# Supplementary material for: Orally Available Small Molecule Regulates TXNIP Expression and Glucagon Action for the Treatment of Diabetes
Source: Research Square preprint supplement (doi:10.21203/rs.3.rs-3766638/v1), 2024-01-09

# Orally Available Small Molecule Regulates TXNIP Expression and Glucagon Action for the Treatment of Diabetes

Zhikuan Luo<sup>1,2,#</sup>, Jun Han<sup>1,#</sup>, Qiong Tian<sup>1,2</sup>, Ruijun Jing<sup>1,2</sup>, Ao Dong<sup>3</sup>, Lingzhi Li<sup>3</sup>, Hongbin Jia<sup>1</sup>, Tinghong Lv<sup>1</sup>, Yunkun Dang<sup>3</sup>, Fan Lai<sup>3,\*</sup>, Shili Chen<sup>4,\*</sup>, Xusheng Ma<sup>2,\*</sup>, Haixue Zheng<sup>2,\*</sup>, Xiaolei Wang<sup>1,2,\*</sup>

<sup>1</sup>State Key Laboratory of Applied Organic Chemistry, Department of Chemistry and School of Pharmacy, Lanzhou University, Lanzhou, P. R. China

<sup>2</sup>State Key Laboratory for Animal Disease Control and Prevention, College of Veterinary Medicine, Lanzhou University, Lanzhou Veterinary Research Institute, Chinese Academy of Agricultural Sciences, Lanzhou, China.

<sup>3</sup>State Key Laboratory for Conservation and Utilization of Bio-Resources in Yunnan, Center for Life Science, Yunnan Key Laboratory of Cell Metabolism and Diseases, School of Life Sciences, Yunnan University, Kunming, China

<sup>4</sup>Shanghai Key Laboratory of Biliary Tract Disease Research, Department of General Surgery, Xinhua Hospital Affiliated to Shanghai Jiao Tong University School of Medicine, Shanghai, China

<sup>5</sup>Gansu Province Research Center for Basic Disciplines of Pathogen Biology, Lanzhou, China.

<sup>#</sup>These authors contributed equally to this work

\*Corresponding authors

Email: [wangxiaolei@lzu.edu.cn](mailto:wangxiaolei@lzu.edu.cn), [haixuezheng@163.com](mailto:haixuezheng@163.com), [maxushengtt@163.com](mailto:maxushengtt@163.com),  
[fanlab2020@163.com](mailto:fanlab2020@163.com), [shilichen@shsmu.edu.cn](mailto:shilichen@shsmu.edu.cn),

*Supporting Information Placeholder*

## Table of Contents

|                                               |     |
|-----------------------------------------------|-----|
| Figure S1 and Table S1.....                   | S2  |
| Figure S2 to Figure S4.....                   | S9  |
| Spectra Data of the Compounds.....            | S13 |
| Chemical Synthesis Section.....               | S21 |
| The HPLC trace for SKL-1201 and SKL-1223..... | S25 |
| The Copy of NMR Data.....                     | S26 |

**Figure S1. Outlook of structural refinement of SKL-1201 to SKL-1223**

**Structure Optimization of SKL-1201**

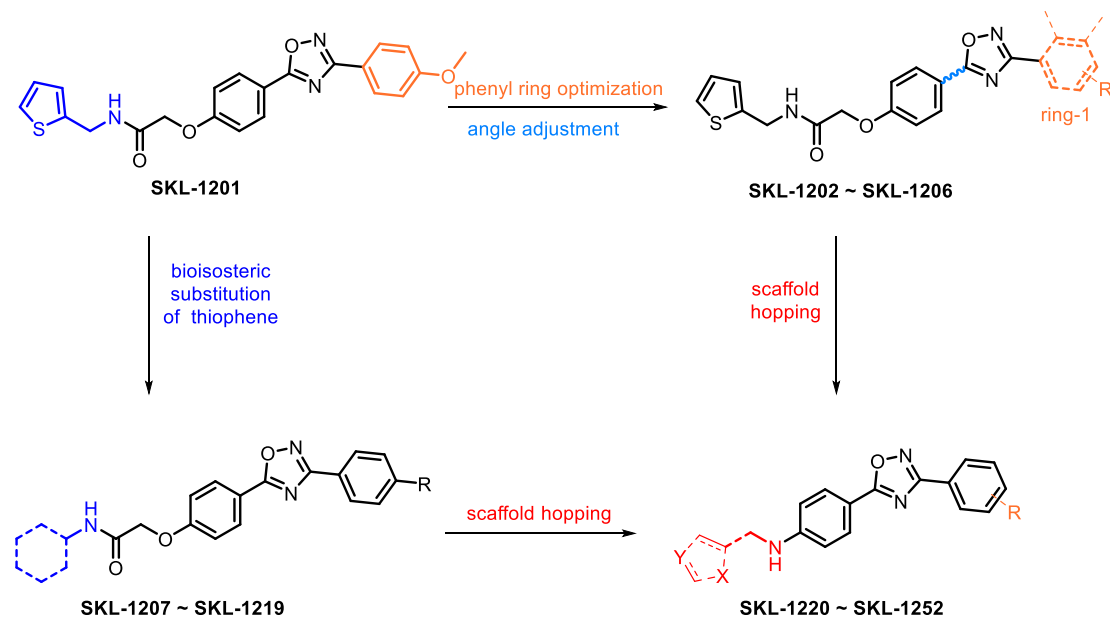

**Table S1. Outlook of inhibition activity of TXNIP.**

| Compounds | Structure | Molecular Weight | Inhibition |
|-----------|-----------|------------------|------------|
| SKL-1201  |           | 421.47           | 25μM 40%   |
| SKL-1202  |           | 391.45           | 25μM 10%   |
| SKL-1203  |           | 391.45           | 25μM 10%   |

|          |                                                                                     |        |      |          |
|----------|-------------------------------------------------------------------------------------|--------|------|----------|
| SKL-1204 | 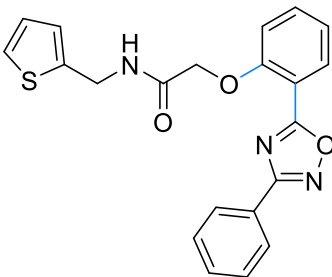   | 391.45 | 25μM | 16%      |
| SKL-1205 |    | 409.44 | 5μM  | Inactive |
| SKL-1206 |    | 441.51 | 5μM  | 30%      |
| SKL-1207 |   | 324.14 | 25μM | Inactive |
| SKL-1208 |  | 401.42 | 25μM | Inactive |
| SKL-1209 |  | 439.39 | 25μM | Inactive |
| SKL-1210 |  | 419.87 | 25μM | 35%      |
| SKL-1211 |  | 440.28 | 25μM | 24%      |

|          |                                                                                     |        |                  |      |
|----------|-------------------------------------------------------------------------------------|--------|------------------|------|
| SKL-1212 | 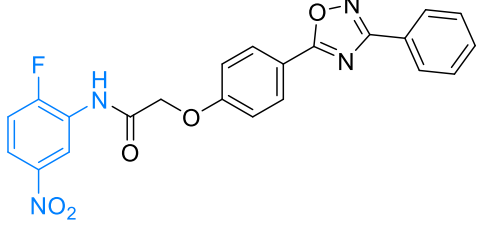   | 434.38 | 25μM             | 36%  |
| SKL-1213 |    | 396.41 | 25μM             | 40%  |
| SKL-1214 |    | 413.48 | 25μM             | 11%  |
| SKL-1215 |   | 421.46 | 25μM             | 20%  |
| SKL-1216 |  | 375.38 | IC <sub>50</sub> | 25μM |
| SKL-1217 |  | 371.40 | 25μM             | 30%  |
| SKL-1218 |  | 438.49 | 25μM             | 15%  |
| SKL-1219 |  | 335.36 | 25μM             | 70%  |



|          |                                                                                     |        |                                                          |
|----------|-------------------------------------------------------------------------------------|--------|----------------------------------------------------------|
| SKL-1220 | 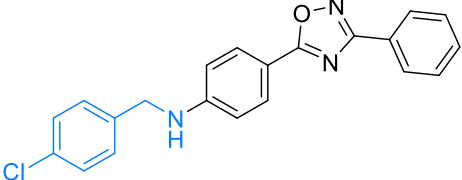   | 361.83 | 25μM 85%<br>5μM 30%                                      |
| SKL-1221 |    | 327.14 | 25μM 99%<br>5μM 62%                                      |
| SKL-1222 |    | 341.41 | 5μM Inactive                                             |
| SKL-1223 |    | 317.35 | 25μM 99%<br>5μM 99%<br>1μM 70%<br>IC <sub>50</sub> 0.4μM |
| SKL-1224 |  | 347.37 | 5μM 30%                                                  |
| SKL-1225 |  | 331.38 | 1μM 15%                                                  |
| SKL-1226 |  | 331.38 | IC <sub>50</sub> 1μM                                     |
| SKL-1227 |  | 331.33 | 1μM Inactive                                             |

|          |                                                                                     |        |     |          |
|----------|-------------------------------------------------------------------------------------|--------|-----|----------|
| SKL-1228 | 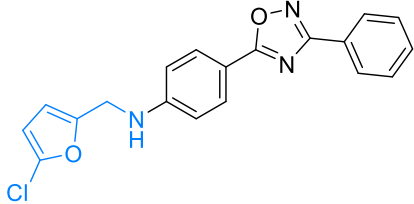   | 351.79 | 1μM | 20%      |
| SKL-1229 |    | 401.35 | 1μM | Inactive |
| SKL-1230 |    | 385.35 | 1μM | Inactive |
| SKL-1231 |   | 335.34 | 1μM | 84%      |
| SKL-1232 |  | 335.34 | 1μM | Inactive |
| SKL-1233 |  | 335.34 | 1μM | Inactive |
| SKL-1234 |  | 331.38 | 1μM | Inactive |
| SKL-1235 |  | 331.38 | 1μM | 17%      |

|          |                                                                                     |        |                             |                                  |
|----------|-------------------------------------------------------------------------------------|--------|-----------------------------|----------------------------------|
| SKL-1236 | 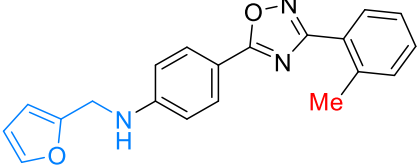   | 331.38 | 1μM                         | 34%                              |
| SKL-1237 |    | 281.32 | 1μM                         | Inactive                         |
| SKL-1238 |    | 318.34 | 1μM                         | 78%                              |
| SKL-1239 |    | 318.34 | 1μM                         | 66%                              |
| SKL-1240 |   | 318.34 | 1μM                         | 32%                              |
| SKL-1241 |  | 318.34 | 1μM                         | 63%                              |
| SKL-1242 |  | 331.38 | 5 μM<br>0.5μM               | 87%<br>45%                       |
| SKL-1243 |  | 333.41 | 25μM<br>5μM<br>1μM<br>0.5μM | 99%<br>80%<br>35%<br>Inactive    |
| SKL-1244 |  | 363.44 | 25μM<br>5μM<br>1μM          | Inactive<br>Inactive<br>Inactive |

|                                                            |                                                                                     |        |                                                              |
|------------------------------------------------------------|-------------------------------------------------------------------------------------|--------|--------------------------------------------------------------|
| SKL-1245                                                   | 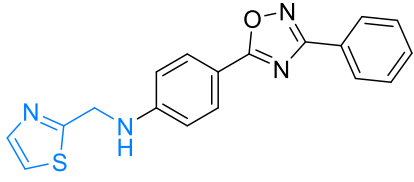   | 334.40 | 5 $\mu$ M 86%<br>(cytotoxic)<br>IC <sub>50</sub> 0.5 $\mu$ M |
| SKL-1246                                                   |    | 357.41 | 25 $\mu$ M 80%<br>5 $\mu$ M 35%                              |
| SKL-1247                                                   |    | 343.39 | 5 $\mu$ M 99%<br>0.5 $\mu$ M 30%                             |
| SKL-1248                                                   |   | 341.41 | 5 $\mu$ M 10%                                                |
| SKL-1249                                                   |  | 345.38 | 5 $\mu$ M 17%                                                |
| SKL-1250                                                   |  | 375.40 | 5 $\mu$ M Inactive                                           |
| SKL-1251                                                   |  | 405.47 | 5 $\mu$ M Inactive                                           |
| SKL-1252                                                   |  | 328.38 | 5 $\mu$ M Inactive                                           |
| The activity was tested via using a dual luciferase assay. |                                                                                     |        |                                                              |

Figure S2. Pharmacokinetic evaluation of SKL-1223

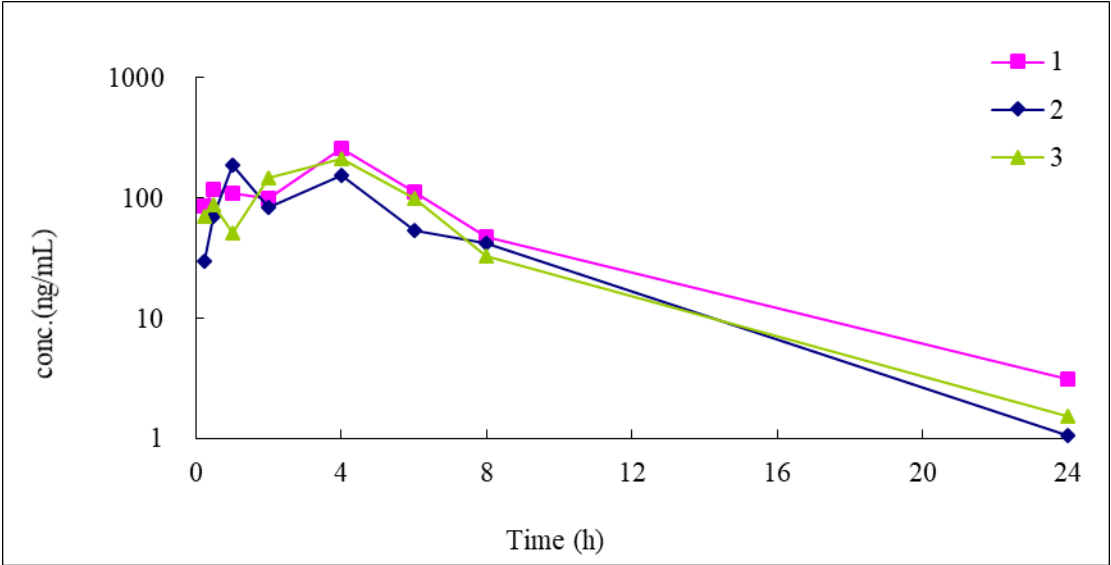

PO dose of 10 mg/kg in Plasma

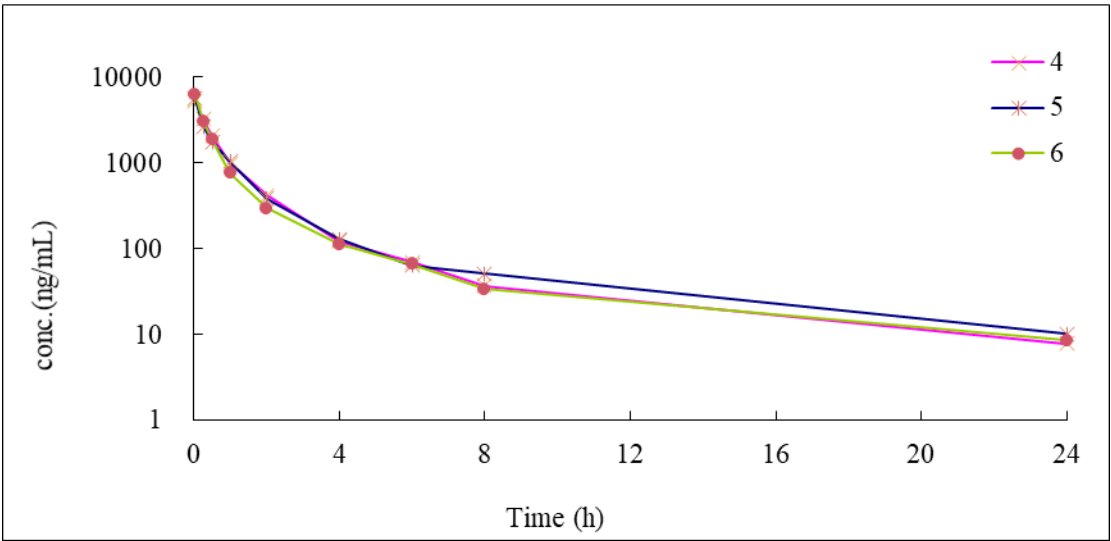

i.v. dose of 4 mg/kg in Plasma

**Table S2. Pharmacokinetic data of SKL-1223**

| Individual and Mean Plasma Concentration-Time Data of SKL-1223 after an PO Dose of 10 mg·kg <sup>-1</sup> in Plasma |               |                  |                          |          |          |                 |        |        |
|---------------------------------------------------------------------------------------------------------------------|---------------|------------------|--------------------------|----------|----------|-----------------|--------|--------|
| Dose<br>(mg·kg <sup>-1</sup> )                                                                                      | Dose<br>route | Sampling<br>time | Concentration<br>(ng/mL) |          |          | Mean<br>(ng/mL) | SD     | CV (%) |
| /                                                                                                                   | /             | (h)              | 1                        | 2        | 3        | /               |        |        |
| 10                                                                                                                  | PO            | 0.25             | 84.6                     | 29.7     | 70.6     | 61.64           | 28.5   | 46.3   |
|                                                                                                                     |               | 0.50             | 118.4                    | 70.5     | 86.7     | 91.82           | 24.4   | 26.5   |
|                                                                                                                     |               | 1.00             | 109.3                    | 188.8    | 50.9     | 116.32          | 69.2   | 59.5   |
|                                                                                                                     |               | 2.00             | 98.9                     | 84.4     | 146.3    | 109.87          | 32.4   | 29.5   |
|                                                                                                                     |               | 4.00             | 257.4                    | 154.5    | 210.6    | 207.51          | 51.5   | 24.8   |
|                                                                                                                     |               | 6.00             | 113.0                    | 54.3     | 98.7     | 88.63           | 30.6   | 34.5   |
|                                                                                                                     |               | 8.00             | 47.0                     | 41.9     | 32.8     | 40.60           | 7.2    | 17.7   |
|                                                                                                                     |               | 24.00            | 3.2                      | 1.1      | 1.5      | 1.92            | 1.1    | 57.0   |
|                                                                                                                     |               | /                | /                        | /        | /        | /               | /      | /      |
| PK Parameters                                                                                                       |               | Unit             | 1                        | 2        | 3        | Mean            | SD     | /      |
| R <sup>2</sup>                                                                                                      |               | NA               | 0.96                     | 1.00     | 0.95     | 0.97            | 0.0    | /      |
| T <sub>1/2</sub>                                                                                                    |               | h                | 3.70                     | 3.12     | 3.21     | 3.34            | 0.3    | /      |
| T <sub>max</sub>                                                                                                    |               | h                | 4.00                     | 1.00     | 4.00     | 3.00            | 1.7    | /      |
| C <sub>max</sub>                                                                                                    |               | ng/mL            | 257.44                   | 188.76   | 210.59   | 218.93          | 35.1   | /      |
| AUC <sub>last</sub>                                                                                                 |               | h*ng/mL          | 1485.09                  | 1105.56  | 1233.97  | 1274.87         | 193.0  | /      |
| AUC <sub>0-inf</sub>                                                                                                |               | h*ng/mL          | 1501.89                  | 1110.37  | 1241.05  | 1284.44         | 199.3  | /      |
| V <sub>z_F_obs</sub>                                                                                                |               | mL/kg            | 35530.57                 | 40492.14 | 37272.41 | 37765.04        | 2517.2 | /      |
| Cl <sub>F_obs</sub>                                                                                                 |               | mL/h/kg          | 6658.26                  | 9006.04  | 8057.69  | 7907.33         | 1181.1 | /      |
| MRT <sub>last</sub>                                                                                                 |               | h                | 5.26                     | 4.99     | 4.88     | 5.05            | 0.2    | /      |
| /                                                                                                                   |               | /                | /                        | /        | /        | /               | /      | /      |
| /                                                                                                                   |               | /                | /                        | /        | /        | /               | /      | /      |
| Individual and Mean Plasma Concentration-Time Data of SKL-1223 after an PO Dose of 10 mg·kg <sup>-1</sup> in Plasma |               |                  |                          |          |          |                 |        |        |

| Individual and Mean Plasma Concentration-Time Data of SKL-1223 after an i.v. Dose of 4 mg·kg <sup>-1</sup> in Plasma |               |                         |                          |         |         |                 |       |        |
|----------------------------------------------------------------------------------------------------------------------|---------------|-------------------------|--------------------------|---------|---------|-----------------|-------|--------|
| Dose<br>(mg·kg <sup>-1</sup> )                                                                                       | Dose<br>route | Sampling<br>time<br>(h) | Concentration<br>(ng/mL) |         |         | Mean<br>(ng/mL) | SD    | CV (%) |
| /                                                                                                                    | /             | (h)                     | 4                        | 5       | 6       | /               |       |        |
| 4.0                                                                                                                  | IV            | 0.03                    | 5336.9                   | 5533.3  | 6141.8  | 5670.68         | 419.7 | 7.4    |
|                                                                                                                      |               | 0.25                    | 3191.9                   | 2662.0  | 3048.5  | 2967.43         | 274.1 | 9.2    |
|                                                                                                                      |               | 0.50                    | 2070.5                   | 1750.3  | 1843.8  | 1888.19         | 164.7 | 8.7    |
|                                                                                                                      |               | 1.00                    | 987.2                    | 1024.4  | 755.9   | 922.50          | 145.5 | 15.8   |
|                                                                                                                      |               | 2.00                    | 415.3                    | 379.9   | 291.5   | 362.24          | 63.8  | 17.6   |
|                                                                                                                      |               | 4.00                    | 121.8                    | 128.7   | 112.5   | 120.97          | 8.2   | 6.7    |
|                                                                                                                      |               | 6.00                    | 69.6                     | 64.1    | 65.8    | 66.48           | 2.8   | 4.3    |
|                                                                                                                      |               | 8.00                    | 36.8                     | 51.2    | 33.5    | 40.50           | 9.4   | 23.2   |
|                                                                                                                      |               | 24.00                   | 7.8                      | 10.1    | 8.5     | 8.78            | 1.2   | 13.5   |
| PK Parameters                                                                                                        |               | Unit                    | 4                        | 5       | 6       | Mean            | SD    | /      |
| R <sup>2</sup>                                                                                                       |               | NA                      | 0.9324                   | 0.9998  | 0.8985  | 0.94            | 0.1   | /      |
| T <sub>1/2</sub>                                                                                                     |               | h                       | 6.17                     | 6.78    | 6.72    | 6.56            | 0.3   | /      |
| T <sub>max</sub>                                                                                                     |               | h                       | 0.033                    | 0.033   | 0.033   | 0.03            | 0.0   | /      |
| C <sub>0</sub>                                                                                                       |               | ng/mL                   | 5770.80                  | 6184.64 | 6832.20 | 6262.55         | 535.0 | /      |
| AUC <sub>last</sub>                                                                                                  |               | h*ng/mL                 | 4423.52                  | 4336.54 | 4013.81 | 4257.96         | 215.9 | /      |
| AUC <sub>0-inf</sub>                                                                                                 |               | h*ng/mL                 | 4492.67                  | 4435.10 | 4096.06 | 4341.27         | 214.3 | /      |
| V <sub>z_obs</sub>                                                                                                   |               | mL/kg                   | 7923.75                  | 8818.19 | 9470.80 | 8737.58         | 776.7 | /      |
| CL <sub>obs</sub>                                                                                                    |               | mL/h/kg                 | 890.34                   | 901.90  | 976.55  | 922.93          | 46.8  | /      |
| MRT <sub>last</sub>                                                                                                  |               | h                       | 1.93                     | 2.27    | 1.92    | 2.04            | 0.2   | /      |
| V <sub>ss_obs</sub>                                                                                                  |               | mL/kg                   | 2141.99                  | 2676.43 | 2501.52 | 2439.98         | 272.5 | /      |
| /                                                                                                                    |               | /                       | /                        | /       | /       | /               | /     | /      |
| Individual and Mean Plasma Concentration-Time Data of SKL-1223 after an i.v. Dose of 4 mg·kg <sup>-1</sup> in Plasma |               |                         |                          |         |         |                 |       |        |

Figure S3. The transcriptome data of SKL-1223 in rat INS-1 cell.

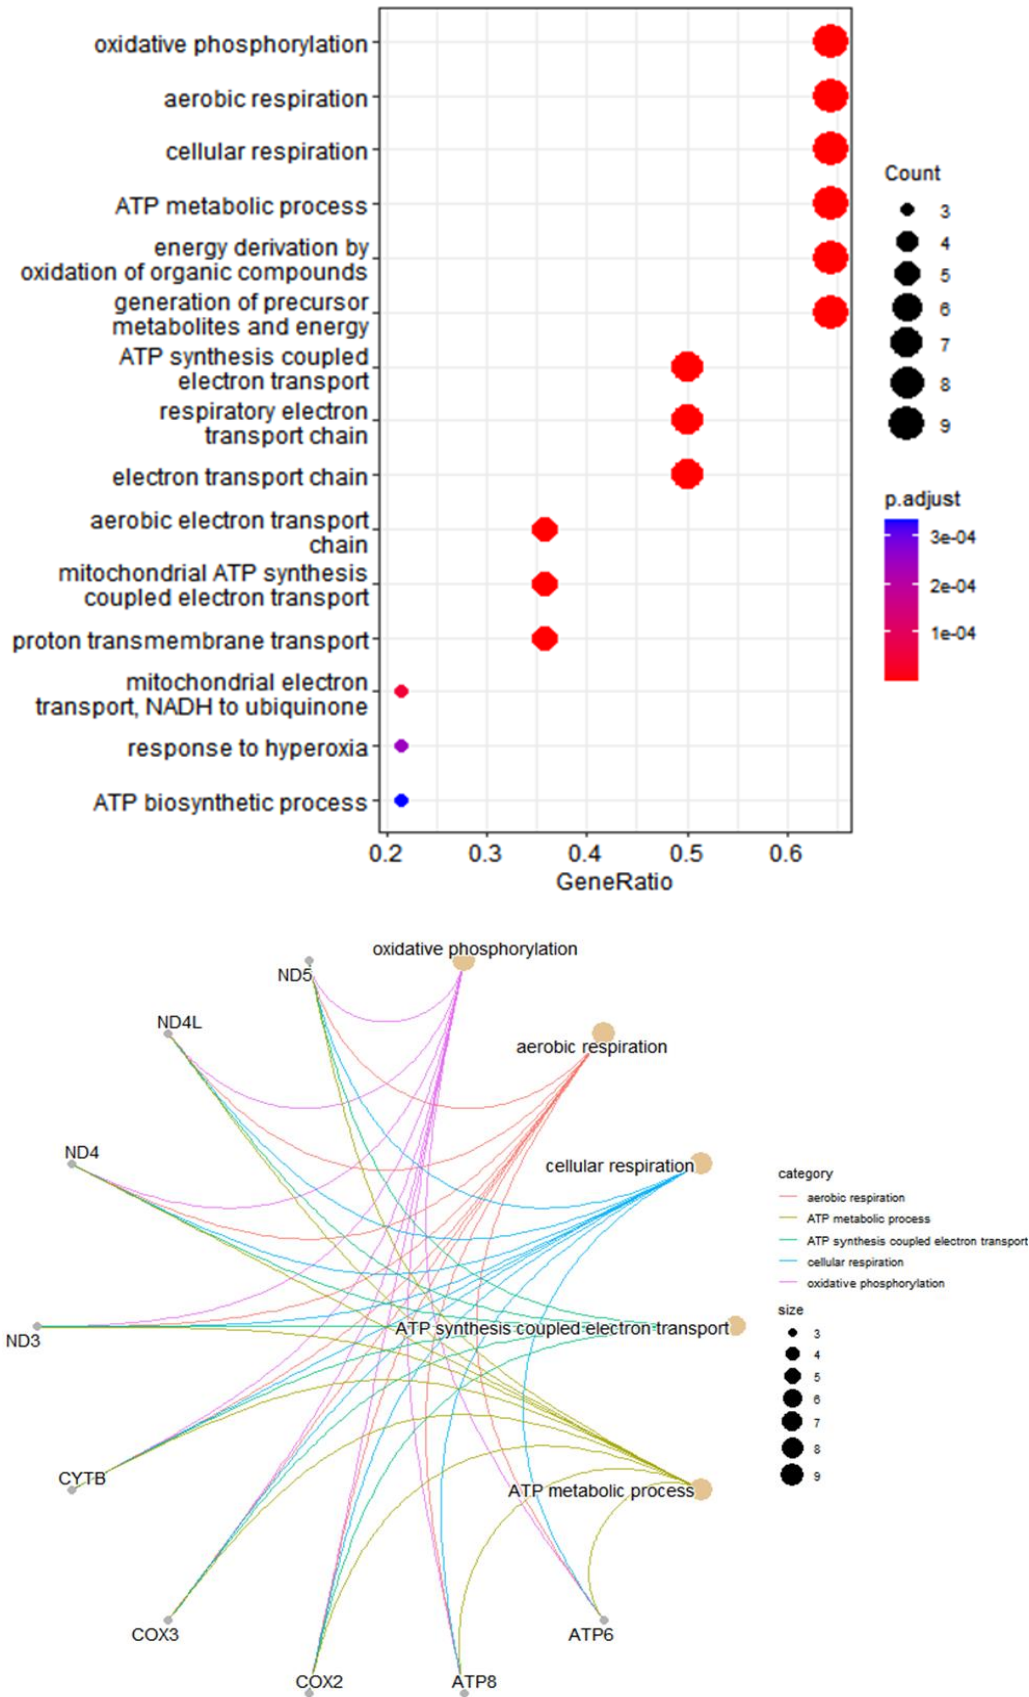

**Figure S4. | SKL-1223 suppresses glucagon-induced glucose production in primary hepatocytes.**

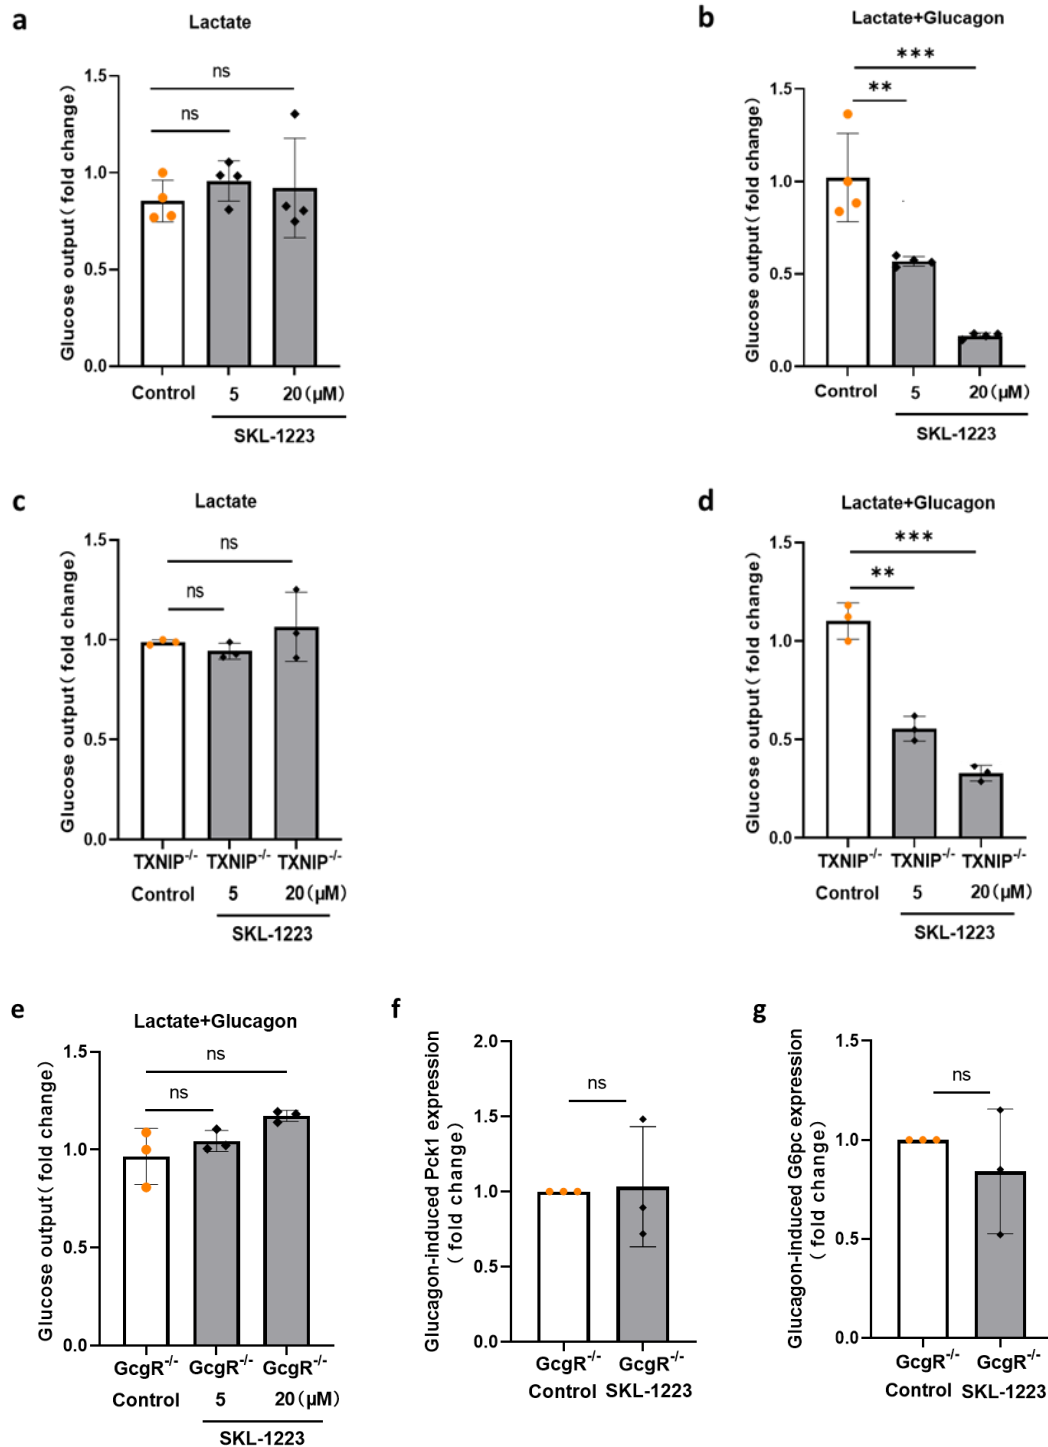

(a) Glucose release was evaluated in lactate in primary mouse hepatocytes treated with or without SKL-1223 at indicated concentrations. (b) Glucose release was evaluated in the presence of lactate (10 nM) and glucagon (100 nM) in primary mouse hepatocytes treated with or without SKL-1223 at indicated concentrations. (c) Glucose release was evaluated in lactate in TXNIP<sup>-/-</sup> primary mouse hepatocytes treated with or without SKL-1223 at indicated concentrations. (d) Glucose release was evaluated in the presence of lactate (10 nM) and glucagon (100 nM) in TXNIP<sup>-/-</sup> primary mouse hepatocytes treated with or without SKL-1223 at indicated concentrations. (e) Glucose release was evaluated in the presence of lactate (10 nM) and glucagon (100 nM) in GcgR<sup>-/-</sup> primary mouse hepatocytes treated with or without SKL-1223 at indicated concentrations.



(f-g) Quantification of Pck1 and G6pc genes expression using qPCR in GegR<sup>-/-</sup> primary mouse hepatocytes in the presence of glucagon treated with SKL-1223. The experiments were independently repeated three times (n = 3), statistics were analyzed using an unpaired Student's t test: \*, P < 0.05; \*\*, P < 0.01; \*\*\*, P < 0.001. Data are mean ± SD.

**Table S3. Data analysis of SKL-1201~SKL-1252**

| Compounds | NMRs                                                                                                                                                                                                                                                                                                                                                                                                                                                                                                                                                                                                                                                                                 | MS spectrum |
|-----------|--------------------------------------------------------------------------------------------------------------------------------------------------------------------------------------------------------------------------------------------------------------------------------------------------------------------------------------------------------------------------------------------------------------------------------------------------------------------------------------------------------------------------------------------------------------------------------------------------------------------------------------------------------------------------------------|-------------|
| SKL-1201  | <p><b><sup>1</sup>H NMR</b> (400 MHz, <i>d</i><sub>6</sub>-DMSO) <math>\delta</math> 8.86 (t, <i>J</i> = 5.6 Hz, 1H), 8.12 (d, <i>J</i> = 8.8 Hz, 2H), 8.01 (d, <i>J</i> = 8.7 Hz, 2H), 7.39 (d, <i>J</i> = 4.4 Hz, 1H), 7.20 (d, <i>J</i> = 8.8 Hz, 2H), 7.13 (d, <i>J</i> = 8.7 Hz, 2H), 6.99 (d, <i>J</i> = 3.4 Hz, 1H), 6.95 (t, <i>J</i> = 8.0 Hz, 1H), 4.69 (s, 2H), 4.52 (d, <i>J</i> = 5.8 Hz, 2H), 3.84 (s, 3H).</p> <p><b><sup>13</sup>C NMR</b> (101 MHz, <i>d</i><sub>6</sub>-DMSO) <math>\delta</math> 174.9, 167.8, 167.0, 161.7, 161.4, 142.0, 129.8, 128.8, 126.6, 125.6, 125.1, 118.6, 116.4, 115.7, 114.6, 66.9, 55.4, 37.0.</p>                                   | [M+H] 422.2 |
| SKL-1202  | <p><b><sup>1</sup>H NMR</b> (400 MHz, <i>d</i><sub>6</sub>-DMSO) <math>\delta</math> 8.86 (t, <i>J</i> = 5.9 Hz, 1H), 8.14 (d, <i>J</i> = 8.9 Hz, 2H), 8.08 (dd, <i>J</i> = 7.5, 2.0 Hz, 2H), 7.64 – 7.56 (m, 3H), 7.39 (dd, <i>J</i> = 5.0, 1.2 Hz, 1H), 7.21 (d, <i>J</i> = 8.9 Hz, 2H), 6.99 (d, <i>J</i> = 2.4 Hz, 1H), 6.95 (dd, <i>J</i> = 5.0, 3.4 Hz, 1H), 4.69 (s, 2H), 4.52 (d, <i>J</i> = 6.0 Hz, 2H).</p> <p><b><sup>13</sup>C NMR</b> (101 MHz, <i>d</i><sub>6</sub>-DMSO) <math>\delta</math> 175.2, 168.2, 167.0, 161.6, 142.1, 131.6, 129.9, 129.3, 127.1, 126.7, 126.3, 125.6, 125.2, 116.3, 115.8, 66.9, 37.0.</p>                                                 | [M+H] 392.1 |
| SKL-1203  | <p><b><sup>1</sup>H NMR</b> (400 MHz, <i>d</i><sub>6</sub>-DMSO) <math>\delta</math> 8.89 (t, <i>J</i> = 5.9 Hz, 1H), 8.09 (dd, <i>J</i> = 7.5, 1.7 Hz, 2H), 7.79 (d, <i>J</i> = 7.7 Hz, 1H), 7.74 (s, 1H), 7.66 – 7.55 (m, 4H), 7.39 – 7.30 (m, 2H), 6.98 (d, <i>J</i> = 2.7 Hz, 1H), 6.92 (dd, <i>J</i> = 5.0, 3.5 Hz, 1H), 4.69 (s, 2H), 4.53 (d, <i>J</i> = 6.0 Hz, 2H).</p> <p><b><sup>13</sup>C NMR</b> (101 MHz, <i>d</i><sub>6</sub>-DMSO) <math>\delta</math> 175.2, 168.3, 167.2, 158.1, 142.1, 131.7, 130.9, 129.3, 127.1, 126.6, 126.1, 125.5, 125.0, 124.4, 120.8, 119.8, 114.0, 67.0, 36.9.</p>                                                                        | [M+H] 392.1 |
| SKL-1204  | <p><b><sup>1</sup>H NMR</b> (400 MHz, <i>d</i><sub>6</sub>-DMSO) <math>\delta</math> 8.78 (t, <i>J</i> = 6.0 Hz, 1H), 8.12 (dd, <i>J</i> = 8.1, 1.5 Hz, 1H), 8.03 (d, <i>J</i> = 7.0 Hz, 2H), 7.68 (t, <i>J</i> = 7.9 Hz, 1H), 7.64 – 7.52 (m, 3H), 7.35 (d, <i>J</i> = 4.7 Hz, 1H), 7.24 (dd, <i>J</i> = 17.1, 8.2 Hz, 2H), 6.90 (dd, <i>J</i> = 5.0, 3.5 Hz, 1H), 6.85 (d, <i>J</i> = 3.0 Hz, 1H), 4.82 (s, 2H), 4.57 (d, <i>J</i> = 6.1 Hz, 2H).</p> <p><b><sup>13</sup>C NMR</b> (101 MHz, <i>d</i><sub>6</sub>-DMSO) <math>\delta</math> 174.2, 167.9, 167.3, 156.1, 141.8, 134.9, 131.6, 130.9, 129.3, 127.1, 126.7, 126.3, 125.3, 125.1, 121.8, 114.3, 112.4, 67.5, 37.0.</p> | [M+H] 392.1 |
| SKL-1205  | <p><b><sup>1</sup>H NMR</b> (400 MHz, <i>d</i><sub>6</sub>-DMSO) <math>\delta</math> 8.86 (t, <i>J</i> = 6.0 Hz, 1H), 8.18 – 8.08 (m, 4H), 7.43 (t, <i>J</i> = 8.9 Hz, 2H), 7.39 (dd, <i>J</i> = 5.0, 1.3 Hz, 1H), 7.21 (d, <i>J</i> = 9.0 Hz, 2H), 6.99 (dd, <i>J</i> = 3.3, 1.1 Hz, 1H), 6.95 (dd, <i>J</i> = 5.0, 3.4 Hz, 1H), 4.69 (s, 2H), 4.52 (d, <i>J</i> = 6.0 Hz, 2H).</p> <p><b><sup>13</sup>C NMR</b> (101 MHz, <i>d</i><sub>6</sub>-DMSO) <math>\delta</math> 175.3, 167.4, 167.0, 164.0 (d, <i>J</i> = 248.8 Hz), 161.6, 142.0, 129.9, 129.6 (d, <i>J</i> = 9.0 Hz), 126.7,</p>                                                                                        | [M+H] 410.1 |

|          |                                                                                                                                                                                                                                                                                                                                                                                                                                                                                                                                                                                                                                    |             |
|----------|------------------------------------------------------------------------------------------------------------------------------------------------------------------------------------------------------------------------------------------------------------------------------------------------------------------------------------------------------------------------------------------------------------------------------------------------------------------------------------------------------------------------------------------------------------------------------------------------------------------------------------|-------------|
|          | 125.6, 125.1, 122.9 (d, $J = 3.2$ Hz), 116.4 (d, $J = 22.2$ Hz), 116.2, 115.8, 66.9, 37.0.                                                                                                                                                                                                                                                                                                                                                                                                                                                                                                                                         |             |
| SKL-1206 | <b><math>^1\text{H}</math> NMR</b> (400 MHz, $d_6$ -DMSO) $\delta$ 8.91 – 8.80 (m, 2H), 8.31 (dd, $J = 7.2, 1.0$ Hz, 1H), 8.20 (d, $J = 8.9$ Hz, 3H), 8.09 (d, $J = 7.7$ Hz, 1H), 7.71 (t, 2H), 7.70 – 7.61 (m, 1H), 7.40 (dd, $J = 5.0, 1.2$ Hz, 1H), 7.24 (d, $J = 8.9$ Hz, 2H), 6.99 (d, $J = 2.4$ Hz, 1H), 6.96 (dd, $J = 5.0, 3.5$ Hz, 1H), 4.71 (s, 2H), 4.53 (d, $J = 6.0$ Hz, 2H).<br><b><math>^{13}\text{C}</math> NMR</b> (101 MHz, $d_6$ -DMSO) $\delta$ 174.4, 168.6, 167.0, 161.6, 142.1, 133.5, 132.0, 130.0, 129.9, 129.4, 128.9, 127.8, 126.7, 126.6, 125.7, 125.6, 125.4, 125.2, 123.2, 116.3, 115.8, 66.9, 37.0. | [M+H] 442.1 |
| SKL-1207 | <b><math>^1\text{H}</math> NMR</b> (400 MHz, $d_6$ -DMSO) $\delta$ 10.19 (s, 1H), 8.16 (d, $J = 8.9$ Hz, 2H), 8.08 (dd, $J = 7.5, 2.0$ Hz, 2H), 7.67 – 7.54 (m, 5H), 7.33 (t, $J = 7.9$ Hz, 2H), 7.26 (d, $J = 8.9$ Hz, 2H), 7.09 (t, $J = 7.4$ Hz, 1H), 4.87 (s, 2H).<br><b><math>^{13}\text{C}</math> NMR</b> (101 MHz, $d_6$ -DMSO) $\delta$ 175.3, 168.2, 165.2, 161.8, 138.4, 131.6, 130.0, 129.3, 128.8, 127.1, 126.3, 123.8, 119.7, 116.3, 115.7, 67.1, 40.2, 39.9, 39.7, 39.5, 39.3, 39.1, 38.9.                                                                                                                           | [M+H] 372.2 |
| SKL-1208 | <b><math>^1\text{H}</math> NMR</b> (400 MHz, $d_6$ -DMSO) $\delta$ 10.04 (s, 1H), 8.16 (d, $J = 8.9$ Hz, 2H), 8.09 (dd, $J = 7.5, 2.0$ Hz, 2H), 7.65 – 7.55 (m, 3H), 7.55 (d, $J = 9.1$ Hz, 2H), 7.26 (d, $J = 8.9$ Hz, 2H), 6.91 (d, $J = 9.1$ Hz, 2H), 4.83 (s, 2H), 3.73 (s, 3H).<br><b><math>^{13}\text{C}</math> NMR</b> (101 MHz, $d_6$ -DMSO) $\delta$ 175.2, 168.1, 165.4, 161.7, 155.6, 131.6, 131.4, 129.9, 129.2, 127.1, 126.3, 121.4, 116.3, 115.7, 113.9, 67.1, 55.2.                                                                                                                                                 | [M+H] 402.1 |
| SKL-1209 | <b><math>^1\text{H}</math> NMR</b> (400 MHz, $d_6$ -DMSO) $\delta$ 10.64 (s, 1H), 8.16 (d, $J = 8.9$ Hz, 2H), 8.12 – 8.05 (m, 2H), 7.87 (d, $J = 8.5$ Hz, 2H), 7.70 (d, $J = 8.6$ Hz, 2H), 7.65 – 7.55 (m, 3H), 7.26 (d, $J = 9.0$ Hz, 2H), 4.93 (s, 2H).<br><b><math>^{13}\text{C}</math> NMR</b> (101 MHz, $d_6$ -DMSO) $\delta$ 175.2, 168.2, 166.6, 161.7, 142.0, 131.6, 130.0, 129.3, 127.1, 126.3, 126.1 (d, $J = 4.0$ Hz), 123.7 (d, $J = 32.0$ Hz), 119.6, 116.4, 115.7, 115.5, 67.0.                                                                                                                                      | [M+H] 440.2 |
| SKL-1210 | <b><math>^1\text{H}</math> NMR</b> (400 MHz, $d_6$ -DMSO) $\delta$ 9.68 (s, 1H), 8.18 (d, $J = 8.8$ Hz, 2H), 8.10 (dd, $J = 7.4, 1.9$ Hz, 2H), 7.65 – 7.57 (m, 3H), 7.46 (d, $J = 8.5$ Hz, 1H), 7.34 (d, $J = 2.0$ Hz, 1H), 7.31 – 7.23 (m, 3H), 4.92 (s, 2H), 2.21 (s, 3H).<br><b><math>^{13}\text{C}</math> NMR</b> (101 MHz, $d_6$ -DMSO) $\delta$ 175.2, 168.2, 166.2, 161.6, 134.6, 134.5, 131.6, 130.0, 129.9, 129.5, 129.2, 127.1, 126.8, 126.3, 125.9, 116.4, 115.8, 67.0, 17.5.                                                                                                                                           | [M+H] 420.2 |
| SKL-1211 | <b><math>^1\text{H}</math> NMR</b> (400 MHz, $d_6$ -DMSO) $\delta$ 10.23 (s, 1H), 8.19 (d, $J = 8.7$ Hz, 2H), 8.09 (dd, $J = 7.5, 1.9$ Hz, 2H), 7.65 – 7.52 (m, 5H), 7.38 (t, $J = 8.1$ Hz, 1H), 7.29 (d, $J = 8.8$ Hz, 2H), 4.94 (s, 2H).<br><b><math>^{13}\text{C}</math> NMR</b> (101 MHz, $d_6$ -DMSO) $\delta$ 175.2, 168.2, 166.4, 161.5, 133.9, 132.2, 131.6, 129.9, 129.6, 129.3, 128.6, 127.1, 126.3, 116.5, 115.9, 66.7, 40.2, 39.9, 39.7, 39.5, 39.3, 39.1, 38.9.                                                                                                                                                       | [M+H] 441.0 |

|          |                                                                                                                                                                                                                                                                                                                                                                                                                                                                                                                                                                                                                                                                                          |             |
|----------|------------------------------------------------------------------------------------------------------------------------------------------------------------------------------------------------------------------------------------------------------------------------------------------------------------------------------------------------------------------------------------------------------------------------------------------------------------------------------------------------------------------------------------------------------------------------------------------------------------------------------------------------------------------------------------------|-------------|
| SKL-1212 | <p><b><sup>1</sup>H NMR</b> (400 MHz, <i>d</i><sub>6</sub>-DMSO) <math>\delta</math> 10.49 (s, 1H), 8.92 (dd, <i>J</i> = 6.4, 2.6 Hz, 1H), 8.16 (d, <i>J</i> = 8.7 Hz, 2H), 8.13 – 8.04 (m, 3H), 7.60 (d, <i>J</i> = 7.3 Hz, 4H), 7.25 (d, <i>J</i> = 8.7 Hz, 2H), 5.03 (s, 2H).</p> <p><b><sup>13</sup>C NMR</b> (151 MHz, <i>d</i><sub>6</sub>-DMSO) <math>\delta</math> 175.2, 168.1, 167.1, 161.6, 156.8 (d, <i>J</i> = 256.3 Hz), 143.7, 131.6, 130.0, 129.2, 127.1, 126.7 (d, <i>J</i> = 13.3 Hz), 126.3, 121.0 (d, <i>J</i> = 9.5 Hz), 118.6, 116.8 (d, <i>J</i> = 22.4 Hz), 116.4, 115.6, 66.7.</p>                                                                              | [M+H] 435.2 |
| SKL-1213 | <p><b><sup>1</sup>H NMR</b> (600 MHz, <i>d</i><sub>6</sub>-DMSO) <math>\delta</math> 10.52 (s, 1H), 8.16 (d, <i>J</i> = 8.9 Hz, 2H), 8.12 (s, 1H), 8.08 (dd, <i>J</i> = 7.9, 1.6 Hz, 2H), 7.92 – 7.87 (m, 1H), 7.64 – 7.51 (m, 5H), 7.27 (d, <i>J</i> = 8.9 Hz, 2H), 4.91 (s, 2H).</p> <p><b><sup>13</sup>C NMR</b> (151 MHz, <i>d</i><sub>6</sub>-DMSO) <math>\delta</math> 175.2, 168.2, 166.7, 161.6, 139.1, 131.6, 130.3, 130.0, 129.3, 127.4, 127.1, 126.3, 124.3, 122.4, 118.6, 116.4, 115.8, 111.6, 67.0.</p>                                                                                                                                                                     | [M+H] 397.2 |
| SKL-1214 | <p><b><sup>1</sup>H NMR</b> (400 MHz, <i>d</i><sub>6</sub>-DMSO) <math>\delta</math> 9.51 (s, 1H), 8.18 (d, <i>J</i> = 8.9 Hz, 2H), 8.09 (dd, <i>J</i> = 7.5, 2.0 Hz, 2H), 7.67 – 7.55 (m, 3H), 7.29 (d, <i>J</i> = 8.9 Hz, 2H), 6.88 (s, 2H), 4.88 (s, 2H), 2.22 (s, 3H), 2.09 (s, 6H).</p> <p><b><sup>13</sup>C NMR</b> (101 MHz, <i>d</i><sub>6</sub>-DMSO) <math>\delta</math> 175.2, 168.2, 165.9, 161.7, 135.7, 135.0, 131.6, 131.6, 129.9, 129.3, 128.3, 127.1, 126.3, 116.3, 115.8, 67.0, 20.5, 18.0.</p>                                                                                                                                                                        | [M+H] 414.2 |
| SKL-1215 | <p><b><sup>1</sup>H NMR</b> (400 MHz, <i>d</i><sub>6</sub>-DMSO) <math>\delta</math> 10.40 (s, 1H), 8.33 (s, 1H), 8.18 (d, <i>J</i> = 8.8 Hz, 2H), 8.09 (dd, <i>J</i> = 7.4, 1.9 Hz, 2H), 7.90 (d, <i>J</i> = 8.9 Hz, 1H), 7.84 (t, <i>J</i> = 8.4 Hz, 2H), 7.67 (dd, <i>J</i> = 8.8, 1.9 Hz, 1H), 7.66 – 7.53 (m, 3H), 7.48 (t, <i>J</i> = 7.0 Hz, 1H), 7.42 (t, <i>J</i> = 6.9 Hz, 1H), 7.30 (d, <i>J</i> = 8.9 Hz, 2H), 4.95 (s, 2H).</p> <p><b><sup>13</sup>C NMR</b> (101 MHz, <i>d</i><sub>6</sub>-DMSO) <math>\delta</math> 175.2, 168.2, 166.2, 161.8, 135.9, 133.3, 131.6, 130.0, 129.3, 128.4, 127.5, 127.4, 127.1, 126.5, 126.3, 124.8, 120.2, 116.3, 115.9, 115.8, 67.1.</p> | [M+H] 422.3 |
| SKL-1216 | <p><b><sup>1</sup>H NMR</b> (400 MHz, <i>d</i><sub>6</sub>-DMSO) <math>\delta</math> 8.71 (t, <i>J</i> = 5.7 Hz, 1H), 8.14 (d, <i>J</i> = 8.9 Hz, 2H), 8.08 (dd, <i>J</i> = 7.5, 2.0 Hz, 2H), 7.66 – 7.55 (m, 4H), 7.21 (d, <i>J</i> = 8.9 Hz, 2H), 6.39 (dd, <i>J</i> = 3.0, 1.9 Hz, 1H), 6.25 (d, <i>J</i> = 2.5 Hz, 1H), 4.69 (s, 2H), 4.35 (d, <i>J</i> = 5.8 Hz, 2H).</p> <p><b><sup>13</sup>C NMR</b> (101 MHz, <i>d</i><sub>6</sub>-DMSO) <math>\delta</math> 175.2, 168.1, 167.0, 161.6, 152.0, 142.1, 131.6, 129.9, 129.2, 127.1, 126.3, 116.3, 115.7, 110.5, 107.0, 66.9, 35.3.</p>                                                                                            | [M+H] 376.2 |
| SKL-1217 | <p><b><sup>1</sup>H NMR</b> (400 MHz, <i>d</i><sub>6</sub>-DMSO) <math>\delta</math> 8.76 (t, <i>J</i> = 5.9 Hz, 1H), 8.15 (d, <i>J</i> = 8.8 Hz, 2H), 8.09 (dd, <i>J</i> = 7.4, 1.9 Hz, 2H), 7.64 – 7.57 (m, 3H), 7.34 – 7.21 (m, 7H), 4.72 (s, 2H), 4.37 (d, <i>J</i> = 6.1 Hz, 2H).</p> <p><b><sup>13</sup>C NMR</b> (101 MHz, <i>d</i><sub>6</sub>-DMSO) <math>\delta</math> 175.2, 168.2, 167.2, 161.6, 139.2, 131.6, 129.9, 129.3, 128.3, 127.3, 127.1, 126.8, 126.3, 116.3, 115.8, 67.0, 41.9.</p>                                                                                                                                                                                | [M+H] 386.2 |
| SKL-1218 | <p><b><sup>1</sup>H NMR</b> (400 MHz, <i>d</i><sub>6</sub>-DMSO) <math>\delta</math> 10.83 (s, 1H), 8.30 (t, <i>J</i> = 5.8 Hz, 1H), 8.14 (d, <i>J</i> = 8.6 Hz, 2H), 8.09 (dd, <i>J</i> = 8.0, 4 Hz, 2H), 7.65 – 7.52 (m, 4H), 7.34 (d, <i>J</i> = 8.0 Hz, 1H), 7.18 (d, <i>J</i> = 8.8 Hz, 2H), 7.16 (s, 1H), 7.07 (t, <i>J</i> = 7.4 Hz, 1H), 6.98 (t, <i>J</i> = 7.3 Hz, 1H), 4.63</p>                                                                                                                                                                                                                                                                                               | [M+H] 439.2 |

|          |                                                                                                                                                                                                                                                                                                                                                                                                                                                                                                                  |             |
|----------|------------------------------------------------------------------------------------------------------------------------------------------------------------------------------------------------------------------------------------------------------------------------------------------------------------------------------------------------------------------------------------------------------------------------------------------------------------------------------------------------------------------|-------------|
|          | (s, 2H), 3.44 (q, $J = 6.9$ Hz, 2H), 2.88 (t, $J = 7.2$ Hz, 2H).<br><b><math>^{13}\text{C}</math> NMR</b> (101 MHz, $d_6$ -DMSO) $\delta$ 175.2, 168.1, 166.9, 161.6, 136.2, 131.6, 129.9, 129.2, 127.2, 127.1, 126.3, 122.7, 120.9, 118.2, 116.3, 115.7, 111.6, 111.4, 67.0, 25.1.                                                                                                                                                                                                                              |             |
| SKL-1219 | <b><math>^1\text{H}</math> NMR</b> (400 MHz, $d_6$ -DMSO) $\delta$ 8.24 (d, $J = 3.8$ Hz, 1H), 8.14 (d, $J = 8.9$ Hz, 2H), 8.09 (dd, $J = 7.5, 2.0$ Hz, 2H), 7.64 – 7.57 (m, 3H), 7.19 (d, $J = 8.9$ Hz, 2H), 4.59 (s, 2H), 2.70 (tt, $J = 7.8, 4.0$ Hz, 1H), 0.68 – 0.61 (m, 2H), 0.52 – 0.44 (m, 2H).<br><b><math>^{13}\text{C}</math> NMR</b> (101 MHz, $d_6$ -DMSO) $\delta$ 175.3, 168.2, 168.1, 161.7, 131.6, 129.9, 129.3, 127.1, 126.3, 116.2, 115.7, 66.9, 22.2, 5.6.                                   | [M+H] 336.2 |
| SKL-1220 | <b><math>^1\text{H}</math> NMR</b> (600 MHz, $\text{CDCl}_3$ ) $\delta$ 8.18 – 8.13 (m, 2H), 8.02 (d, $J = 8.8$ Hz, 2H), 7.52 – 7.47 (m, 3H), 7.34 (d, $J = 8.5$ Hz, 2H), 7.30 (d, $J = 8.5$ Hz, 2H), 6.68 (d, $J = 8.8$ Hz, 2H), 4.60 (t, $J = 5.4$ Hz, 1H), 4.41 (d, $J = 5.6$ Hz, 2H).<br><b><math>^{13}\text{C}</math> NMR</b> (101 MHz, $d_6$ -DMSO) $\delta$ 175.9, 167.8, 152.5, 138.3, 131.4, 131.4, 129.6, 129.2, 129.0, 128.4, 127.0, 126.7, 112.2, 110.0, 45.0.                                       | [M+H] 362.2 |
| SKL-1221 | <b><math>^1\text{H}</math> NMR</b> (400 MHz, $\text{CDCl}_3$ ) $\delta$ 8.16 (dd, $J = 6.6, 3.2$ Hz, 2H), 8.02 (d, $J = 8.8$ Hz, 2H), 7.55 – 7.45 (m, 3H), 7.43 – 7.28 (m, 5H), 6.71 (d, $J = 8.8$ Hz, 2H), 4.60 (t, $J = 5.4$ Hz, 1H), 4.43 (d, $J = 5.4$ Hz, 2H).<br><b><math>^{13}\text{C}</math> NMR</b> (101 MHz, $\text{CDCl}_3$ ) $\delta$ 176.2, 168.8, 151.6, 138.3, 131.0, 130.2, 129.0, 128.9, 127.8, 127.6 (two carbons), 113.1, 112.5, 77.4, 47.8.                                                  | [M+H] 328.2 |
| SKL-1222 | <b><math>^1\text{H}</math> NMR</b> (400 MHz, $\text{CDCl}_3$ ) $\delta$ 8.16 (dd, $J = 6.6, 3.2$ Hz, 2H), 8.02 (d, $J = 8.8$ Hz, 2H), 7.54 – 7.44 (m, 3H), 7.26 (d, $J = 15.0$ Hz, 1H), 7.21 – 7.09 (m, 3H), 6.71 (d, $J = 8.8$ Hz, 2H), 4.56 (t, $J = 5.3$ Hz, 1H), 4.38 (d, $J = 5.5$ Hz, 2H), 2.36 (s, 3H).<br><b><math>^{13}\text{C}</math> NMR</b> (101 MHz, $\text{CDCl}_3$ ) $\delta$ 176.3, 168.7, 151.7, 137.5, 135.2, 131.0, 130.1, 129.6, 128.9, 127.6 (two carbons), 113.0, 112.5, 77.4, 47.6, 21.2. | [M+H] 342.2 |
| SKL-1223 | <b><math>^1\text{H}</math> NMR</b> (600 MHz, $d_6$ -DMSO) $\delta$ 8.06 (dd, $J = 7.8, 1.7$ Hz, 2H), 7.89 (d, $J = 8.8$ Hz, 2H), 7.62 – 7.54 (m, 4H), 7.20 (t, $J = 5.9$ Hz, 1H), 6.83 (d, $J = 8.9$ Hz, 2H), 6.41 (dd, $J = 3.1, 1.8$ Hz, 1H), 6.36 (d, $J = 3.1$ Hz, 1H), 4.38 (d, $J = 5.9$ Hz, 2H).<br><b><math>^{13}\text{C}</math> NMR</b> (151 MHz, $d_6$ -DMSO) $\delta$ 176.0, 167.9, 152.4, 152.2, 142.3, 131.4, 129.5, 129.2, 127.0, 126.7, 112.2, 110.5, 110.1, 107.4, 39.2.                         | [M+H] 318.2 |
| SKL-1224 | <b><math>^1\text{H}</math> NMR</b> (400 MHz, $d_6$ -DMSO) $\delta$ 7.99 (d, $J = 8.9$ Hz, 2H), 7.88 (d, $J = 8.8$ Hz, 2H), 7.60 (dd, $J = 1.7, 0.7$ Hz, 1H), 7.20 (t, $J = 5.9$ Hz, 1H), 7.11 (d, $J = 8.9$ Hz, 2H), 6.82 (d, $J = 8.9$ Hz, 2H), 6.41 (dd, $J = 3.1, 1.9$ Hz, 1H), 6.36 (d, $J = 2.9$ Hz, 1H), 4.37 (d, $J = 5.9$ Hz, 2H), 3.84 (s, 3H).<br><b><math>^{13}\text{C}</math> NMR</b> (101 MHz, $d_6$ -DMSO) $\delta$ 175.6, 167.5, 161.6, 152.4,                                                    | [M+H] 348.2 |

|          |                                                                                                                                                                                                                                                                                                                                                                                                                                                                                                                                                                                                                    |                          |
|----------|--------------------------------------------------------------------------------------------------------------------------------------------------------------------------------------------------------------------------------------------------------------------------------------------------------------------------------------------------------------------------------------------------------------------------------------------------------------------------------------------------------------------------------------------------------------------------------------------------------------------|--------------------------|
|          | 152.3, 142.3, 129.5, 128.7, 119.0, 114.6, 112.2, 110.5, 110.2, 107.4, 55.4, 39.2.                                                                                                                                                                                                                                                                                                                                                                                                                                                                                                                                  |                          |
| SKL-1225 | <b><sup>1</sup>H NMR</b> (400 MHz, <i>d</i> <sub>6</sub> -DMSO) $\delta$ 8.06 (dd, <i>J</i> = 7.4, 2.2 Hz, 2H), 7.89 (d, <i>J</i> = 8.8 Hz, 2H), 7.62 – 7.54 (m, 3H), 7.17 (t, <i>J</i> = 5.8 Hz, 1H), 6.83 (d, <i>J</i> = 8.8 Hz, 2H), 6.22 (d, <i>J</i> = 2.9 Hz, 1H), 6.00 (d, <i>J</i> = 2.8 Hz, 1H), 4.30 (d, <i>J</i> = 5.8 Hz, 2H), 2.23 (s, 3H).<br><b><sup>13</sup>C NMR</b> (101 MHz, <i>d</i> <sub>6</sub> -DMSO) $\delta$ 175.9, 167.8, 152.4, 150.8, 150.3, 131.3, 129.5, 129.2, 127.0, 126.7, 112.1, 110.0, 108.2, 106.4, 39.2, 13.3.                                                                | [M+H] <sup>+</sup> 332.2 |
| SKL-1226 | <b><sup>1</sup>H NMR</b> (600 MHz, <i>d</i> <sub>6</sub> -DMSO) $\delta$ 8.06 (dd, <i>J</i> = 7.5, 1.5 Hz, 2H), 7.96 (d, <i>J</i> = 9.0 Hz, 2H), 7.62 – 7.54 (m, 4H), 7.00 (d, <i>J</i> = 9.0 Hz, 2H), 6.39 (dd, <i>J</i> = 3.0, 1.8 Hz, 1H), 6.35 (d, <i>J</i> = 3.0 Hz, 1H), 4.67 (s, 2H), 3.09 (s, 3H).<br><b><sup>13</sup>C NMR</b> (151 MHz, <i>d</i> <sub>6</sub> -DMSO) $\delta$ 175.8, 167.9, 152.1, 151.2, 142.6, 131.3, 129.3, 129.1, 127.0, 126.6, 112.2, 110.3, 110.2, 107.9, 47.9, 38.1.                                                                                                              | [M+H] <sup>+</sup> 332.2 |
| SKL-1227 | <b><sup>1</sup>H NMR</b> (600 MHz, <i>d</i> <sub>6</sub> -DMSO) $\delta$ 10.60 (s, 1H), 8.18 (d, <i>J</i> = 8.8 Hz, 2H), 8.09 (dd, <i>J</i> = 7.8, 1.7 Hz, 2H), 8.07 (d, <i>J</i> = 8.8 Hz, 2H), 7.99 (dd, <i>J</i> = 1.6, 0.7 Hz, 1H), 7.65 – 7.57 (m, 3H), 7.43 (dd, <i>J</i> = 3.5, 0.8 Hz, 2H), 6.74 (dd, <i>J</i> = 3.5, 1.7 Hz, 1H).<br><b><sup>13</sup>C NMR</b> (101 MHz, <i>d</i> <sub>6</sub> -DMSO) $\delta$ 175.2, 168.2, 156.5, 147.0, 146.3, 143.2, 131.6, 129.3, 128.9, 127.1, 126.3, 120.3, 118.1, 115.6, 112.4.                                                                                   | [M+H] <sup>+</sup> 332.2 |
| SKL-1228 | <b><sup>1</sup>H NMR</b> (400 MHz, <i>d</i> <sub>6</sub> -DMSO) $\delta$ 8.06 (dd, <i>J</i> = 7.5, 2.2 Hz, 2H), 7.90 (d, <i>J</i> = 8.9 Hz, 2H), 7.63 – 7.53 (m, 3H), 7.24 (br, 1H), 6.84 (d, <i>J</i> = 8.9 Hz, 2H), 6.48 (d, <i>J</i> = 3.3 Hz, 1H), 6.41 (d, <i>J</i> = 3.3 Hz, 1H), 4.36 (s, 2H).<br><b><sup>13</sup>C NMR</b> (151 MHz, <i>d</i> <sub>6</sub> -DMSO) $\delta$ 175.9, 167.8, 152.4, 152.1, 133.7, 131.3, 129.5, 129.1, 127.0, 126.6, 112.2, 110.4, 110.1, 107.4, 39.1.                                                                                                                         | [M+H] <sup>+</sup> 352.1 |
| SKL-1229 | <b><sup>1</sup>H NMR</b> (400 MHz, <i>d</i> <sub>6</sub> -DMSO) $\delta$ 8.17 (d, <i>J</i> = 8.8 Hz, 2H), 7.89 (d, <i>J</i> = 8.8 Hz, 2H), 7.60 (dd, <i>J</i> = 1.9, 0.8 Hz, 1H), 7.57 (d, <i>J</i> = 8.0 Hz, 2H), 7.24 (t, <i>J</i> = 5.9 Hz, 1H), 6.83 (d, <i>J</i> = 8.9 Hz, 2H), 6.41 (dd, <i>J</i> = 3.1, 1.9 Hz, 1H), 6.36 (d, <i>J</i> = 3.3 Hz, 1H), 4.38 (d, <i>J</i> = 5.8 Hz, 2H).<br><b><sup>13</sup>C NMR</b> (101 MHz, <i>d</i> <sub>6</sub> -DMSO) $\delta$ 176.2, 166.9, 152.5, 152.2, 150.3, 142.3, 129.6, 129.2, 125.9, 121.6, 120.0 (d, <i>J</i> = 257.1 Hz), 112.2, 110.5, 109.9, 107.4, 39.2. | [M+H] <sup>+</sup> 402.2 |
| SKL-1230 | <b><sup>1</sup>H NMR</b> (400 MHz, <i>d</i> <sub>6</sub> -DMSO) $\delta$ 8.25 (d, <i>J</i> = 8.1 Hz, 2H), 7.93 (d, <i>J</i> = 8.3 Hz, 2H), 7.90 (d, <i>J</i> = 8.8 Hz, 2H), 7.60 (dd, <i>J</i> = 1.7, 0.8 Hz, 1H), 7.25 (t, <i>J</i> = 5.9 Hz, 1H), 6.83 (d, <i>J</i> = 8.9 Hz, 2H), 6.41 (dd, <i>J</i> = 3.1, 1.9 Hz, 1H), 6.36 (d, <i>J</i> = 3.1 Hz, 1H), 4.38 (d, <i>J</i> = 5.8 Hz, 2H).<br><b><sup>13</sup>C NMR</b> (101 MHz, <i>d</i> <sub>6</sub> -DMSO) $\delta$ 176.4, 166.9, 152.4 (d, <i>J</i> = 39.0                                                                                                 | [M+H] <sup>+</sup> 386.2 |

|          |                                                                                                                                                                                                                                                                                                                                                                                                                                                                                                                                                                                                                                                                                                                                                                                                                                                                                                                                                  |             |
|----------|--------------------------------------------------------------------------------------------------------------------------------------------------------------------------------------------------------------------------------------------------------------------------------------------------------------------------------------------------------------------------------------------------------------------------------------------------------------------------------------------------------------------------------------------------------------------------------------------------------------------------------------------------------------------------------------------------------------------------------------------------------------------------------------------------------------------------------------------------------------------------------------------------------------------------------------------------|-------------|
|          | Hz), 142.3, 131.2 (d, $J = 32.0$ Hz), 130.6, 129.6, 127.8, 126.1 (q, $J = 3.7$ Hz), 125.2, 122.5, 112.2, 110.4, 109.8, 107.4, 39.2.                                                                                                                                                                                                                                                                                                                                                                                                                                                                                                                                                                                                                                                                                                                                                                                                              |             |
| SKL-1231 | <p><b><math>^1\text{H}</math> NMR</b> (400 MHz, <math>d_6</math>-DMSO) <math>\delta</math> 8.08 (td, <math>J = 7.7, 1.7</math> Hz, 1H), 7.89 (d, <math>J = 8.8</math> Hz, 2H), 7.69 – 7.62 (m, 1H), 7.60 (dd, <math>J = 1.8, 0.8</math> Hz, 1H), 7.49 – 7.38 (m, 2H), 7.23 (t, <math>J = 5.9</math> Hz, 1H), 6.84 (d, <math>J = 8.9</math> Hz, 2H), 6.41 (dd, <math>J = 3.2, 1.8</math> Hz, 1H), 6.36 (dd, 1H), 4.38 (d, <math>J = 5.9</math> Hz, 2H).</p> <p><b><math>^{13}\text{C}</math> NMR</b> (151 MHz, <math>d_6</math>-DMSO) <math>\delta</math> 175.9, 167.8, 152.4, 152.1, 133.7, 131.3, 129.5, 129.1, 127.0, 126.5, 112.2, 110.4, 110.1, 107.4, 39.1.</p>                                                                                                                                                                                                                                                                             | [M+H] 336.2 |
| SKL-1232 | <p><b><math>^1\text{H}</math> NMR</b> (400 MHz, <math>d_6</math>-DMSO) <math>\delta</math> 7.92 – 7.87 (m, 3H), 7.78 (ddd, <math>J = 9.6, 2.5, 1.4</math> Hz, 1H), 7.67 – 7.61 (m, 1H), 7.60 (dd, <math>J = 1.8, 0.8</math> Hz, 1H), 7.45 (tdd, <math>J = 8.4, 2.7, 0.9</math> Hz, 1H), 7.23 (t, <math>J = 5.9</math> Hz, 1H), 6.83 (d, <math>J = 8.9</math> Hz, 2H), 6.41 (dd, <math>J = 3.2, 1.8</math> Hz, 1H), 6.36 (dd, <math>J = 3.2, 0.7</math> Hz, 1H), 4.38 (d, <math>J = 5.9</math> Hz, 2H).</p> <p><b><math>^{13}\text{C}</math> NMR</b> (101 MHz, <math>d_6</math>-DMSO) <math>\delta</math> 176.2, 167.0 (d, <math>J = 3.0</math> Hz), 163.5, 161.1, 152.4 (d, <math>J = 32.7</math> Hz), 142.3, 131.5 (d, <math>J = 8.4</math> Hz), 129.6, 128.9 (d, <math>J = 8.5</math> Hz), 123.2 (d, <math>J = 2.8</math> Hz), 118.3 (d, <math>J = 21.2</math> Hz), 113.6 (d, <math>J = 23.5</math> Hz), 112.2, 110.4, 109.9, 107.4, 39.2.</p> | [M+H] 336.2 |
| SKL-1233 | <p><b><math>^1\text{H}</math> NMR</b> (400 MHz, <math>d_6</math>-DMSO) <math>\delta</math> 8.10 (ddd, <math>J = 8.4, 5.3, 2.5</math> Hz, 2H), 7.89 (d, <math>J = 8.8</math> Hz, 2H), 7.60 (dd, <math>J = 1.8, 0.8</math> Hz, 1H), 7.41 (t, <math>J = 8.9</math> Hz, 2H), 7.22 (t, <math>J = 5.9</math> Hz, 1H), 6.83 (d, <math>J = 8.9</math> Hz, 2H), 6.41 (dd, <math>J = 3.2, 1.8</math> Hz, 1H), 6.36 (dd, <math>J = 3.2, 0.8</math> Hz, 1H), 4.38 (d, <math>J = 5.9</math> Hz, 2H).</p> <p><b><math>^{13}\text{C}</math> NMR</b> (101 MHz, <math>d_6</math>-DMSO) <math>\delta</math> 176.0, 167.0, 165.1, 162.6, 152.4, 152.2, 142.3, 129.6, 129.5, 129.5, 123.2 (d, <math>J = 3.2</math> Hz), 116.3 (d, <math>J = 22.1</math> Hz), 112.2, 110.4, 110.0, 107.4, 39.2.</p>                                                                                                                                                                   | [M+H] 336.2 |
| SKL-1234 | <p><b><math>^1\text{H}</math> NMR</b> (400 MHz, <math>d_6</math>-DMSO) <math>\delta</math> 7.94 (d, <math>J = 8.1</math> Hz, 2H), 7.88 (d, <math>J = 8.8</math> Hz, 2H), 7.60 (dd, <math>J = 1.8, 0.8</math> Hz, 1H), 7.38 (d, <math>J = 8.0</math> Hz, 2H), 7.20 (t, <math>J = 5.9</math> Hz, 1H), 6.83 (d, <math>J = 8.9</math> Hz, 2H), 6.41 (dd, <math>J = 3.2, 1.9</math> Hz, 1H), 6.36 (d, <math>J = 3.2</math> Hz, 1H), 4.37 (d, <math>J = 5.9</math> Hz, 2H), 2.39 (s, 3H).</p> <p><b><math>^{13}\text{C}</math> NMR</b> (101 MHz, <math>d_6</math>-DMSO) <math>\delta</math> 175.8, 167.8, 152.4, 152.2, 142.3, 141.2, 129.7, 129.4, 126.9, 123.9, 112.1, 110.4, 110.2, 107.4, 39.2, 21.1.</p>                                                                                                                                                                                                                                          | [M+H] 332.2 |
| SKL-1235 | <p><b><math>^1\text{H}</math> NMR</b> (400 MHz, <math>d_6</math>-DMSO) <math>\delta</math> 7.89 (d, <math>J = 8.9</math> Hz, 3H), 7.85 (d, <math>J = 7.6</math> Hz, 1H), 7.60 (dd, <math>J = 1.7, 0.8</math> Hz, 1H), 7.45 (t, <math>J = 7.6</math> Hz, 1H), 7.40 (d, <math>J = 7.7</math> Hz, 1H), 7.21 (t, <math>J = 5.8</math> Hz, 1H), 6.83 (d, <math>J = 8.9</math> Hz, 2H), 6.41 (dd, <math>J = 3.2, 1.9</math> Hz, 1H), 6.36 (d, <math>J = 2.7</math> Hz, 1H), 4.38 (d, <math>J = 5.7</math> Hz, 2H), 2.41 (s, 3H).</p> <p><b><math>^{13}\text{C}</math> NMR</b> (151 MHz, <math>d_6</math>-DMSO) <math>\delta</math> 175.9, 167.9, 152.4, 152.3, 142.3, 138.6, 132.0, 129.5, 129.1, 127.4, 126.6, 124.2, 112.2, 110.5, 110.2, 107.4, 39.2, 20.9.</p>                                                                                                                                                                                     | [M+H] 332.2 |
| SKL-1236 | <b><math>^1\text{H}</math> NMR</b> (400 MHz, $d_6$ -DMSO) $\delta$ 7.97 (dd, $J = 7.6, 1.3$ Hz, 1H),                                                                                                                                                                                                                                                                                                                                                                                                                                                                                                                                                                                                                                                                                                                                                                                                                                             | [M+H] 332.2 |

|          |                                                                                                                                                                                                                                                                                                                                                                                                                                                                                                     |             |
|----------|-----------------------------------------------------------------------------------------------------------------------------------------------------------------------------------------------------------------------------------------------------------------------------------------------------------------------------------------------------------------------------------------------------------------------------------------------------------------------------------------------------|-------------|
|          | 7.89 (d, $J = 8.9$ Hz, 2H), 7.60 (dd, $J = 1.8, 0.9$ Hz, 1H), 7.46 (td, $J = 7.5, 1.4$ Hz, 1H), 7.44 – 7.33 (m, 2H), 7.19 (t, $J = 5.9$ Hz, 1H), 6.83 (d, $J = 8.9$ Hz, 2H), 6.41 (dd, $J = 3.2, 1.8$ Hz, 1H), 6.36 (dd, $J = 3.2, 0.8$ Hz, 1H), 4.38 (d, $J = 5.9$ Hz, 2H), 2.58 (s, 3H).<br><b><math>^{13}\text{C}</math> NMR</b> (101 MHz, $d_6$ -DMSO) $\delta$ 175.4, 169.0, 152.8, 152.7, 142.8, 137.9, 131.8, 131.1, 130.2, 129.9, 126.6, 126.5, 112.6, 110.9, 110.6, 107.8, 39.6, 22.0.     |             |
| SKL-1237 | <b><math>^1\text{H}</math> NMR</b> (400 MHz, $d_6$ -DMSO) $\delta$ 7.74 (d, $J = 8.6$ Hz, 2H), 7.59 (s, 1H), 7.12 (t, $J = 5.7$ Hz, 1H), 6.77 (d, $J = 8.7$ Hz, 2H), 6.39 (t, $J = 2.5$ Hz, 1H), 6.34 (d, $J = 2.7$ Hz, 1H), 4.34 (d, $J = 5.8$ Hz, 2H), 2.09 (tt, $J = 8.4, 4.9$ Hz, 1H), 1.10 – 1.01 (m, 2H), 1.00 – 0.87 (m, 2H).<br><b><math>^{13}\text{C}</math> NMR</b> (101 MHz, $d_6$ -DMSO) $\delta$ 175.1, 172.0, 152.3, 152.2, 142.3, 129.2, 112.1, 110.4, 110.3, 107.3, 39.2, 7.3, 6.5. | [M+H] 282.2 |
| SKL-1238 | <b><math>^1\text{H}</math> NMR</b> (400 MHz, $d_6$ -DMSO) $\delta$ 8.35 (s, 1H), 8.14 – 8.00 (m, 3H), 7.89 (d, $J = 8.8$ Hz, 2H), 7.63 – 7.52 (m, 3H), 7.16 (t, $J = 5.8$ Hz, 1H), 6.83 (d, $J = 8.9$ Hz, 2H), 4.29 (d, $J = 5.7$ Hz, 2H).<br><b><math>^{13}\text{C}</math> NMR</b> (101 MHz, $d_6$ -DMSO) $\delta$ 176.0, 167.8, 152.5, 152.3, 137.4, 136.3, 131.4, 129.5, 129.2, 127.0, 126.7, 112.2, 110.1, 38.2.                                                                                | [M+H] 319.2 |
| SKL-1239 | <b><math>^1\text{H}</math> NMR</b> (400 MHz, $d_6$ -DMSO) $\delta$ 8.32 (s, 1H), 8.06 (dd, $J = 7.3, 1.9$ Hz, 2H), 7.91 (d, $J = 8.7$ Hz, 2H), 7.63 – 7.53 (m, 3H), 7.25 (t, $J = 5.9$ Hz, 1H), 7.13 (s, 1H), 6.85 (d, $J = 8.8$ Hz, 2H), 4.48 (d, $J = 5.9$ Hz, 2H).<br><b><math>^{13}\text{C}</math> NMR</b> (101 MHz, $d_6$ -DMSO) $\delta$ 175.9, 167.9, 152.1, 151.8, 149.4, 131.4, 129.5, 129.2, 127.0, 126.7, 123.7, 112.2, 110.5, 36.8.                                                     | [M+H] 319.1 |
| SKL-1240 | <b><math>^1\text{H}</math> NMR</b> (400 MHz, $d_6$ -DMSO) $\delta$ 8.13 – 8.01 (m, 3H), 7.91 (d, $J = 8.8$ Hz, 2H), 7.64 – 7.52 (m, 3H), 7.38 (t, $J = 6.2$ Hz, 1H), 7.18 (s, 1H), 6.84 (d, $J = 8.8$ Hz, 2H), 4.55 (d, $J = 6.2$ Hz, 2H).<br><b><math>^{13}\text{C}</math> NMR</b> (101 MHz, $d_6$ -DMSO) $\delta$ 175.9, 167.9, 161.5, 152.2, 140.0, 131.4, 129.5, 129.2, 127.0, 127.0, 126.6, 112.3, 110.7, 39.4.                                                                                | [M+H] 319.2 |
| SKL-1241 | <b><math>^1\text{H}</math> NMR</b> (400 MHz, $d_6$ -DMSO) $\delta$ 8.51 (s, 1H), 8.06 (dd, 2H), 7.92 (d, $J = 8.6$ Hz, 2H), 7.64 – 7.52 (m, 3H), 7.39 (t, $J = 6.0$ Hz, 1H), 6.84 (d, $J = 8.6$ Hz, 2H), 6.41 (s, 1H), 4.61 (d, $J = 6.0$ Hz, 2H).<br><b><math>^{13}\text{C}</math> NMR</b> (151 MHz, $d_6$ -DMSO) $\delta$ 175.9, 169.5, 167.9, 152.1, 150.9, 131.4, 129.6, 129.2, 127.0, 126.6, 112.4, 110.8, 101.8, 38.0.                                                                        | [M+H] 319.2 |
| SKL-1242 | <b><math>^1\text{H}</math> NMR</b> (400 MHz, $\text{CDCl}_3$ ) $\delta$ 8.16 (dd, $J = 6.7, 3.0$ Hz, 2H), 8.06 (d, $J = 8.7$ Hz, 2H), 7.54 – 7.45 (m, 3H), 7.02 (d, $J = 1.0$ Hz, 1H), 6.91 (d, $J = 1.1$ Hz, 1H), 6.80 (d, $J = 8.8$ Hz, 2H), 5.12 (s, 1H), 4.41 (d, $J = 4.6$ Hz, 2H), 3.68 (s, 3H).<br><b><math>^{13}\text{C}</math> NMR</b> (101 MHz, $\text{CDCl}_3$ ) $\delta$ 176.2, 168.8, 151.2, 144.1, 131.0, 130.1, 128.9, 127.6 (two carbons), 127.5, 121.9, 113.5, 112.7, 40.3, 32.7.  | [M+H] 332.3 |
| SKL-1243 | <b><math>^1\text{H}</math> NMR</b> (400 MHz, $d_6$ -DMSO) $\delta$ 8.06 (dd, $J = 7.4, 2.2$ Hz, 2H), 7.89 (d, $J = 8.8$ Hz, 2H), 7.64 – 7.52 (m, 3H), 7.40 (dd, $J = 5.1, 1.2$ Hz, 1H), 7.36 (t, $J = 5.7$ Hz, 1H), 7.09 (dd, 1H), 6.99 (dd, $J = 5.0,$                                                                                                                                                                                                                                             | [M+H] 334.1 |

|          |                                                                                                                                                                                                                                                                                                                                                                                                                                                                                                                                                               |             |
|----------|---------------------------------------------------------------------------------------------------------------------------------------------------------------------------------------------------------------------------------------------------------------------------------------------------------------------------------------------------------------------------------------------------------------------------------------------------------------------------------------------------------------------------------------------------------------|-------------|
|          | 3.5 Hz, 1H), 6.82 (d, $J = 8.9$ Hz, 2H), 4.58 (d, $J = 5.9$ Hz, 2H).<br><b><math>^{13}\text{C}</math> NMR</b> (101 MHz, $d_6$ -DMSO) $\delta$ 175.9, 167.8, 152.3, 142.9, 131.4, 129.5, 129.2, 127.0, 126.9, 126.7, 125.3, 124.9, 112.3, 110.2, 41.2.                                                                                                                                                                                                                                                                                                         |             |
| SKL-1244 | <b><math>^1\text{H}</math> NMR</b> (400 MHz, $d_6$ -DMSO) $\delta$ 7.99 (d, $J = 8.9$ Hz, 2H), 7.87 (d, $J = 8.8$ Hz, 2H), 7.40 (dd, $J = 5.1, 1.2$ Hz, 1H), 7.34 (t, $J = 5.9$ Hz, 1H), 7.15 – 7.06 (m, 3H), 6.99 (dd, $J = 5.0, 3.5$ Hz, 1H), 6.81 (d, $J = 8.9$ Hz, 2H), 4.58 (d, $J = 5.9$ Hz, 2H), 3.83 (s, 3H).<br><b><math>^{13}\text{C}</math> NMR</b> (101 MHz, $d_6$ -DMSO) $\delta$ 175.6, 167.5, 161.6, 152.2, 142.9, 129.5, 128.7, 126.9, 125.3, 124.9, 119.0, 114.6, 112.3, 110.4, 55.4, 41.2.                                                  | [M+H] 364.1 |
| SKL-1245 | <b><math>^1\text{H}</math> NMR</b> (400 MHz, $d_6$ -DMSO) $\delta$ 8.05 (dd, $J = 7.5, 2.1$ Hz, 2H), 7.91 (d, $J = 8.8$ Hz, 2H), 7.77 (d, $J = 3.3$ Hz, 1H), 7.66 – 7.52 (m, 5H), 6.82 (d, $J = 8.8$ Hz, 2H), 4.73 (d, $J = 6.2$ Hz, 2H).<br><b><math>^{13}\text{C}</math> NMR</b> (101 MHz, $d_6$ -DMSO) $\delta$ 175.9, 170.6, 167.9, 152.1, 142.6, 131.5, 129.7, 129.2, 127.1, 126.6, 120.2, 112.5, 110.9, 44.2.                                                                                                                                           | [M+H] 335.2 |
| SKL-1246 | <b><math>^1\text{H}</math> NMR</b> (400 MHz, $\text{CDCl}_3$ ) $\delta$ 8.16 (dd, $J = 6.6, 3.2$ Hz, 2H), 8.01 (d, $J = 8.8$ Hz, 2H), 7.55 – 7.42 (m, 3H), 7.31 – 7.25 (m, 2H), 6.98 – 6.88 (m, 2H), 6.71 (d, $J = 8.8$ Hz, 2H), 4.69 (t, $J = 5.7$ Hz, 1H), 4.42 (d, $J = 5.9$ Hz, 2H), 3.88 (s, 3H).<br><b><math>^{13}\text{C}</math> NMR</b> (101 MHz, $\text{CDCl}_3$ ) $\delta$ 176.3, 168.7, 157.5, 152.0, 131.0, 130.1, 129.0, 128.9, 128.8, 127.6, 126.2, 120.8, 112.7, 112.6, 110.6, 77.4, 55.5, 43.1.                                               | [M+H] 358.2 |
| SKL-1247 | <b><math>^1\text{H}</math> NMR</b> (400 MHz, $d_6$ -DMSO) $\delta$ 9.34 (s, 1H), 8.05 (dd, $J = 7.4, 2.2$ Hz, 2H), 7.86 (d, $J = 8.8$ Hz, 2H), 7.63 – 7.52 (m, 3H), 7.21 (t, $J = 5.7$ Hz, 1H), 7.17 (d, $J = 8.4$ Hz, 2H), 6.74 (t, $J = 9.0$ Hz, 4H), 4.25 (d, $J = 5.7$ Hz, 2H).<br><b><math>^{13}\text{C}</math> NMR</b> (101 MHz, $d_6$ -DMSO) $\delta$ 176.0, 167.8, 156.4, 152.8, 131.4, 129.5, 129.2, 129.0, 128.6, 127.0, 126.7, 115.2, 112.1, 109.6, 45.5.                                                                                          | [M+H] 344.2 |
| SKL-1248 | <b><math>^1\text{H}</math> NMR</b> (400 MHz, $\text{CDCl}_3$ ) $\delta$ 8.16 (dd, $J = 6.7, 3.0$ Hz, 2H), 8.04 (d, $J = 8.8$ Hz, 2H), 7.54 – 7.44 (m, 3H), 7.31 (d, $J = 7.1$ Hz, 1H), 7.27 – 7.16 (m, 3H), 6.71 (d, $J = 8.8$ Hz, 2H), 4.38 (s, 3H), 2.39 (s, 3H).<br><b><math>^{13}\text{C}</math> NMR</b> (101 MHz, $\text{CDCl}_3$ ) $\delta$ 176.3, 168.8, 151.7, 138.7, 138.2, 131.0, 130.2, 128.9, 128.5, 128.4, 127.6, 127.6, 124.6, 113.1, 112.5, 77.4, 47.8, 21.7.                                                                                  | [M+H] 342.2 |
| SKL-1249 | <b><math>^1\text{H}</math> NMR</b> (400 MHz, $\text{CDCl}_3$ ) $\delta$ 8.15 (dd, $J = 5.4, 2.2$ Hz, 2H), 8.02 (d, $J = 8.8$ Hz, 2H), 7.54 – 7.44 (m, 3H), 7.34 (dd, $J = 8.6, 5.4$ Hz, 2H), 7.06 (t, $J = 8.7$ Hz, 2H), 6.70 (d, $J = 8.8$ Hz, 2H), 4.56 (s, 1H), 4.40 (d, $J = 5.5$ Hz, 2H).<br><b><math>^{13}\text{C}</math> NMR</b> (101 MHz, $\text{CDCl}_3$ ) $\delta$ 176.2, 168.8, 162.4 (d, $J = 245.8$ Hz), 151.4, 134.0 (d, $J = 3.1$ Hz), 131.0, 130.2, 129.2 (d, $J = 8.1$ Hz), 128.9, 127.6 (d, $J = 7.9$ Hz), 115.9 (d, $J = 21.5$ Hz), 113.3, | [M+H] 346.2 |



|          |                                                                                                                                                                                                                                                                                                                                                                                                                                                                                                                                                                            |                          |
|----------|----------------------------------------------------------------------------------------------------------------------------------------------------------------------------------------------------------------------------------------------------------------------------------------------------------------------------------------------------------------------------------------------------------------------------------------------------------------------------------------------------------------------------------------------------------------------------|--------------------------|
|          | 112.6, 77.4, 47.1.                                                                                                                                                                                                                                                                                                                                                                                                                                                                                                                                                         |                          |
| SKL-1250 | <sup>1</sup> H NMR (400 MHz, CDCl <sub>3</sub> ) $\delta$ 8.15 (dd, $J$ = 5.2, 2.1 Hz, 2H), 8.01 (d, $J$ = 8.8 Hz, 2H), 7.54 – 7.44 (m, 3H), 6.72 – 6.63 (m, 4H), 6.54 (dt, $J$ = 10.5, 2.2 Hz, 1H), 4.67 (s, 1H), 4.38 (s, 2H), 3.78 (s, 3H).<br><sup>13</sup> C NMR (101 MHz, CDCl <sub>3</sub> ) $\delta$ 175.2, 167.8, 163.1 (d, $J$ = 245.8 Hz), 160.4 (d, $J$ = 11.2 Hz), 150.4, 140.7 (d, $J$ = 9.0 Hz), 130.0, 129.2, 127.9, 126.6, 126.5, 112.4, 111.6, 107.9 (d, $J$ = 2.6 Hz), 105.3 (d, $J$ = 22.3 Hz), 99.6 (d, $J$ = 25.2 Hz), 54.7, 46.4 (d, $J$ = 2.2 Hz). | [M+H] <sup>+</sup> 376.2 |
| SKL-1251 | <sup>1</sup> H NMR (400 MHz, <i>d</i> <sub>6</sub> -DMSO) $\delta$ 8.04 (dd, $J$ = 7.5, 2.1 Hz, 2H), 7.89 (t, $J$ = 9.1 Hz, 4H), 7.62 (d, $J$ = 8.3 Hz, 2H), 7.62 – 7.52 (m, 3H), 7.46 (t, $J$ = 6.1 Hz, 1H), 6.76 (d, $J$ = 8.8 Hz, 2H), 4.53 (d, $J$ = 6.1 Hz, 2H), 3.19 (s, 3H).<br><sup>13</sup> C NMR (101 MHz, <i>d</i> <sub>6</sub> -DMSO) $\delta$ 175.9, 167.9, 152.4, 145.7, 139.5, 131.4, 129.7, 129.2, 127.9, 127.2, 127.0, 126.7, 112.3, 110.3, 45.3, 43.6.                                                                                                   | [M+H] <sup>+</sup> 406.2 |
| SKL-1252 | <sup>1</sup> H NMR (400 MHz, CDCl <sub>3</sub> ) $\delta$ 8.66 (s, 1H), 8.57 (d, $J$ = 4.3 Hz, 1H), 8.15 (dd, $J$ = 5.4, 2.2 Hz, 2H), 8.03 (d, $J$ = 8.8 Hz, 2H), 7.70 (dt, $J$ = 8.2, 2.0 Hz, 1H), 7.55 – 7.44 (m, 3H), 7.31 (dd, $J$ = 7.7, 4.8 Hz, 1H), 6.71 (d, $J$ = 8.8 Hz, 2H), 4.60 (s, 1H), 4.48 (d, $J$ = 5.0 Hz, 2H).<br><sup>13</sup> C NMR (101 MHz, CDCl <sub>3</sub> ) $\delta$ 176.1, 168.8, 151.2, 149.3, 149.2, 135.2, 133.9, 131.1, 130.2, 128.9, 127.6, 127.5, 123.8, 113.7, 112.7, 45.4.                                                              | [M+H] <sup>+</sup> 329.2 |

### Chemical synthesis section

**General Methods:** Unless otherwise stated, all reactions were performed in the appropriate oven-dried glassware. All reagents were obtained commercially as reagent grade and used without further purification. The required starting material and anhydrous solvent were purchased from Energy chemical company. All synthetic transformations were monitored by thin layer chromatography. Column chromatography was performed on silica gel (100 - 200 mesh) that was packed into glass columns. The <sup>1</sup>H and <sup>13</sup>C NMR spectroscopic were recorded in either CDCl<sub>3</sub> or *d*<sub>6</sub>-DMSO as the solvent at 400 or 600 MHz (for <sup>1</sup>H NMR) and 101 or 151 MHz (for <sup>13</sup>C NMR), respectively. Chemical shifts ( $\delta$ ) are reported in units of ppm relative to the residual protio solvent signal for <sup>1</sup>H NMR (for CHCl<sub>3</sub>:  $\delta$  = 7.26 ppm; for *d*<sub>6</sub>-DMSO:  $\delta$  = 2.50 ppm) and solvent signal for <sup>13</sup>C NMR (for CDCl<sub>3</sub>:  $\delta$  = 77.16 ppm; for *d*<sub>6</sub>-DMSO:  $\delta$  = 39.52 ppm). The multiplicities of the signals are reported as s (singlet or broad singlet), d (doublet), dd (doublet of doublets), ddd (doublet of doublets of doublets), q (quartet), t (triplet), td (triplet of doublets), tt (triplet of triplets), tdd (triplet of doublets of doublets), m (multiplet), br (broad). And the coupling constants are provided in ( $J$ ) Hz. The mass spectral data was obtained by Agilent LC-ESI-MS 1260 Infinity II system.

### Synthetic route of SKL-1201 and SKL-1223

#### Synthesis of int-1:

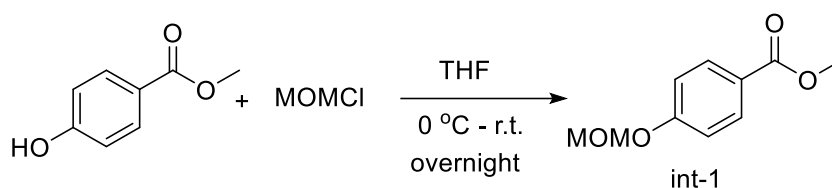

To a solution of methylparaben (20.0 mmol, 3.043 g) in dry THF the NaH (60%, dispersion in mineral oil, 1.5 equiv, 1.200g) was added slowly at 0 °C. After 30 minutes, the MOMCl (chloromethyl methyl ether, 1.2 equiv, 1.9 mL) was added to the mixture dropwise, then the reaction system was warmed up to room temperature and stirred continuously at this temperature overnight. After the reaction finished, quenched the reaction with saturated  $\text{NH}_4\text{Cl}$  solution, and extracted with EtOAc ( $5 \times 10.0$  mL). The combined organic layer was washed with saturated brine solution ( $2 \times 10.0$  mL) and dried over anhydrous  $\text{Na}_2\text{SO}_4$ . Next, the crude organic phase was concentrated and purified by flash column chromatography eluting with petroleum ether : EtOAc = 30 : 1 to give the compound **int-1** (3.775 g, 96 %) as a colorless oil.  $R_f$  = 0.42 (petroleum ether : EtOAc = 20 : 1).

#### Synthesis of int-2:

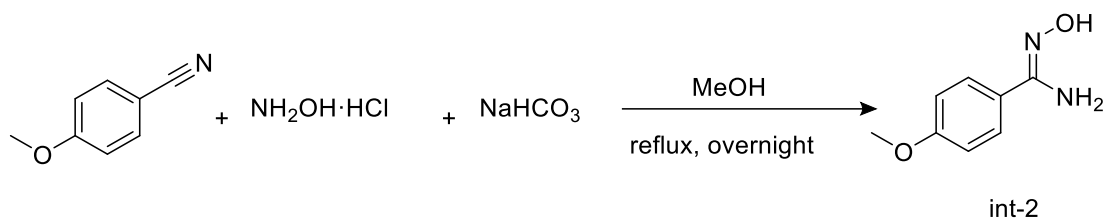

To a solution of  $\text{NH}_2\text{OH} \cdot \text{HCl}$  (2.0 equiv, 1.390 g) in MeOH (20 mL) was added the  $\text{NaHCO}_3$  (2.0 equiv, 1.680 g) one portion, then the reaction mixture was stirred at room temperature for 30 minutes. Next, to the mixture was added the anisonitrile (10.00 mmol, 1.331 g), and the resulting mixture was refluxed overnight. After the reflux was completed, the solvent was removed in vacuo to obtain the crude product **int-2**, which was used in the next step without further purification.

#### Synthesis of int-3:

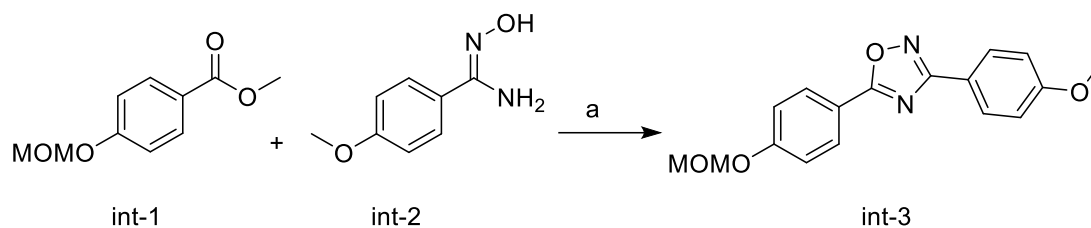

To a solution of **int-1** (1.5 equiv, 19.33 mmol, 3.793 g) and **int-2** (12.89 mmol, 2.142 g) in DMSO (32 mL) was added the powder of NaOH (1.5 equiv, 1.184 g) immediately, then the resulting mixture was stirred at room temperature for 6 hours. After the reaction was completed, cold water (100 mL) was added to the resulting reaction mixture, and then the desired product was precipitated. The resulting slurry was filtered under reduced pressure and the filter cake washed with cold water and petroleum ether. Finally, the filter cake was dried under the vacuum condition to give the pure compound **int-3** (3.876 g, 71 %) as a white powder.  $R_f$  = 0.55 (petroleum ether : EtOAc = 5 : 1).

#### Synthesis of int-4:

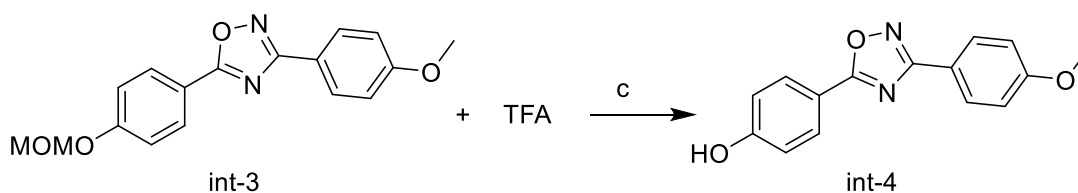

To a solution of **int-3** (8.24 mmol, 2.573 g) in DCM (30 mL) the TFA (21 mL) was added dropwise at 0 °C. Then the mixture was stirred at room temperature for 6 hours (monitored by thin layer chromatography). After the reaction was completed, to neutralize the reaction system with saturated NaHCO<sub>3</sub> solution. Next, the mixture was poured into the funnel and these two phases were separated. And the water layer was extracted with DCM, the combined organic extract was dried over anhydrous Na<sub>2</sub>SO<sub>4</sub>, then removed the solvent under reduced pressure. Finally, the white powder was precipitated after to the residue was added cold petroleum ether. The resulting mixture was filtered under reduced pressure and the filter cake was washed with cold water and petroleum ether. The filter cake was dried under the vacuum condition to give the pure product **int-4** (2.157 g, 98 %) as a white powder. R<sub>f</sub> = 0.14 (petroleum ether : EtOAc = 5 : 1).

#### Synthesis of int-5:

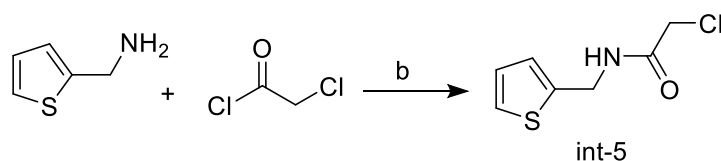

To a solution of 2-thiophenemethylamine (20.00 mmol, 2.1 mL) and K<sub>2</sub>CO<sub>3</sub> (1.5 equiv, 1.146 g) in dry acetonitrile (35 mL) the chloroacetyl chloride (1.2 equiv, 1.9 mL) was added dropwise at 0 °C. Then the reaction system was warmed up to room temperature and stirred at this temperature overnight. After the reaction was completed, removed the solvent under reduced pressure and then diluted the residue with EtOAc. Next, the mixture was washed with water (2 × 10.0 mL), saturated NaHCO<sub>3</sub> solution (2 × 10.0 mL) and saturated brine (2 × 10.0 mL), the combined water phase was extracted with EtOAc (3 × 10.0 mL), these organic extracts were combined and dried over anhydrous Na<sub>2</sub>SO<sub>4</sub>. Finally, removed the solvent under reduced pressure, the residue was purified by flash column chromatography eluting with petroleum ether : EtOAc = 2 : 1 to obtain the compound **int-5** (2.782 g, 74 %) as a white powder. R<sub>f</sub> = 0.41 (petroleum ether : EtOAc = 3 : 1).

#### Synthesis of SKL1201:

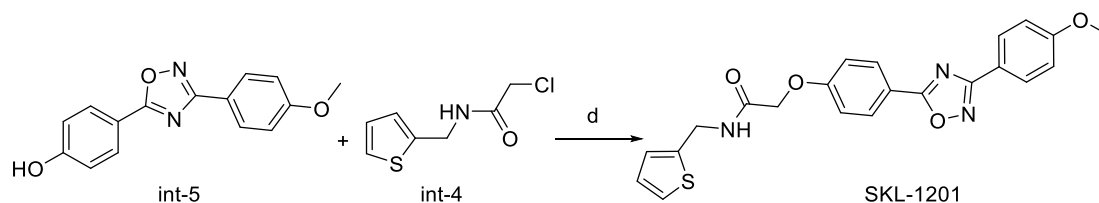

To a solution of **int-5** (0.12 mmol, 32 mg) and K<sub>2</sub>CO<sub>3</sub> (1.5 equiv, 25 mg) in dry acetonitrile (0.5 mL), which was stirred beforehand for 10 minutes, the **int-4** (2.5 equiv, 57 mg) was added at room temperature. Then the reaction mixture was refluxed overnight. After the reaction was finished (monitored by thin



ether : EtOAc = 2 : 1).

### Synthesis of SKL-1223:

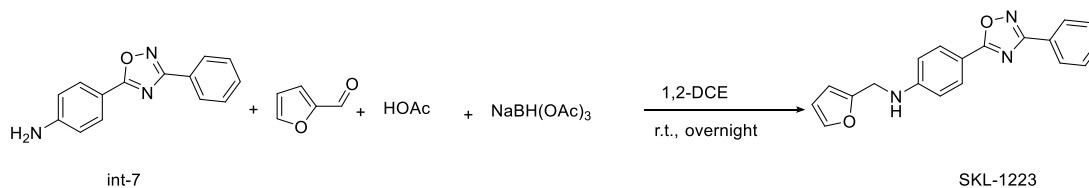

To a solution of **int-7** (1.00 mmol, 237 mg) in dry 1,2-dichloroethane (10 mL) was added furfural (1.2 equiv, 99  $\mu$ L) and acetic acid (4.0 equiv, 229  $\mu$ L) sequentially. Then the resulting mixture was stirred at room temperature for 4 hours. After this procedure finished,  $\text{NaBH}(\text{OAc})_3$  (2.0 equiv, 424 mg) was added to the reaction system and then the whole mixture was stirred at room temperature overnight. Next, the reaction system was diluted with DCM, neutralized with saturated  $\text{NaHCO}_3$  solution, washed with water ( $2 \times 10.0$  mL), saturated  $\text{NH}_4\text{Cl}$  solution ( $2 \times 10.0$  mL) and saturated brine ( $2 \times 10.0$  mL). The combined aqueous phase was combined and extracted with DCM ( $3 \times 5.0$  mL). These organic extracts were combined and dried over anhydrous  $\text{Na}_2\text{SO}_4$ , then filtered and concentrated. The resulting residue was purified by flash column chromatography eluting with petroleum ether : EtOAc = 10 : 1 to obtain the compound **SKL-1223** (197 mg, 62%) as a pale yellow powder.  $R_f$  = 0.17 (petroleum ether : EtOAc = 10 : 1).

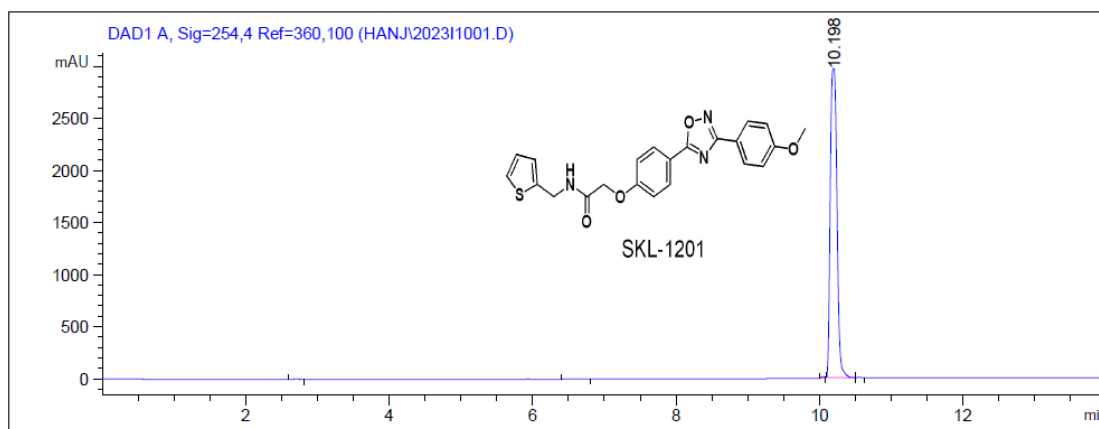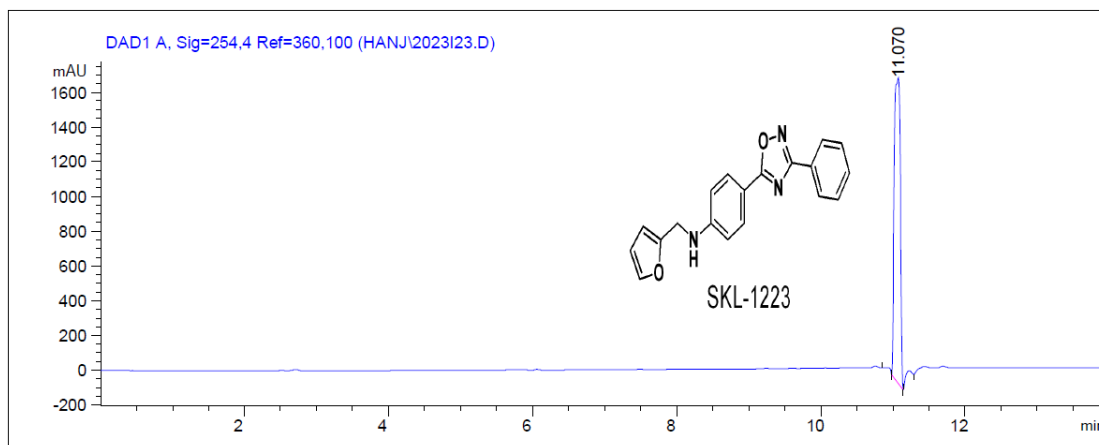

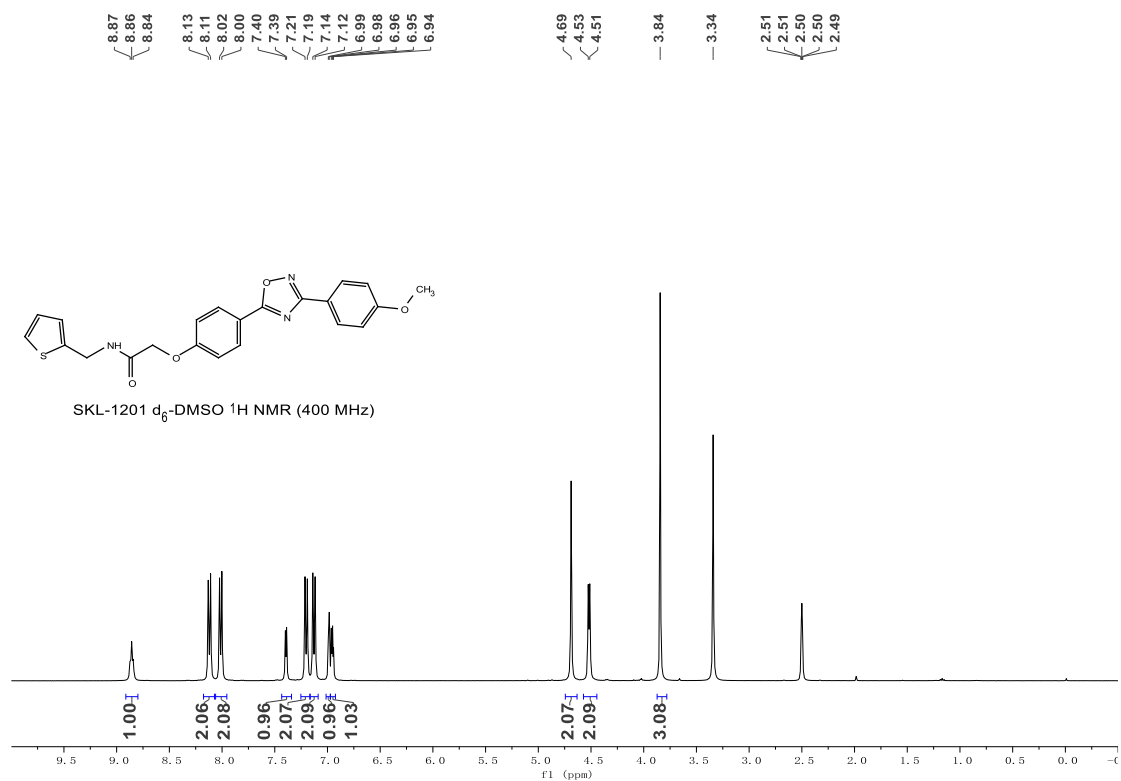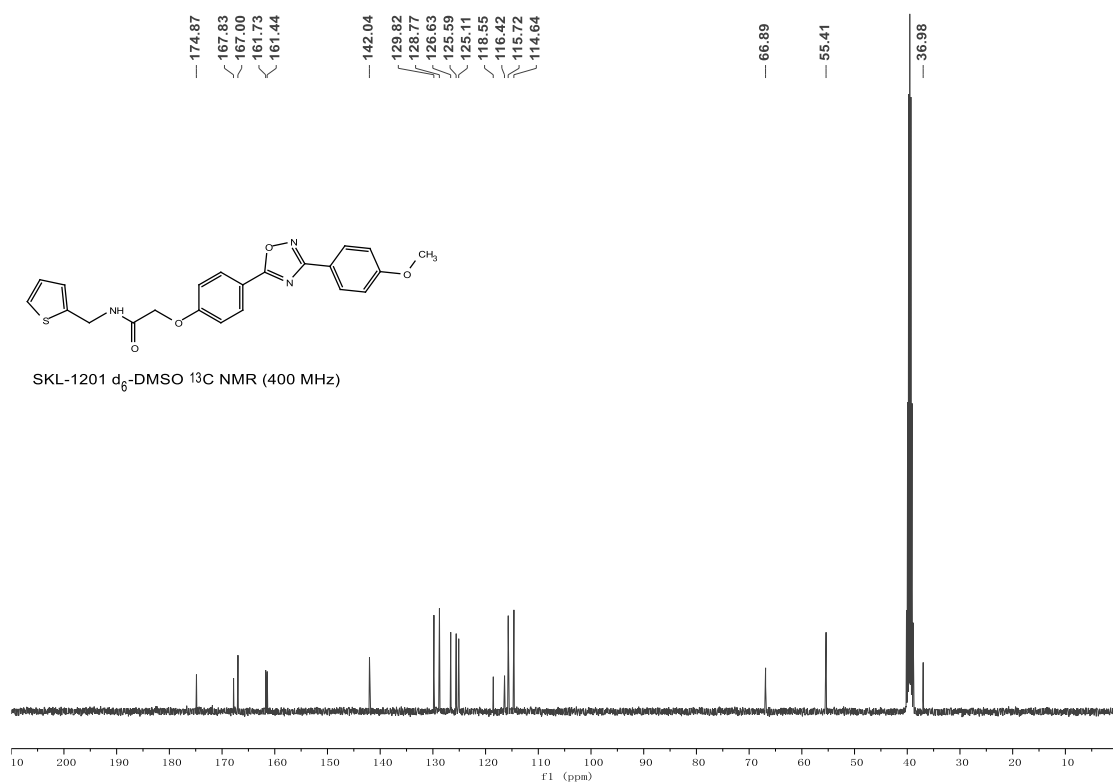

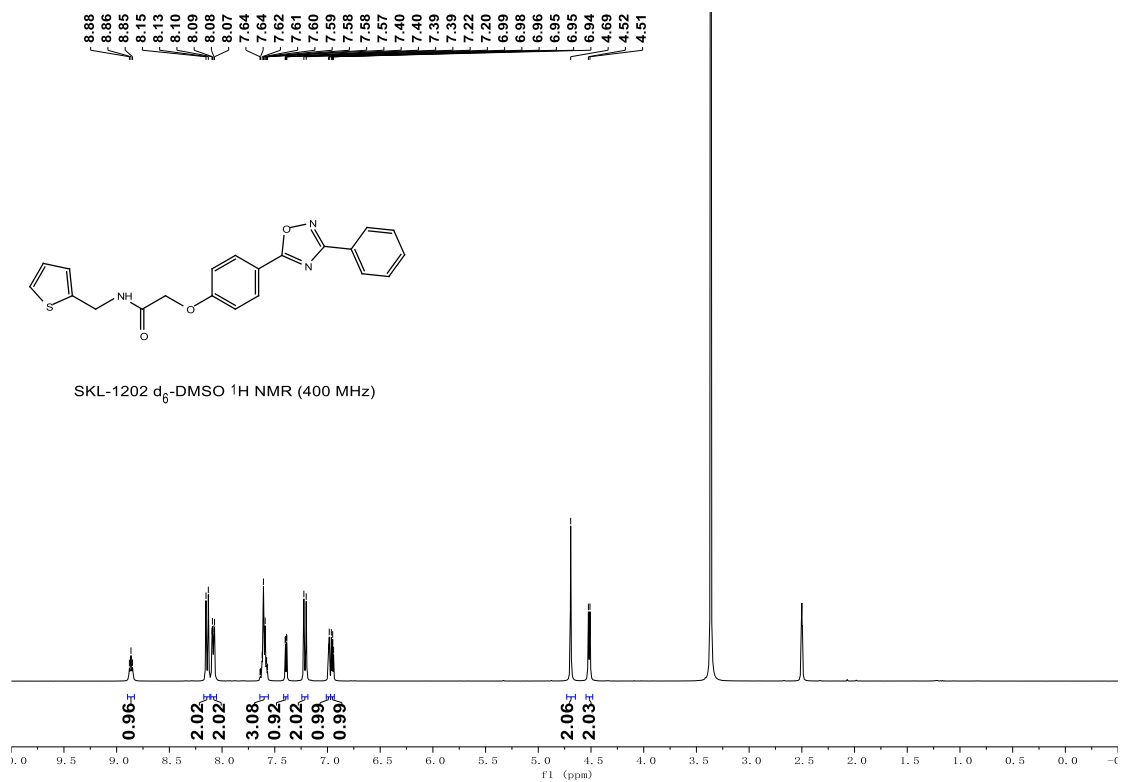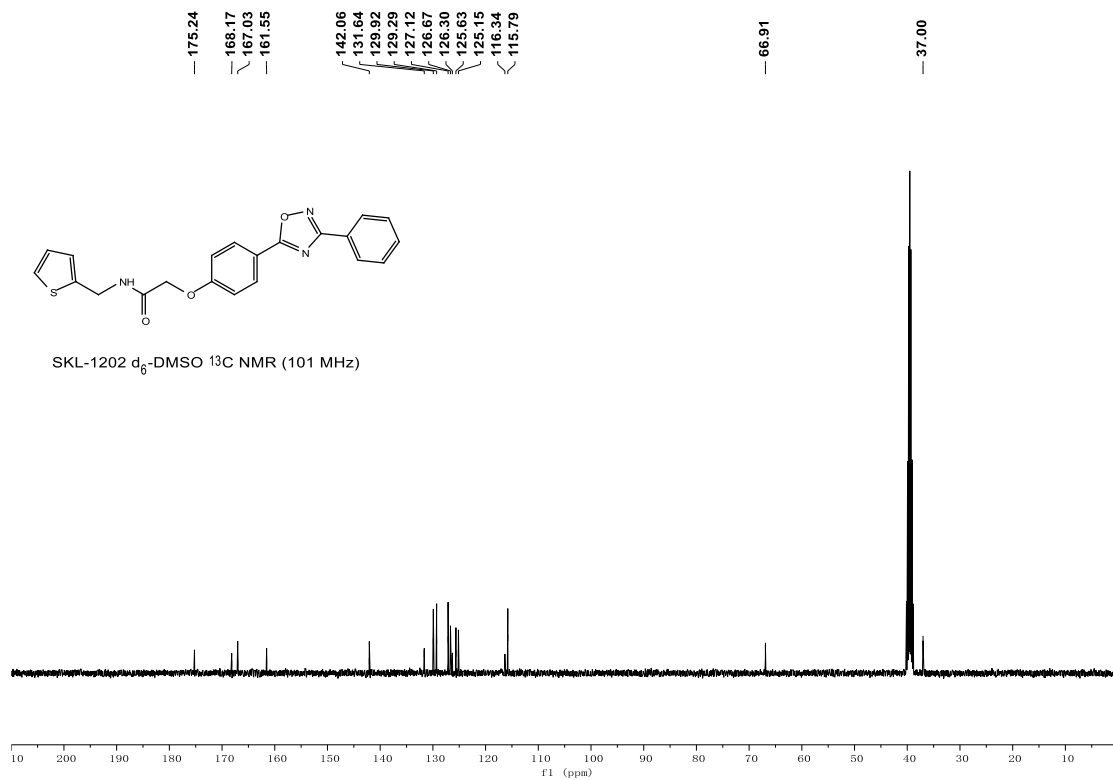

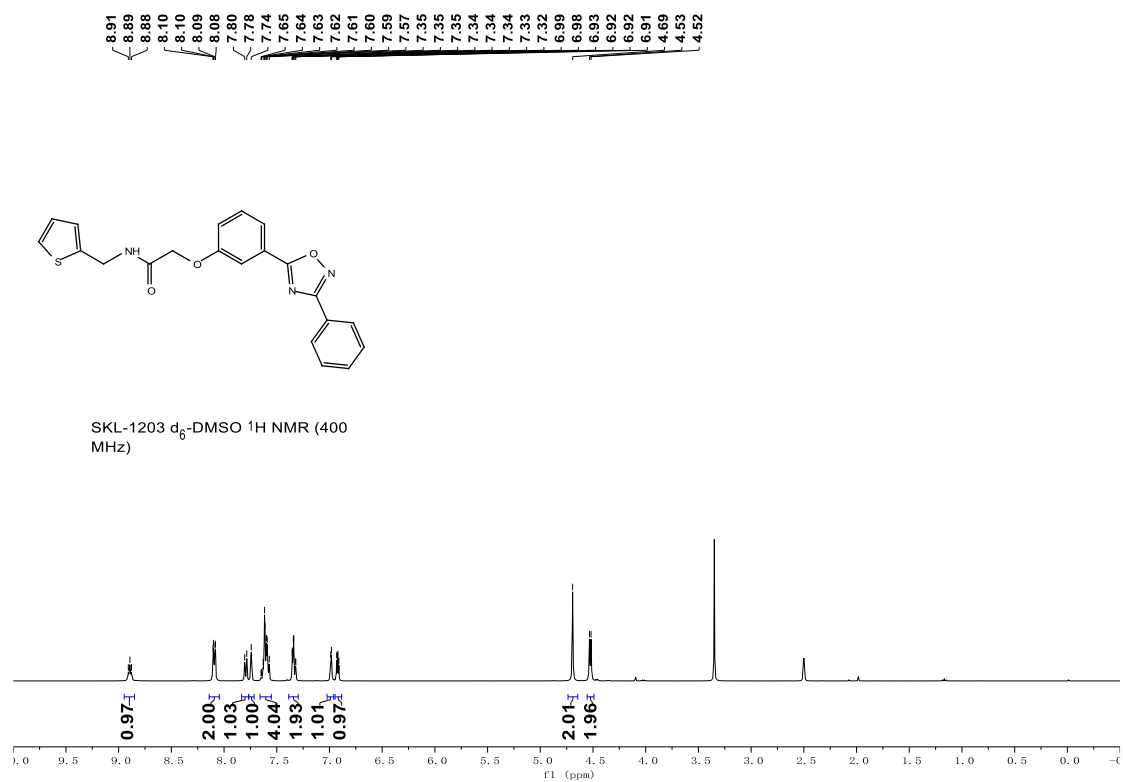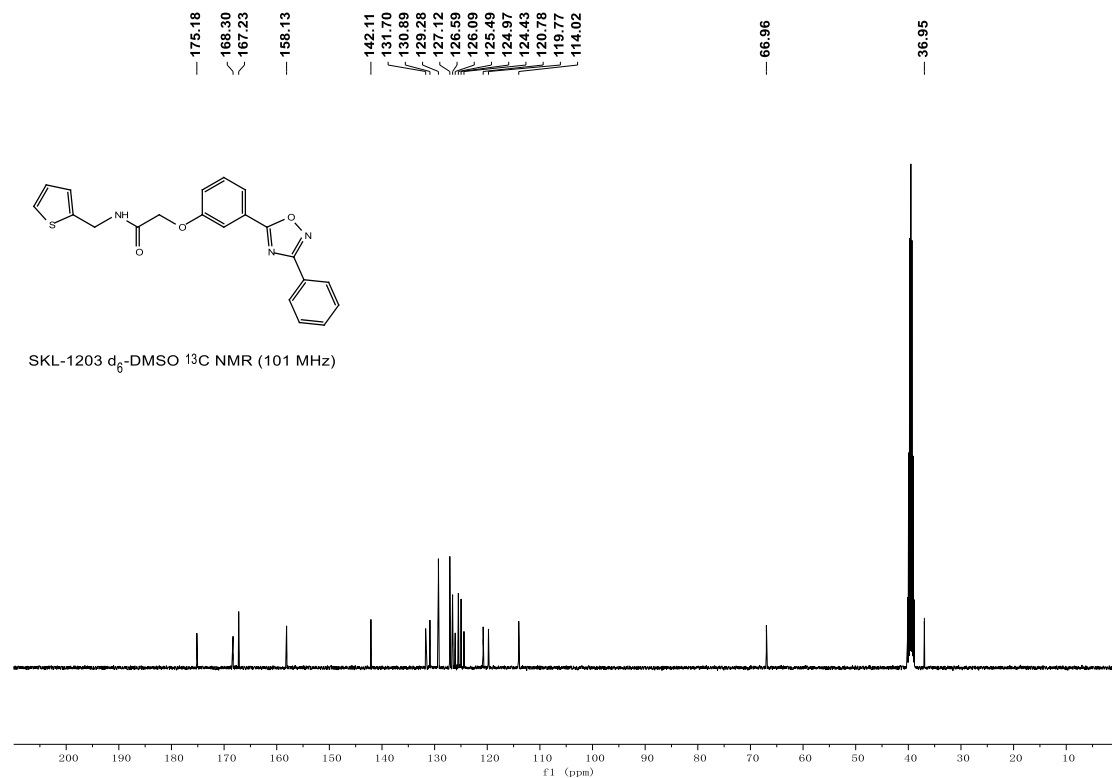



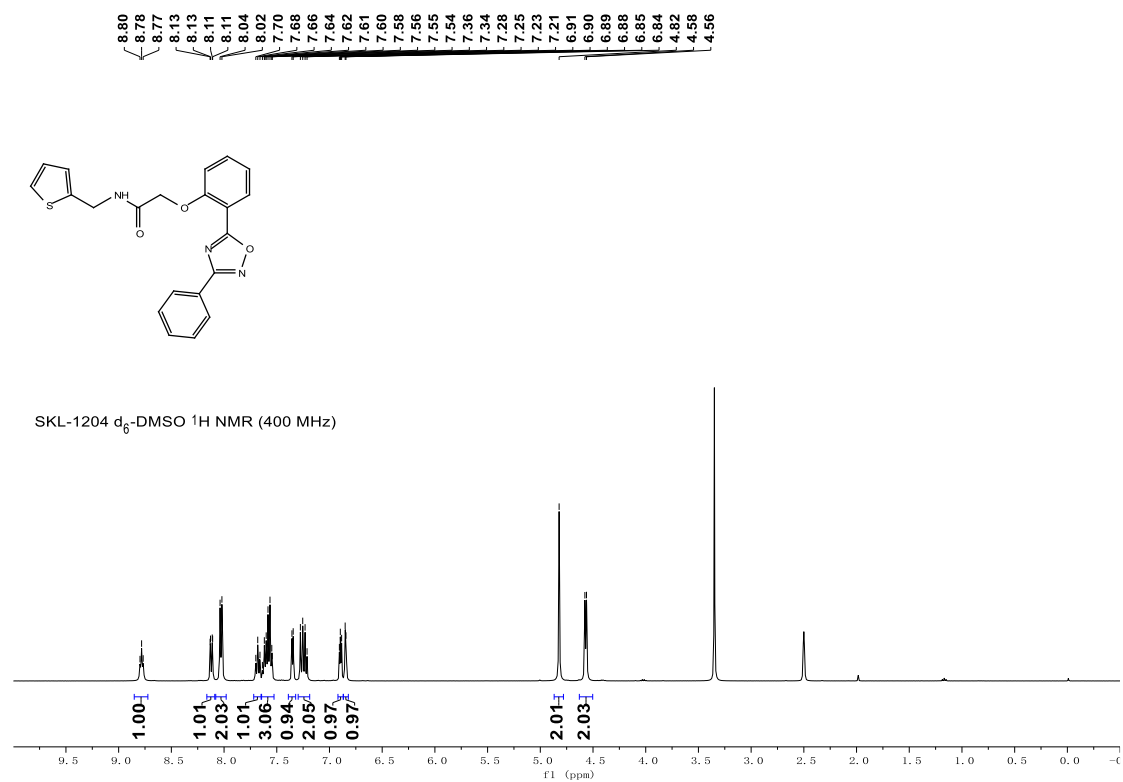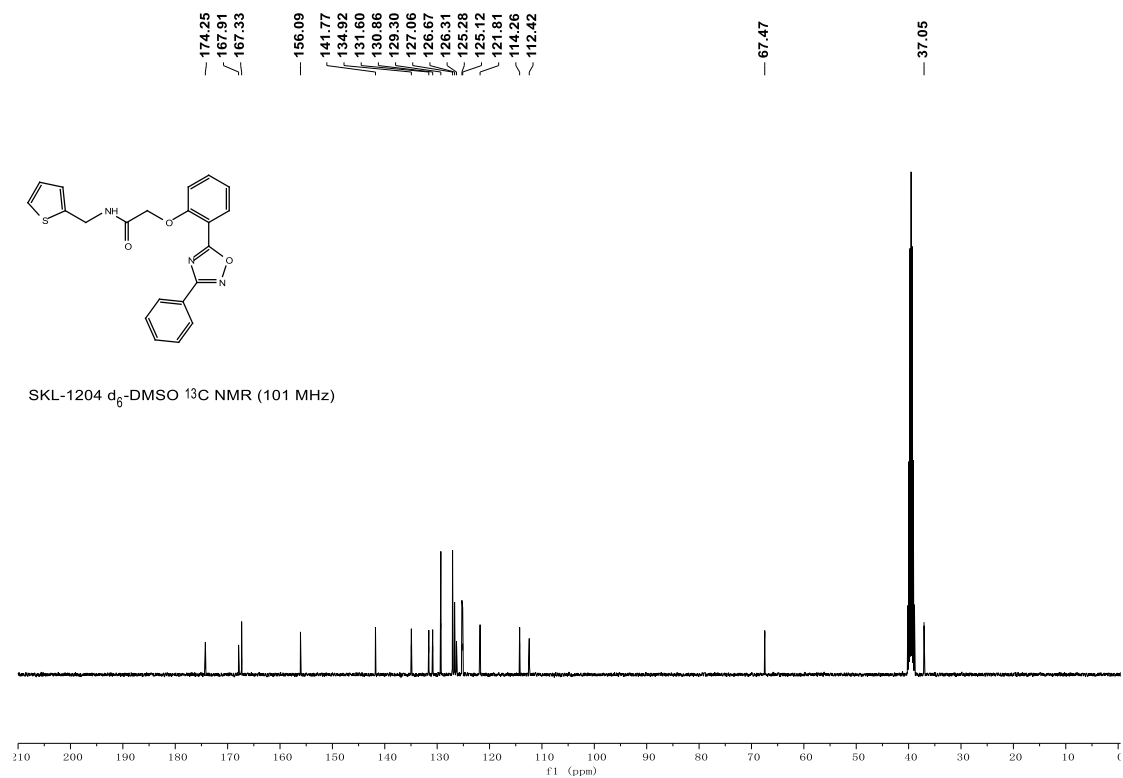

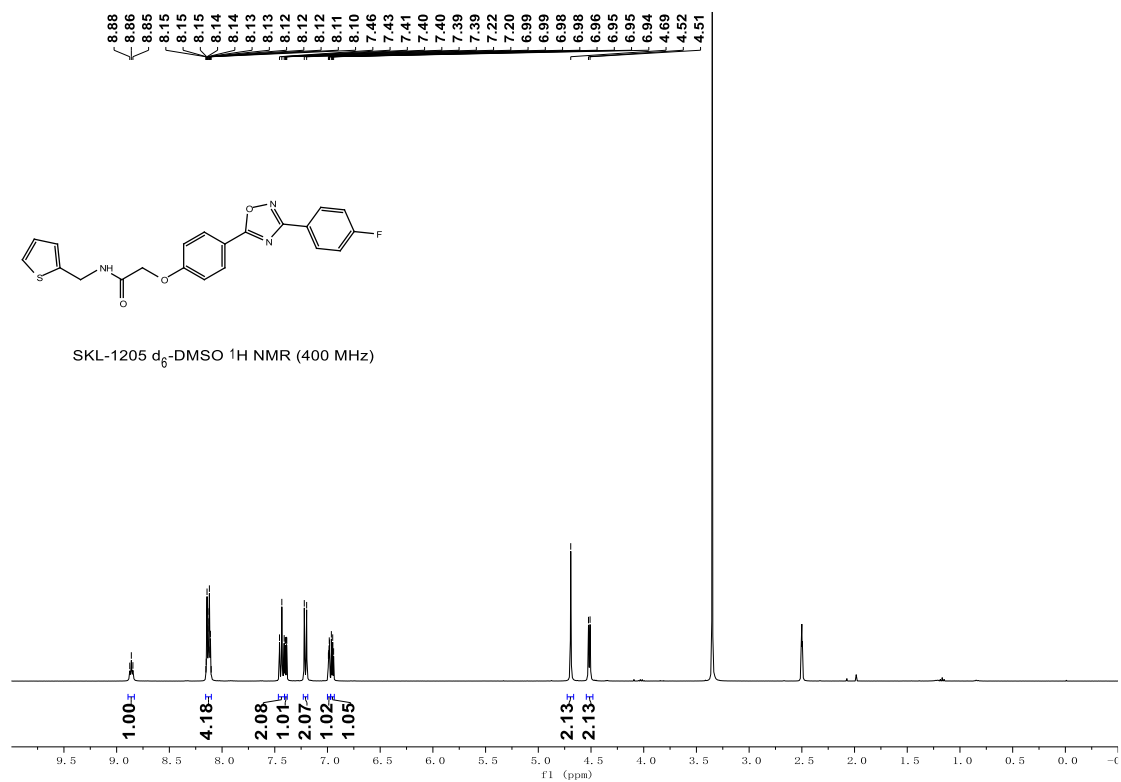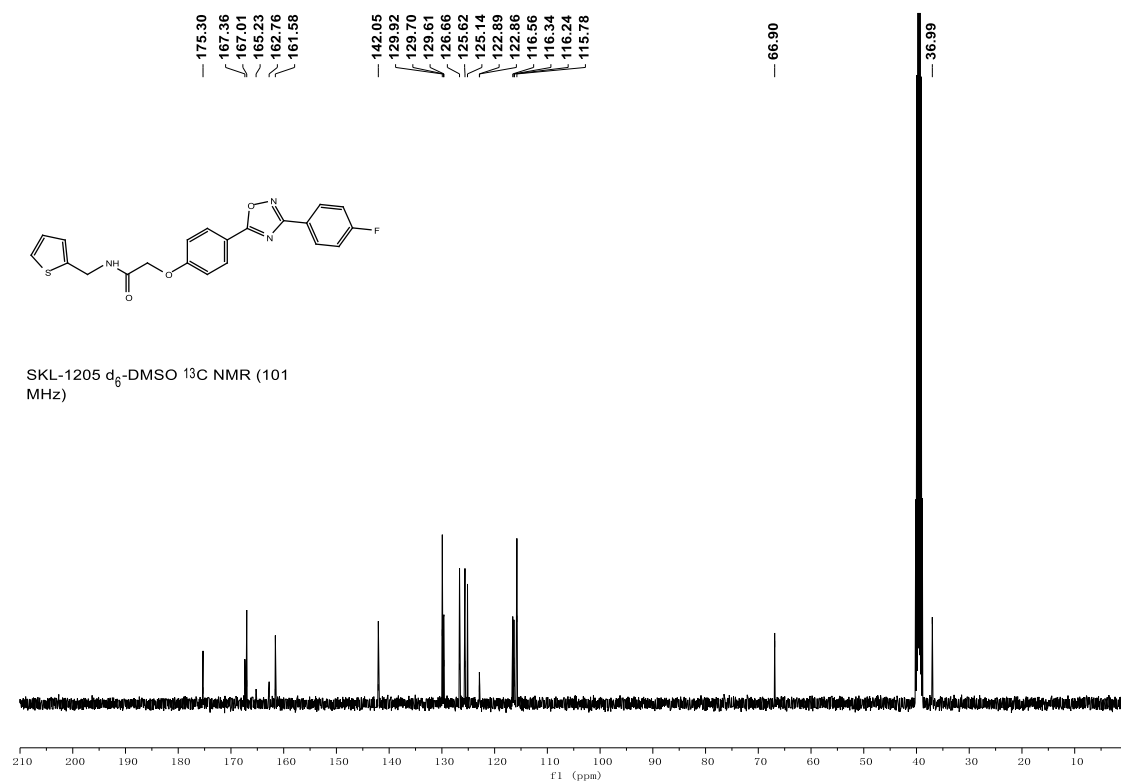

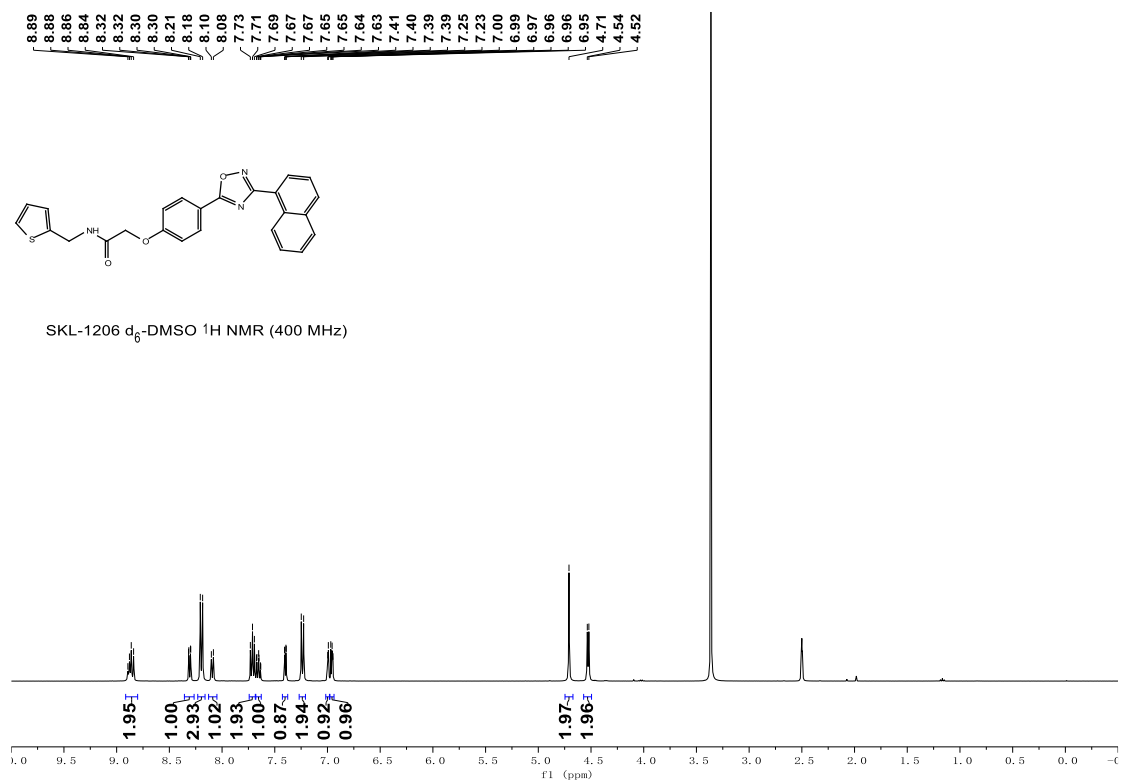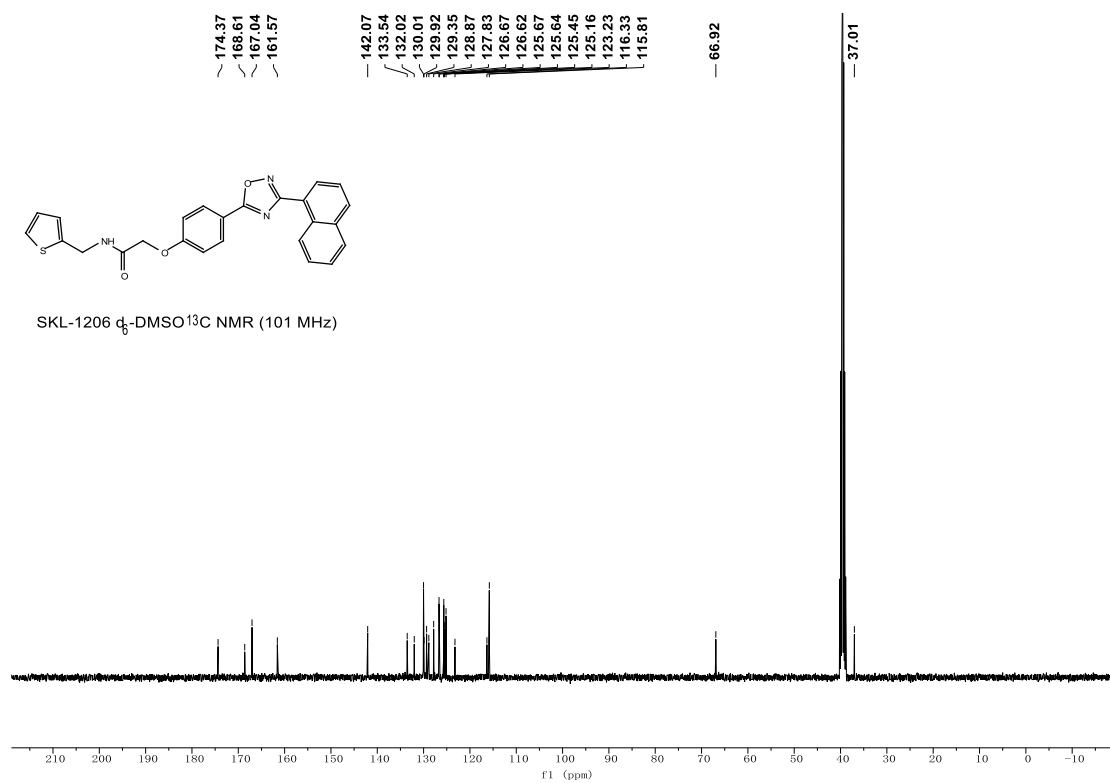

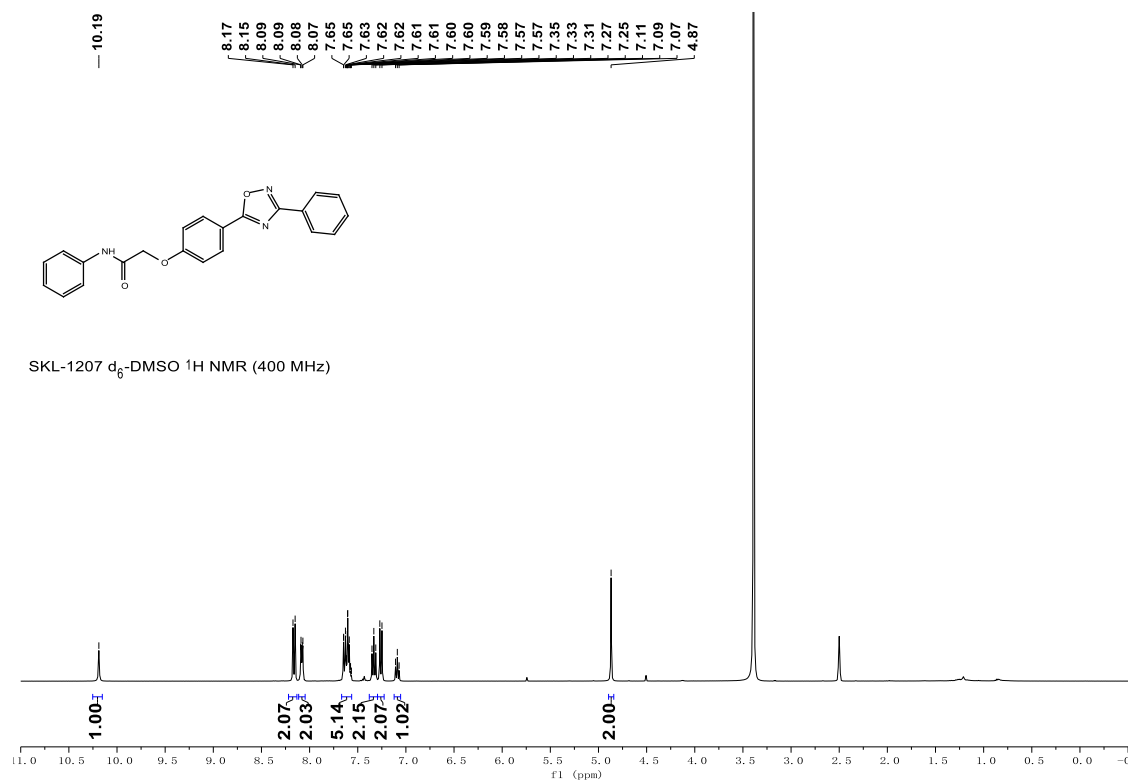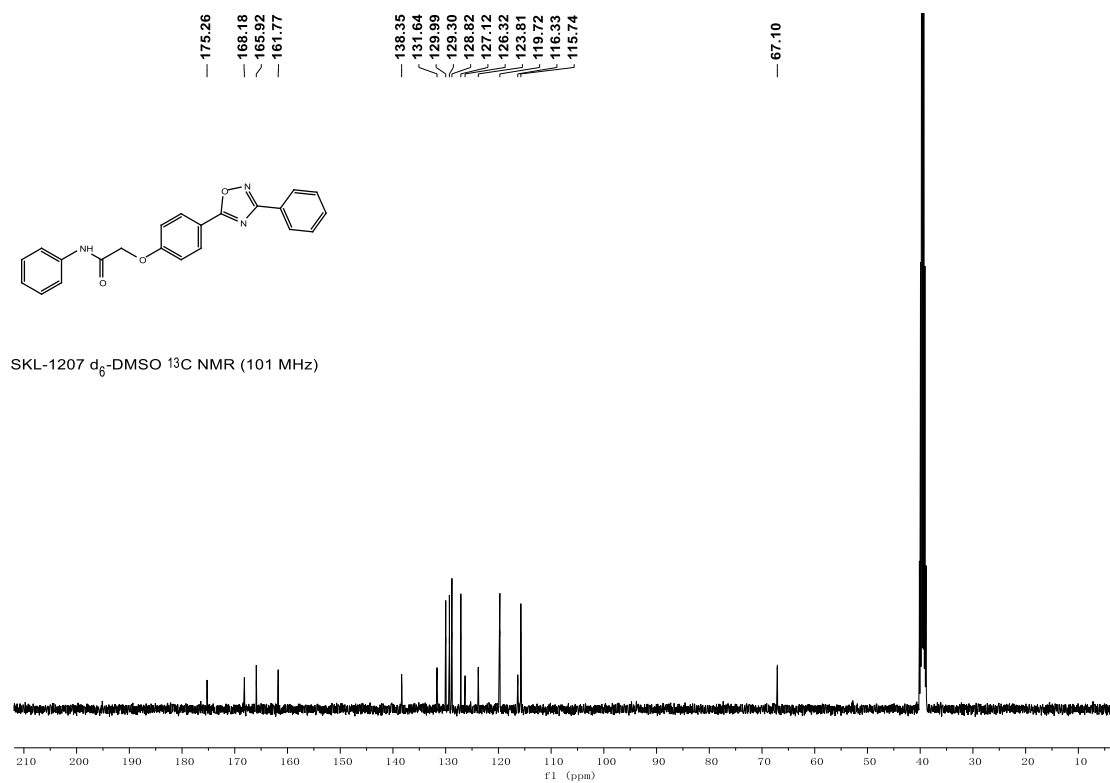

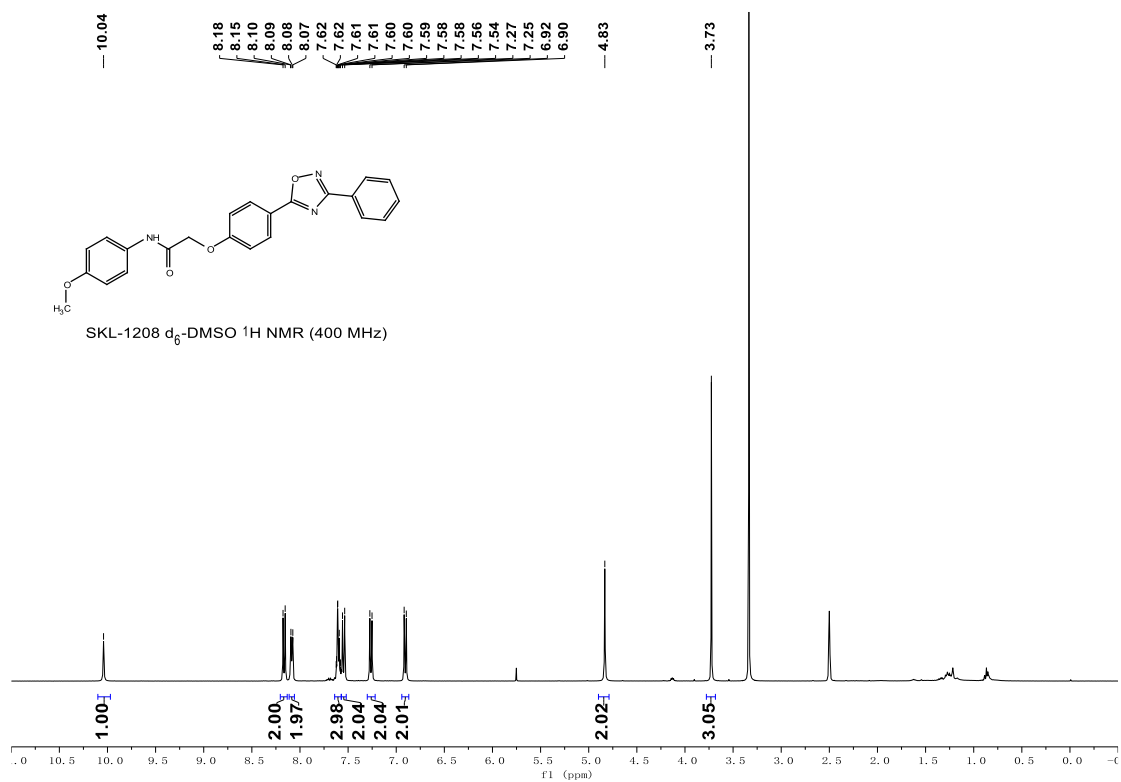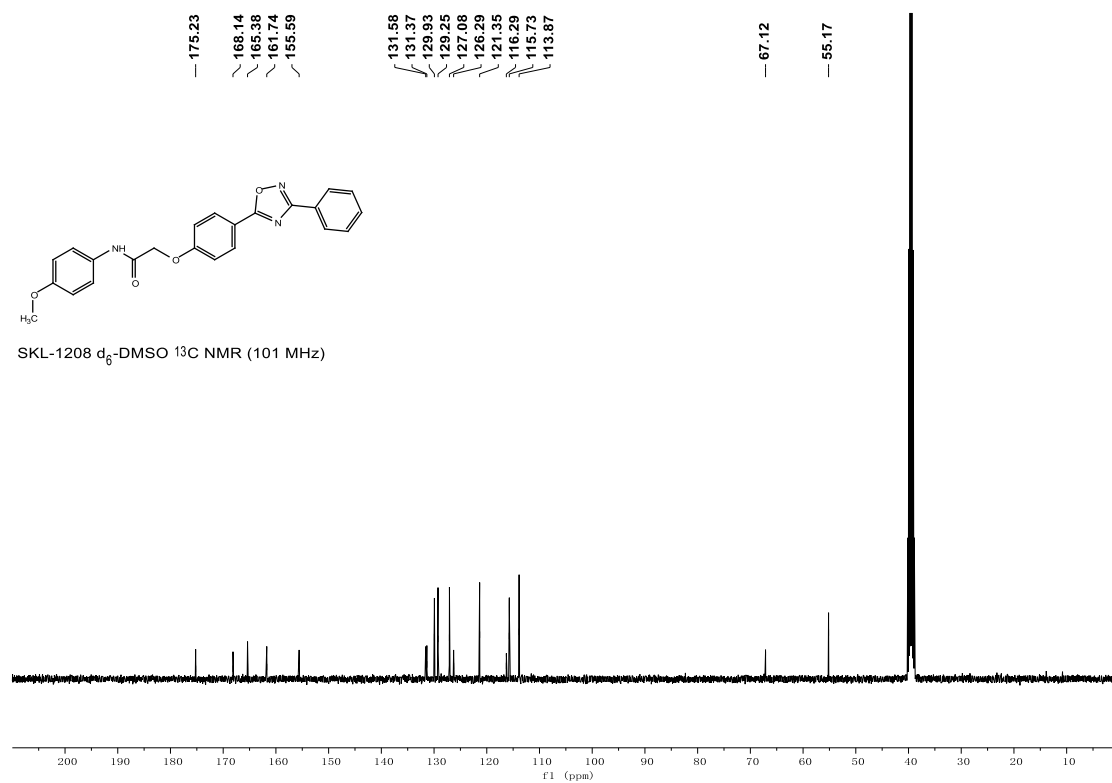

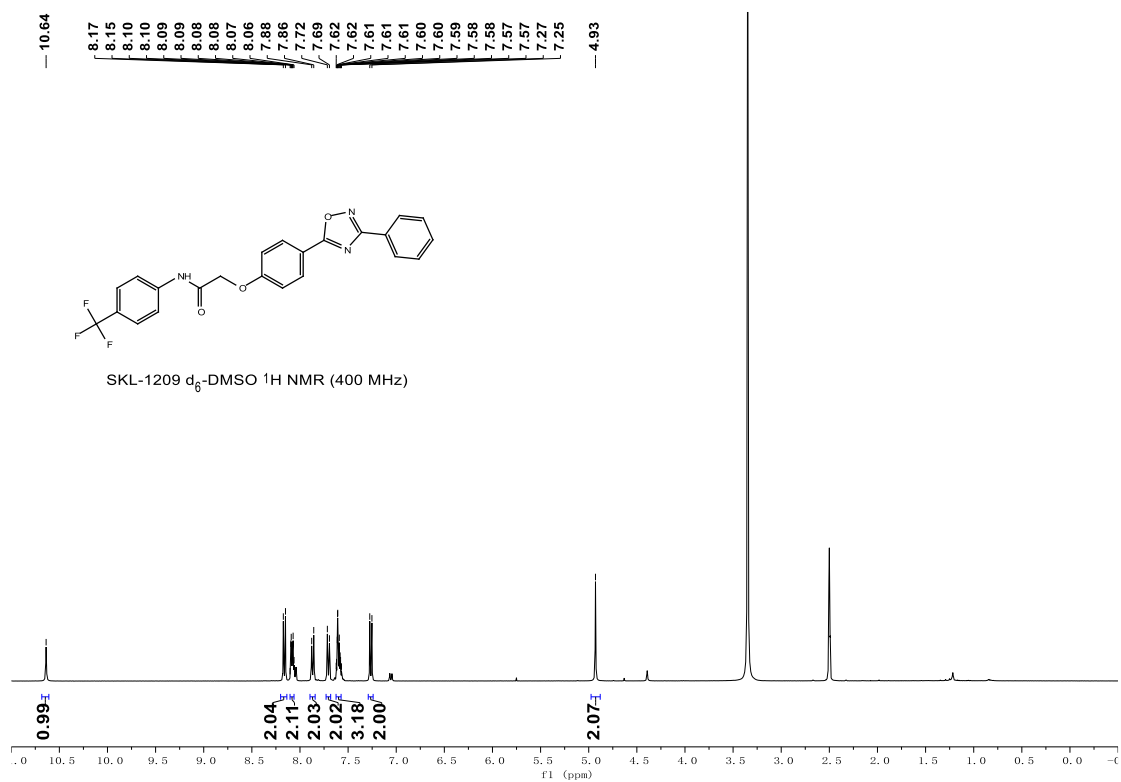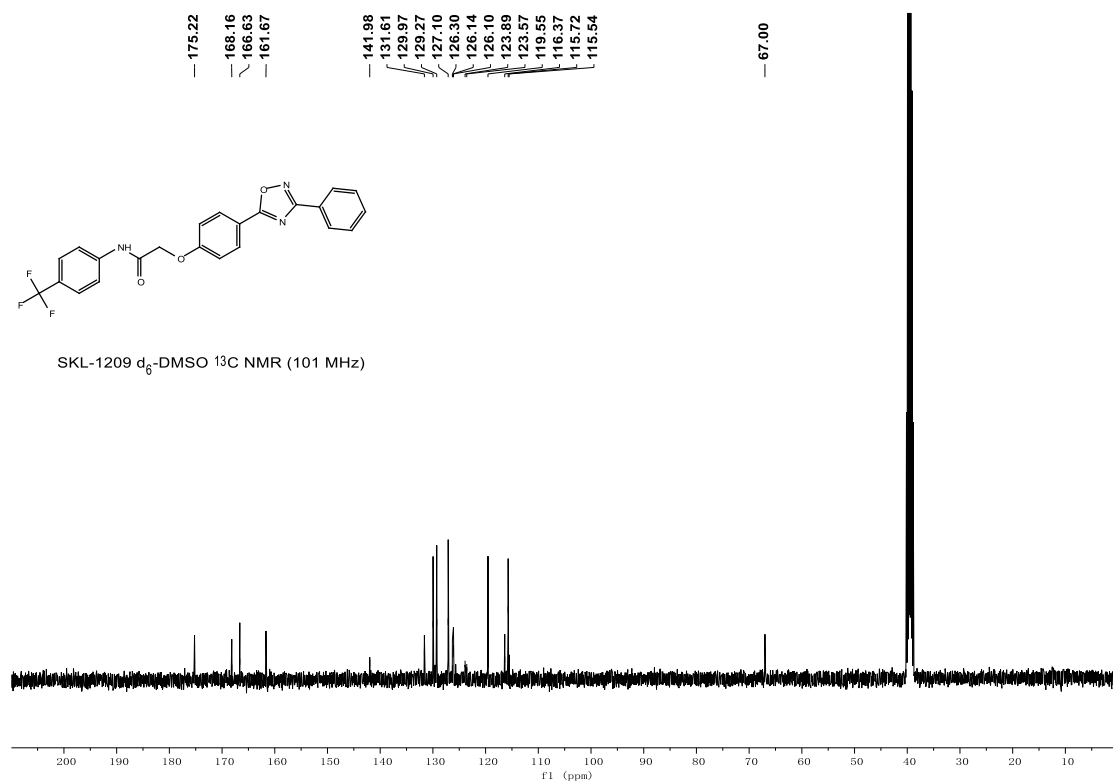

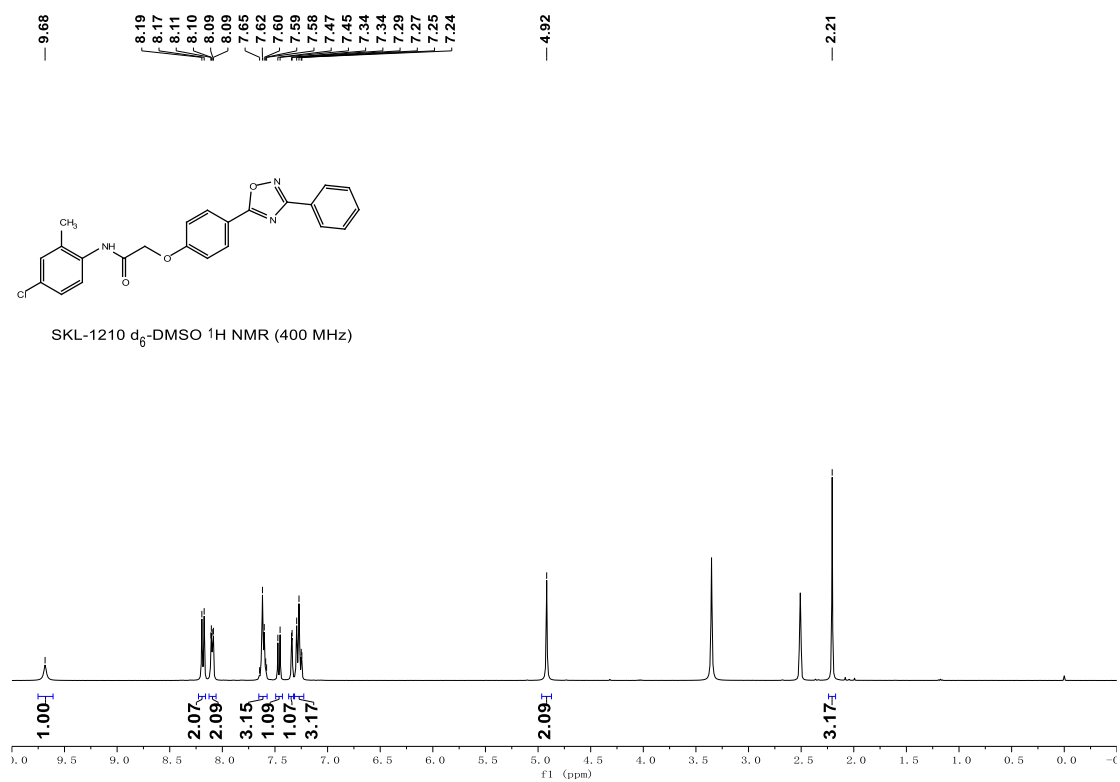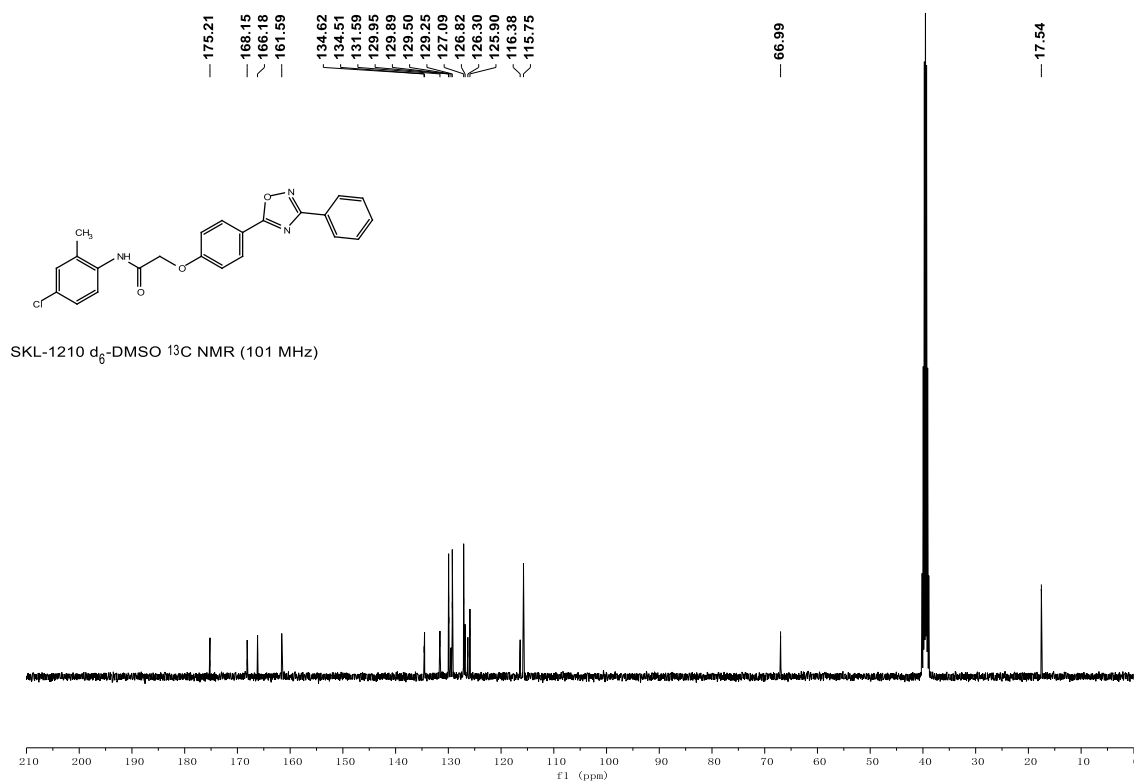

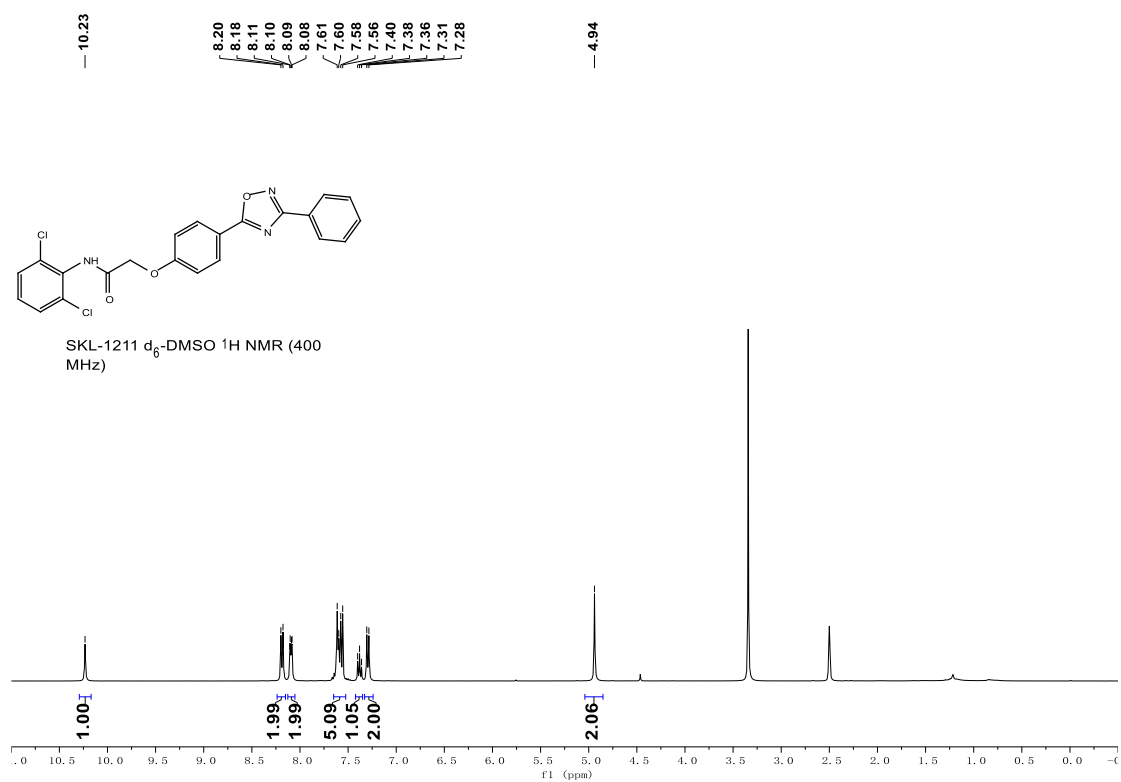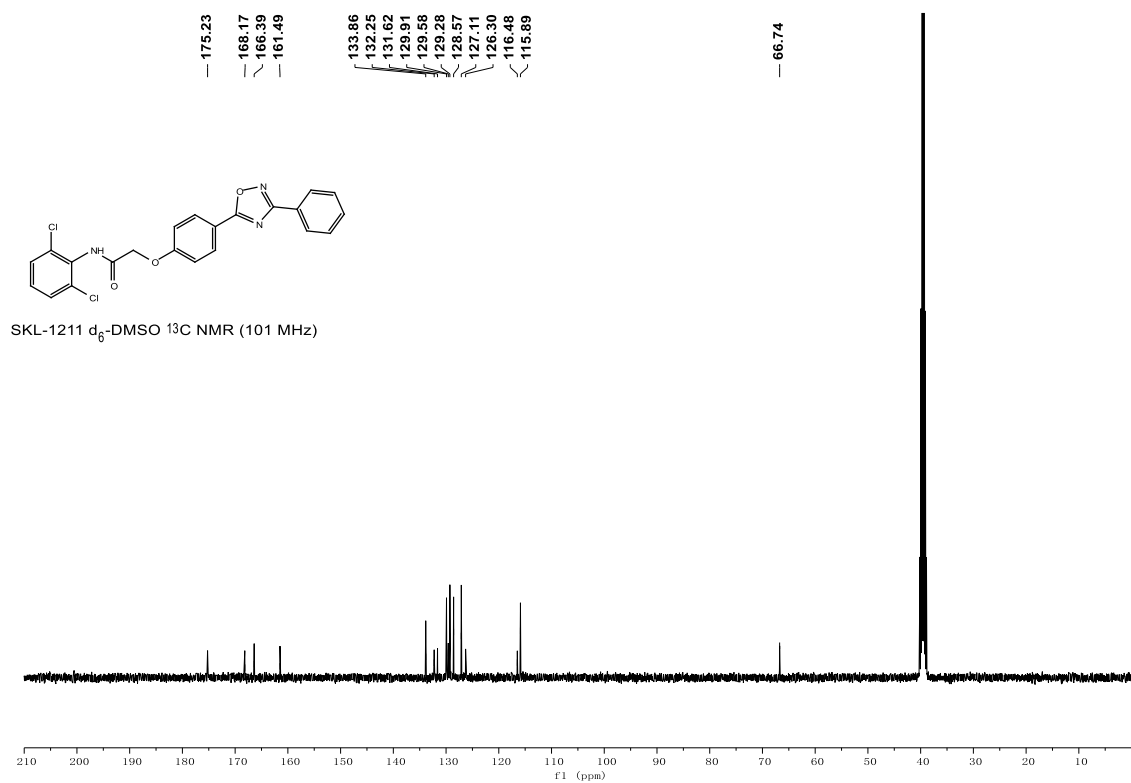



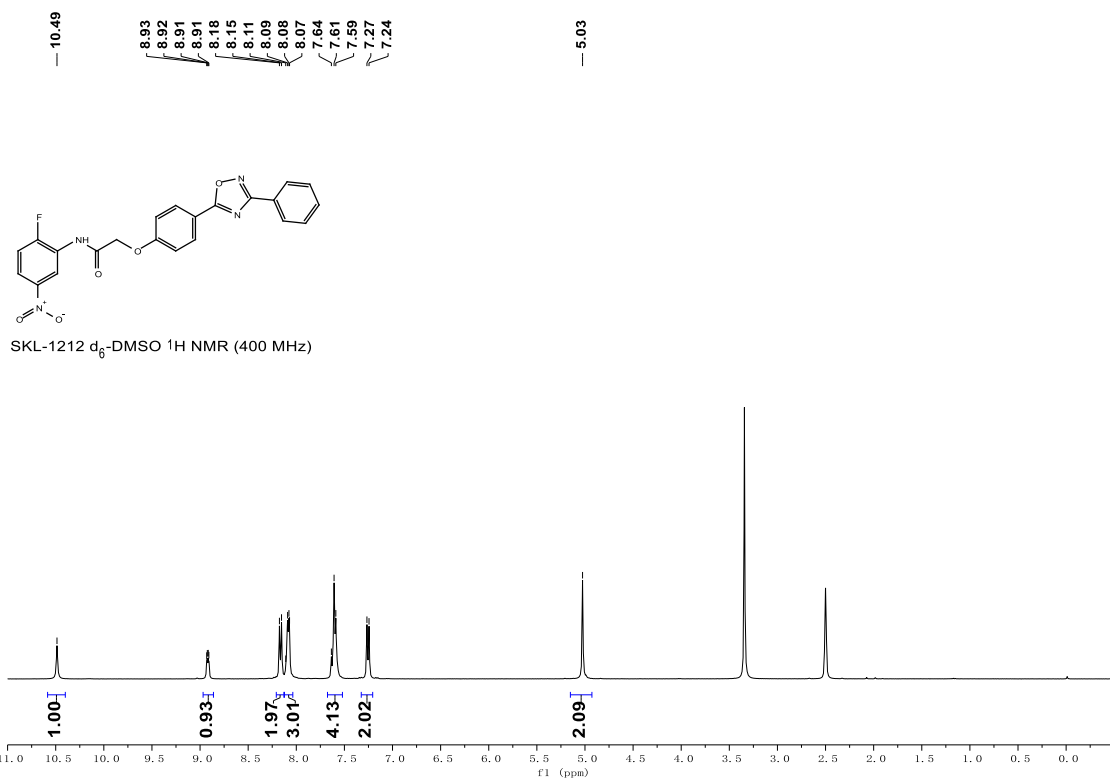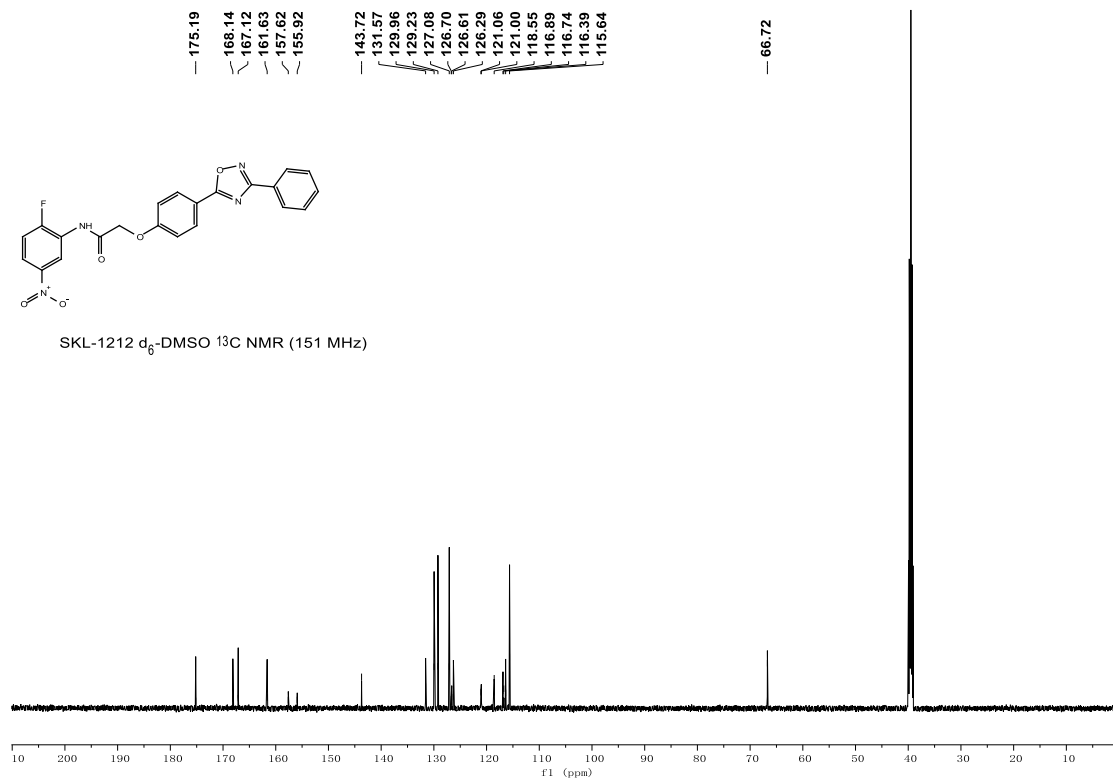

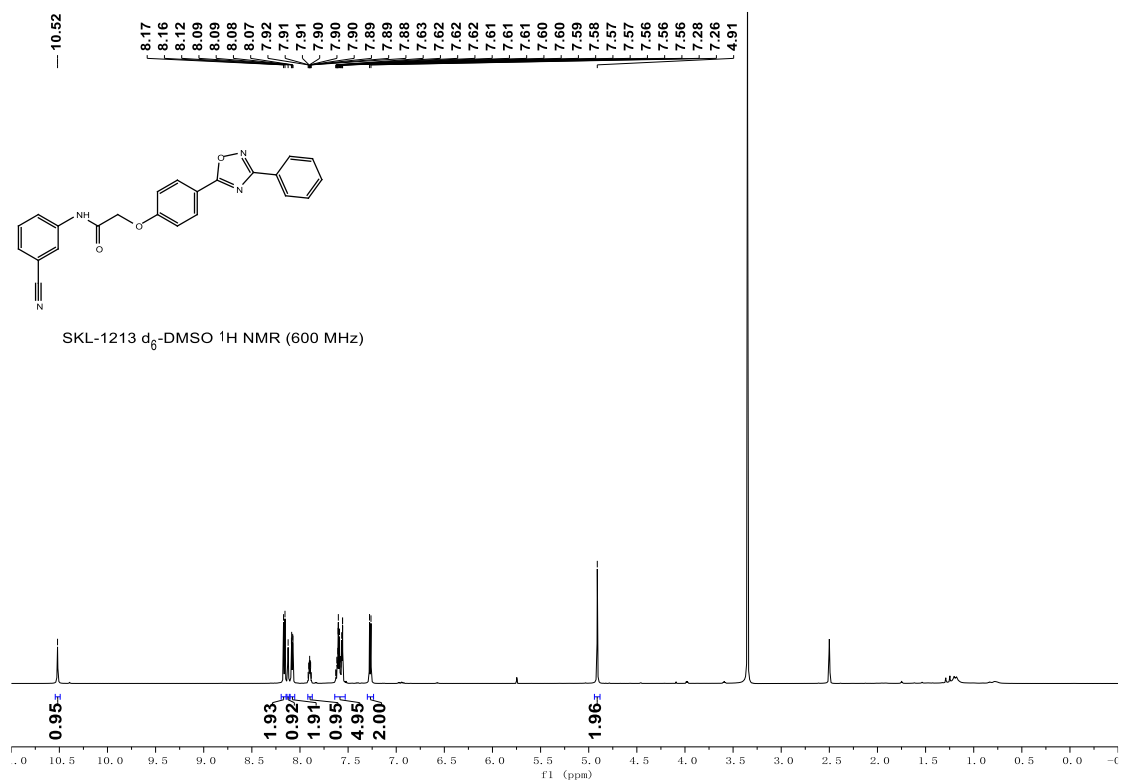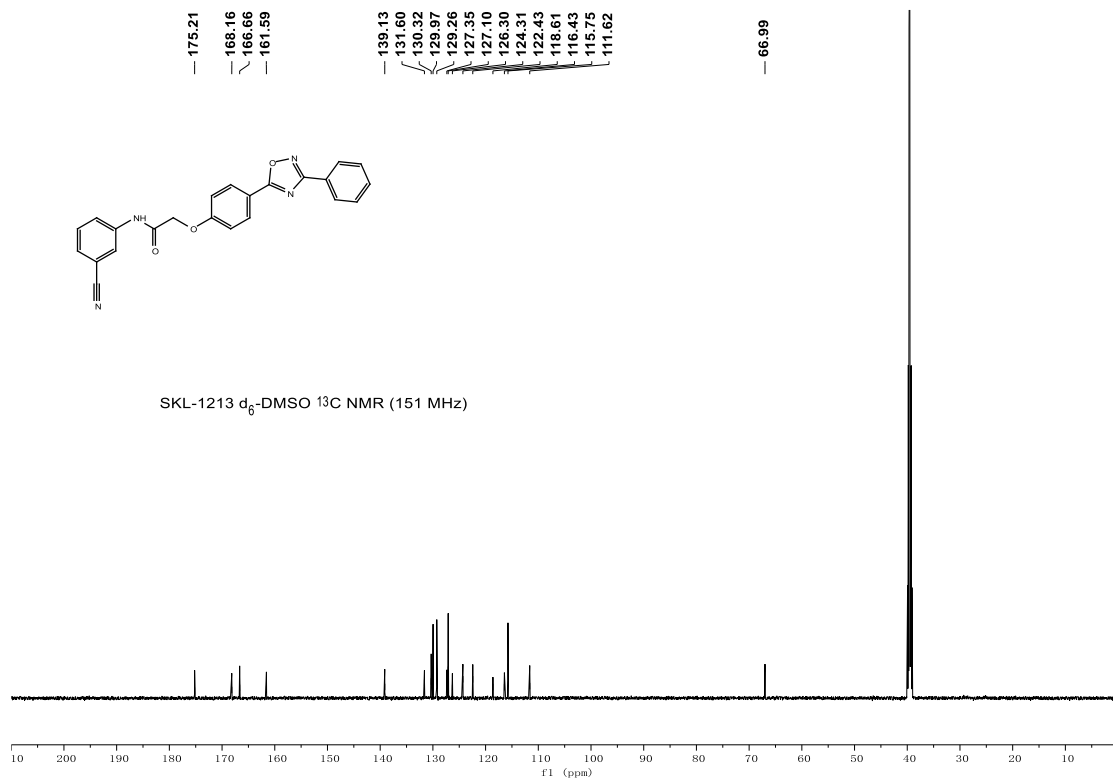

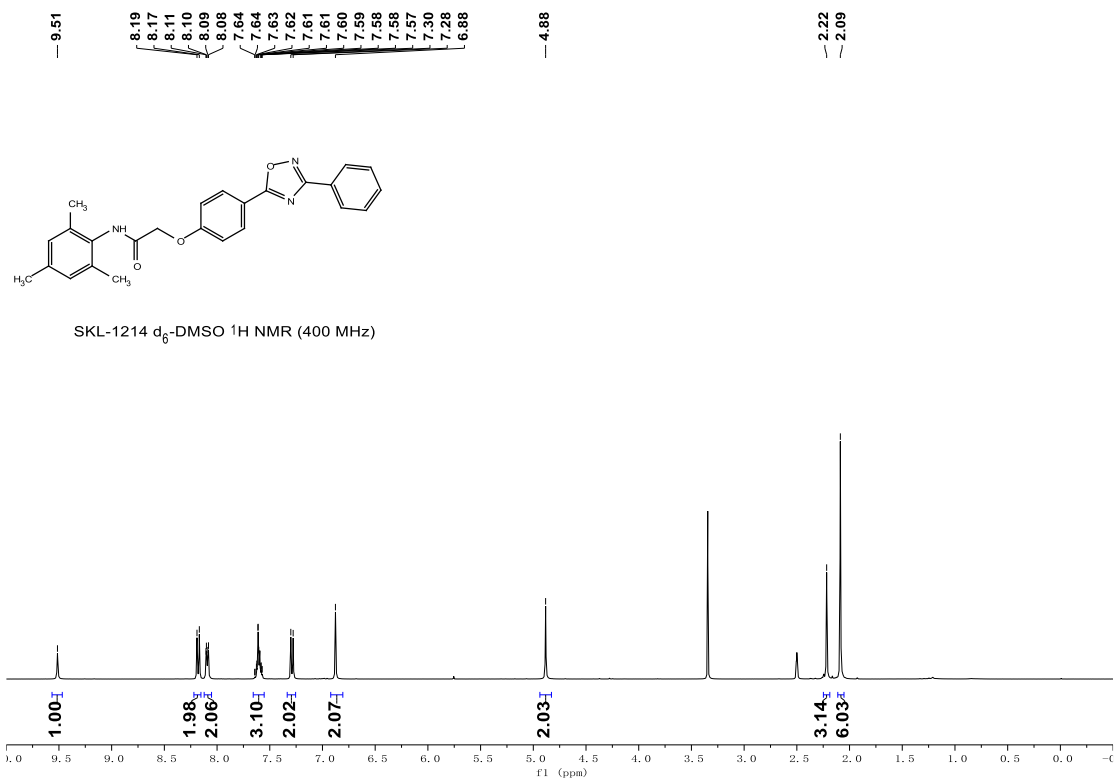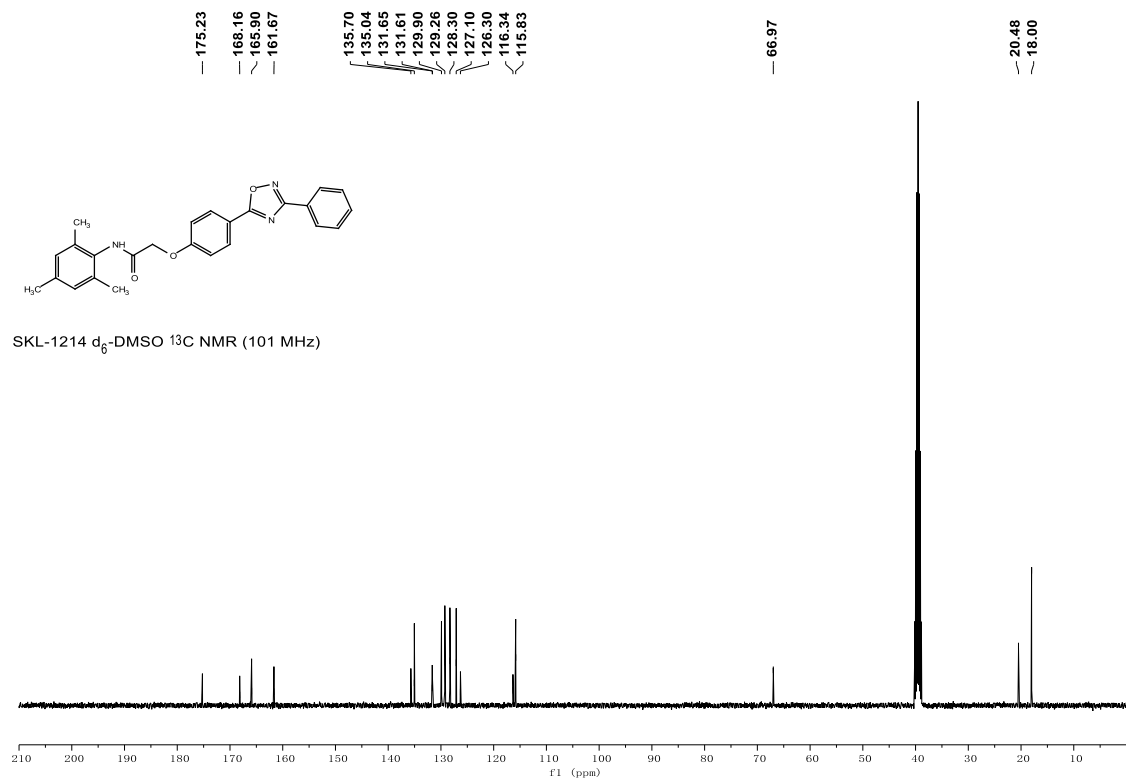

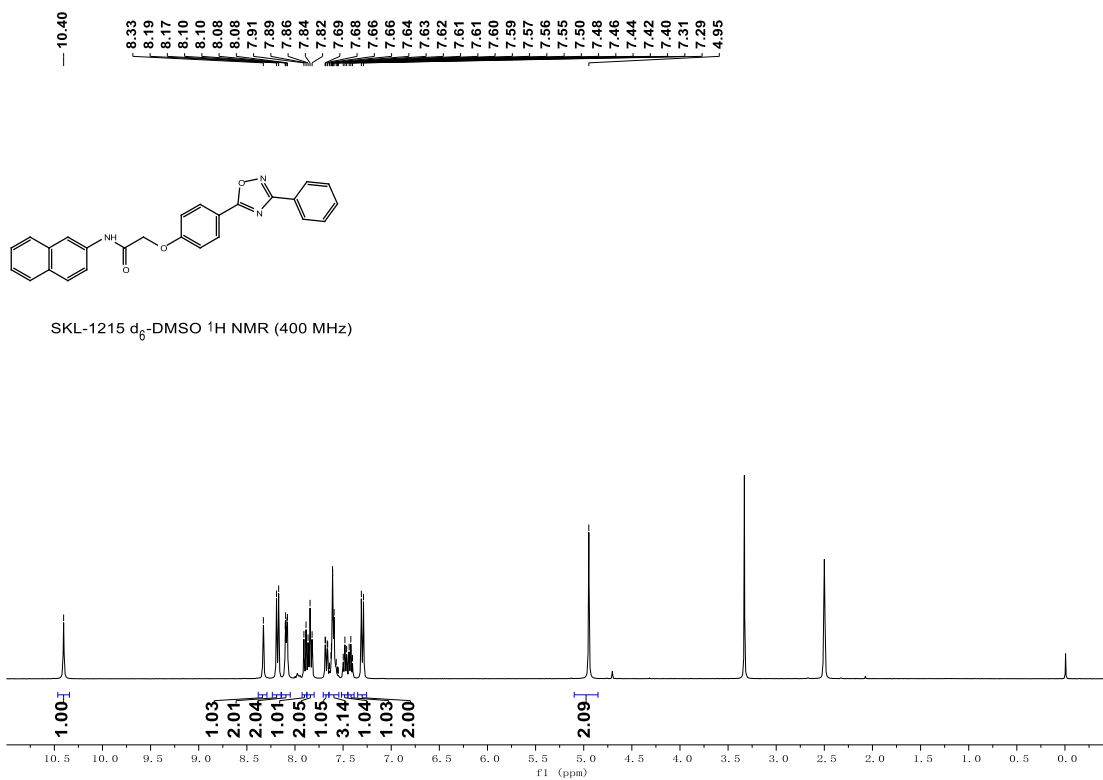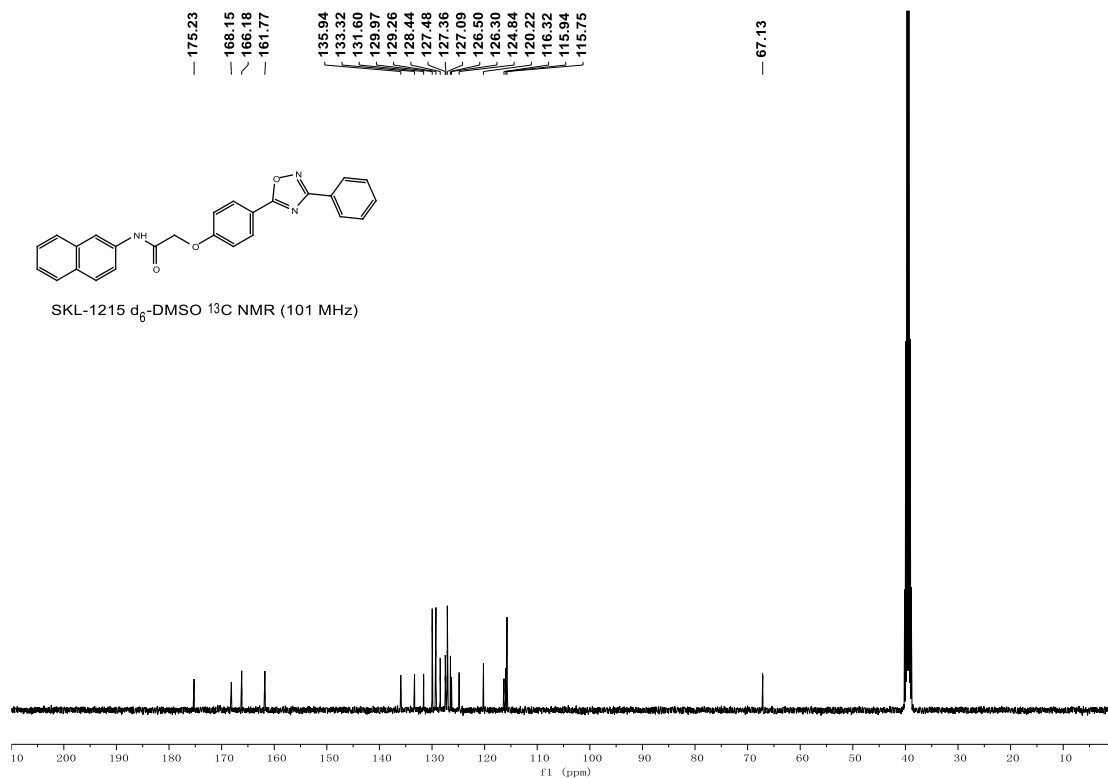

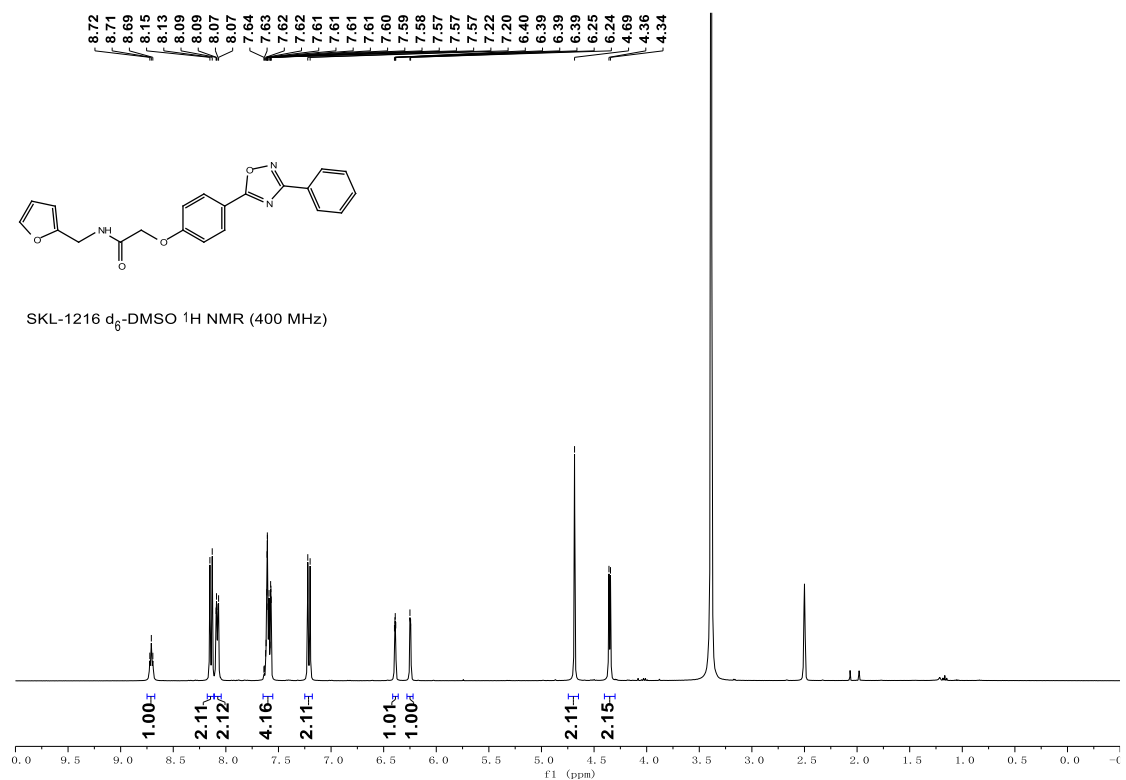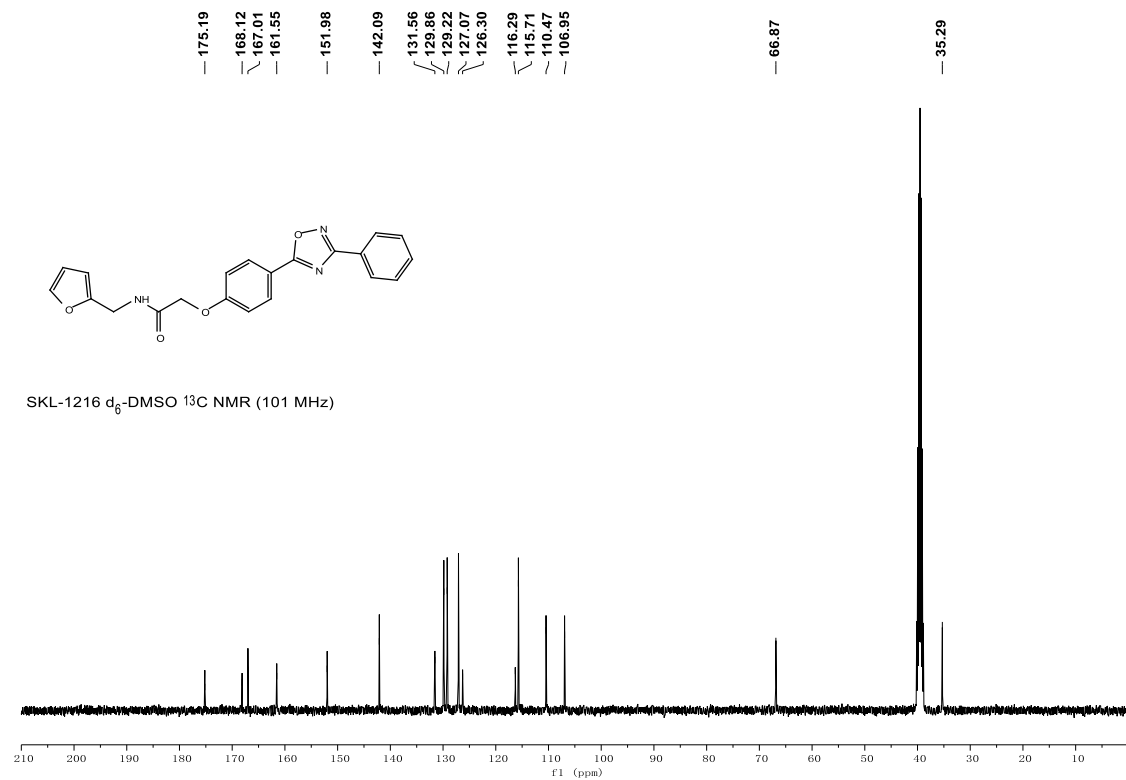

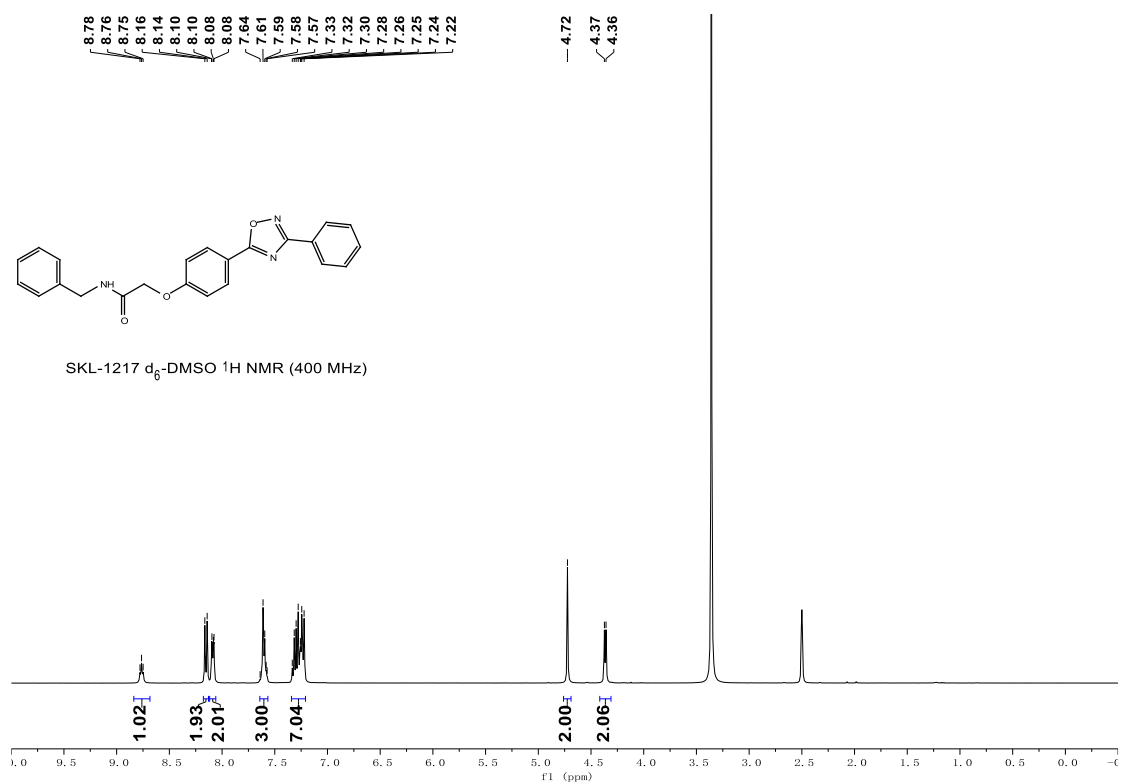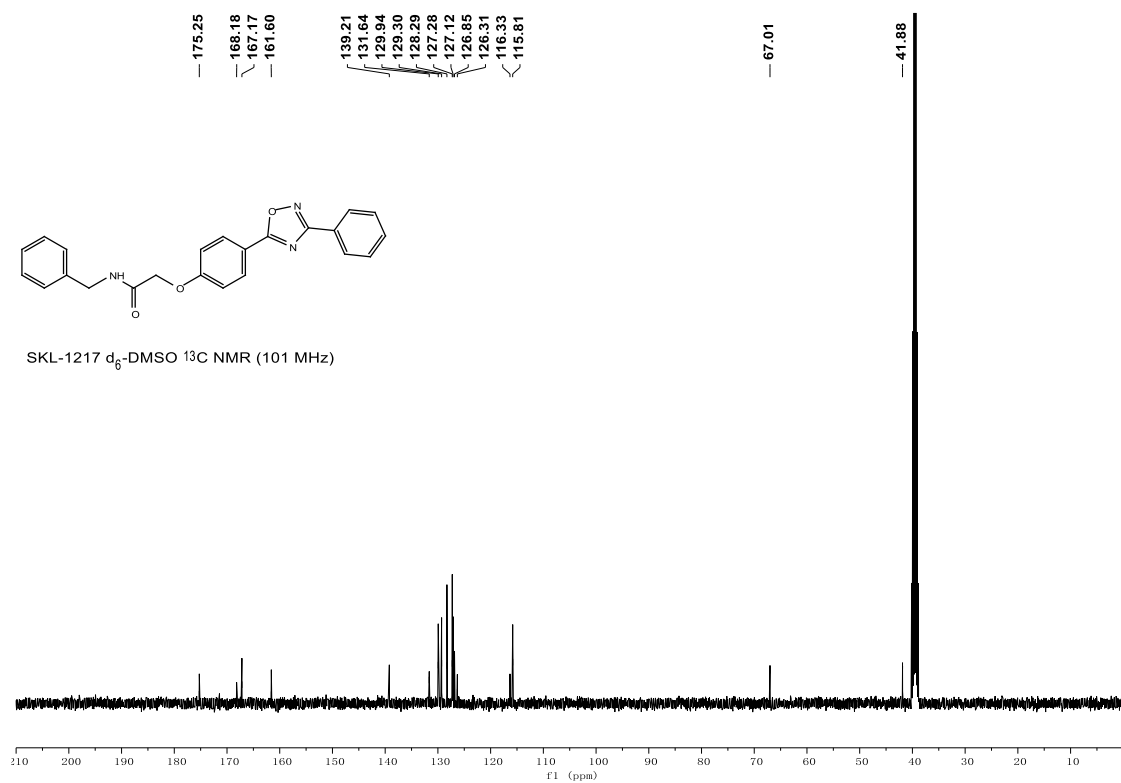

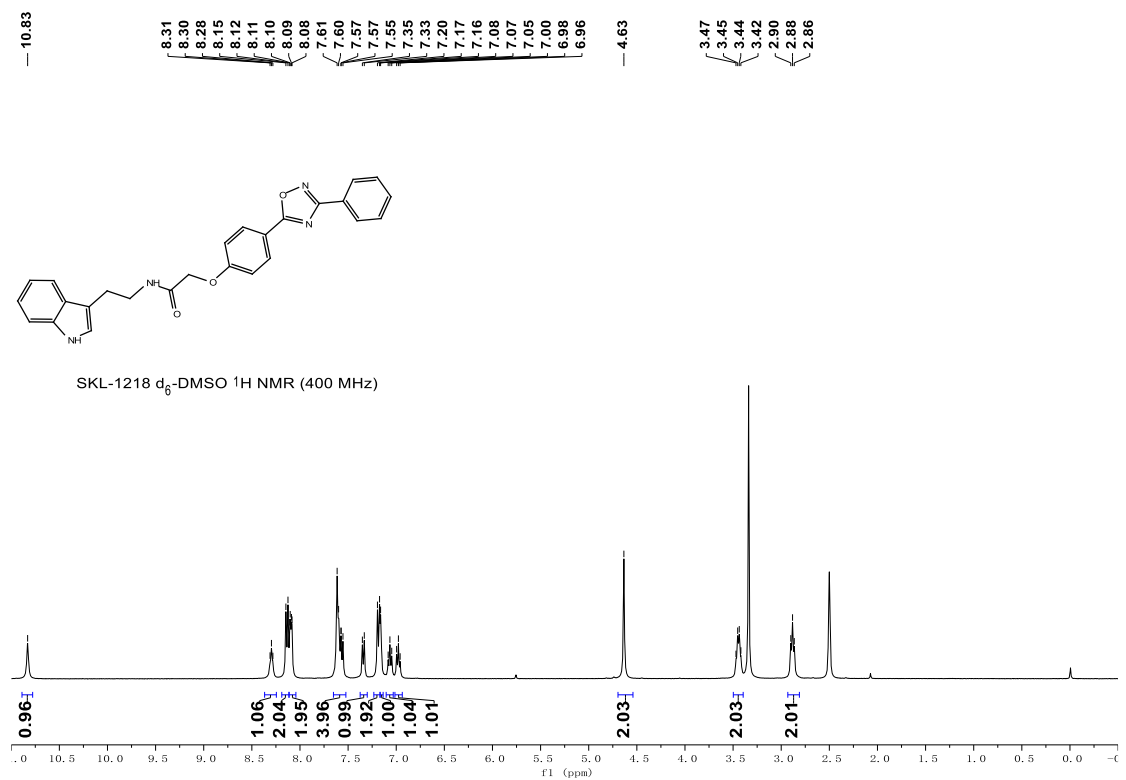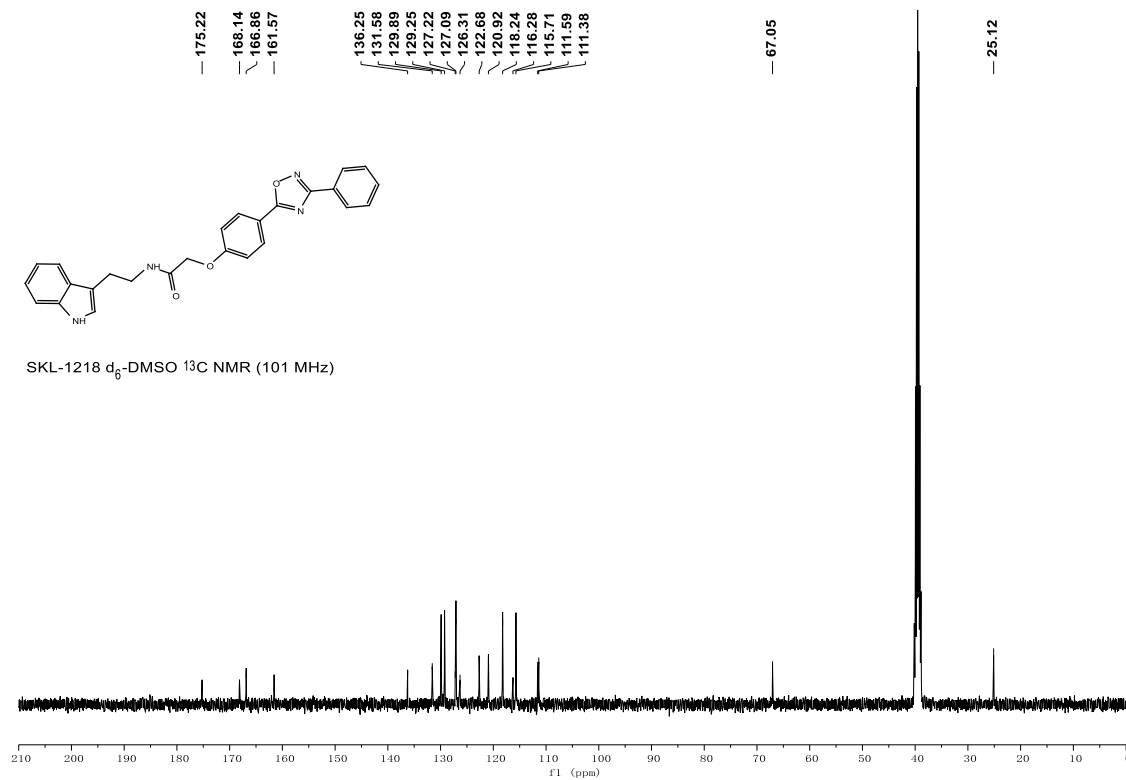

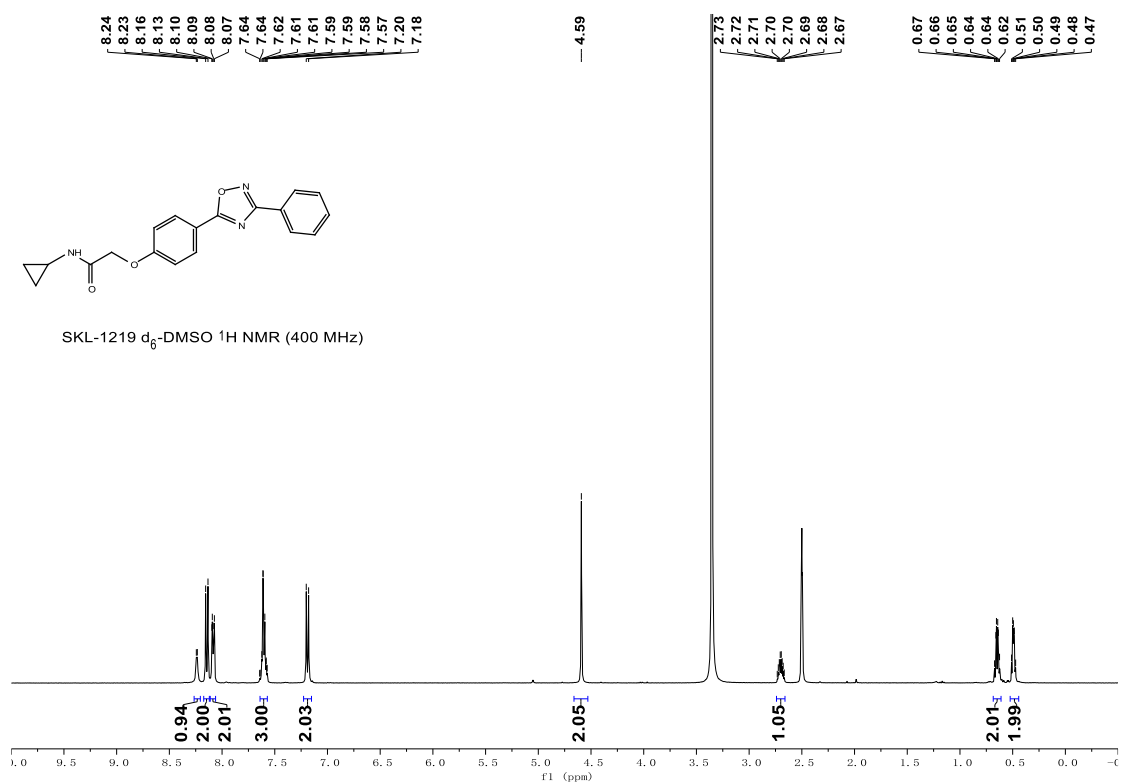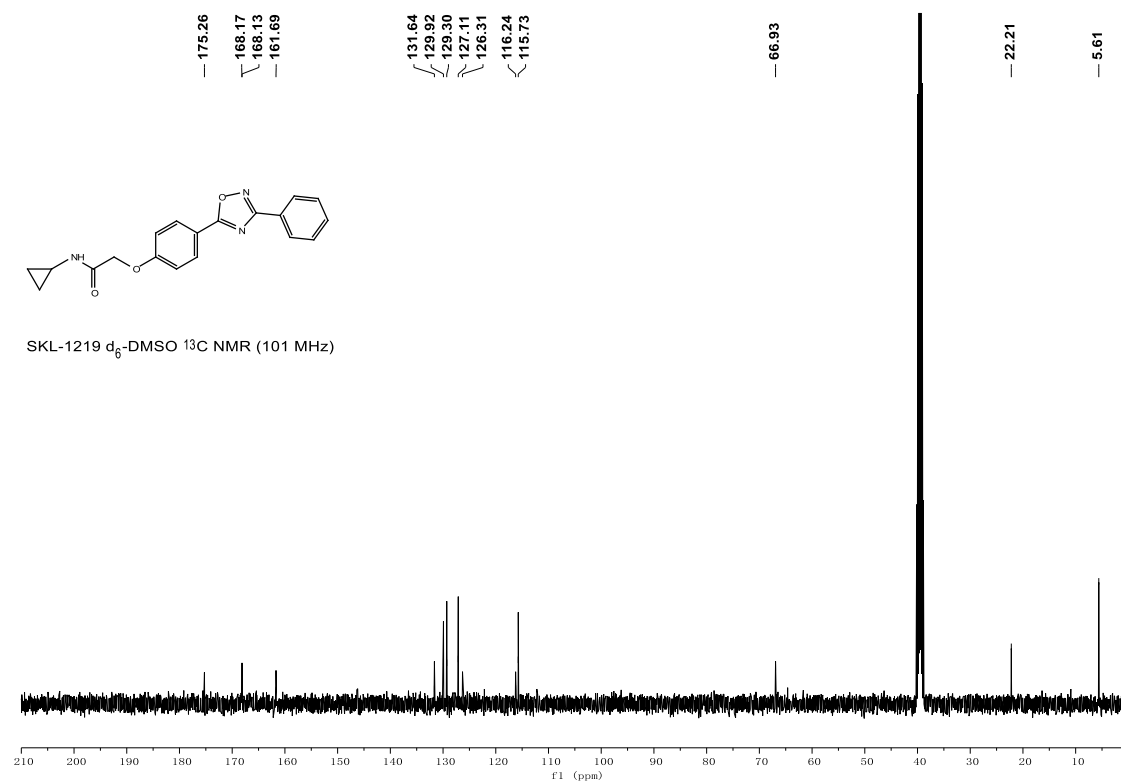



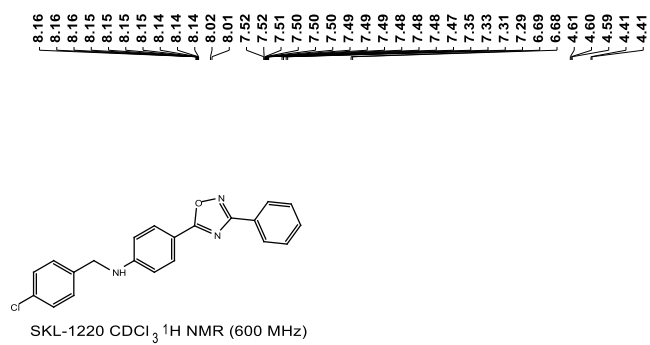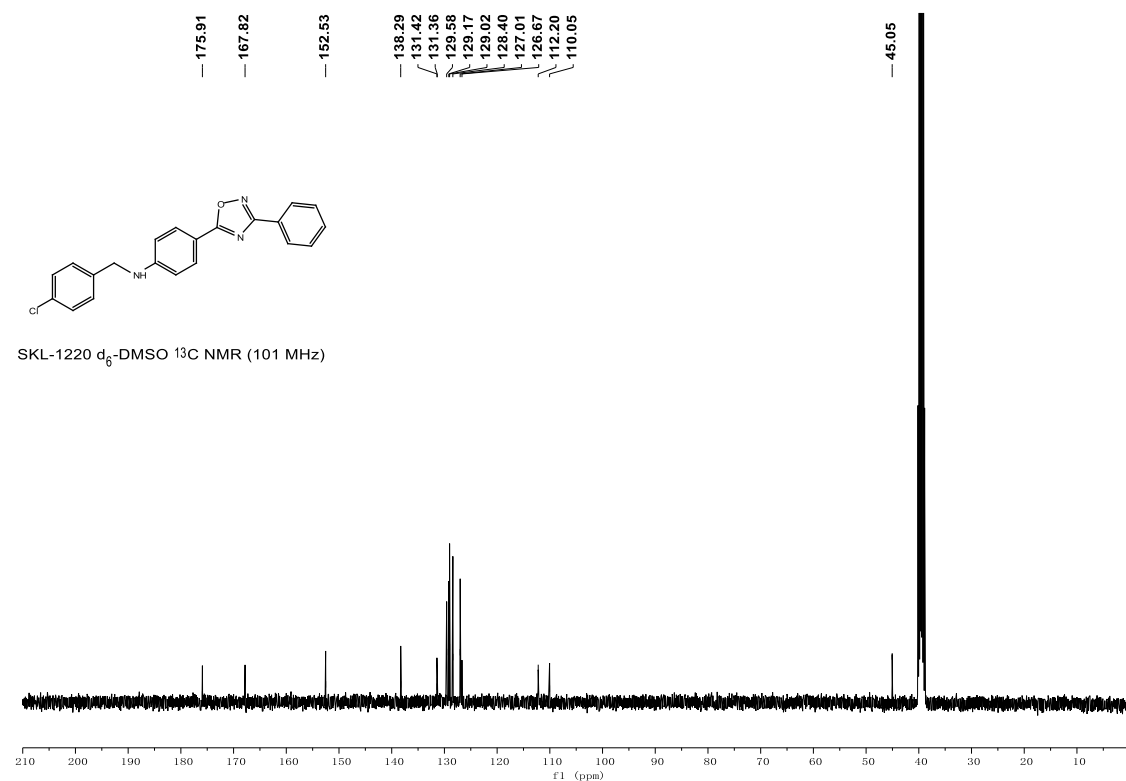

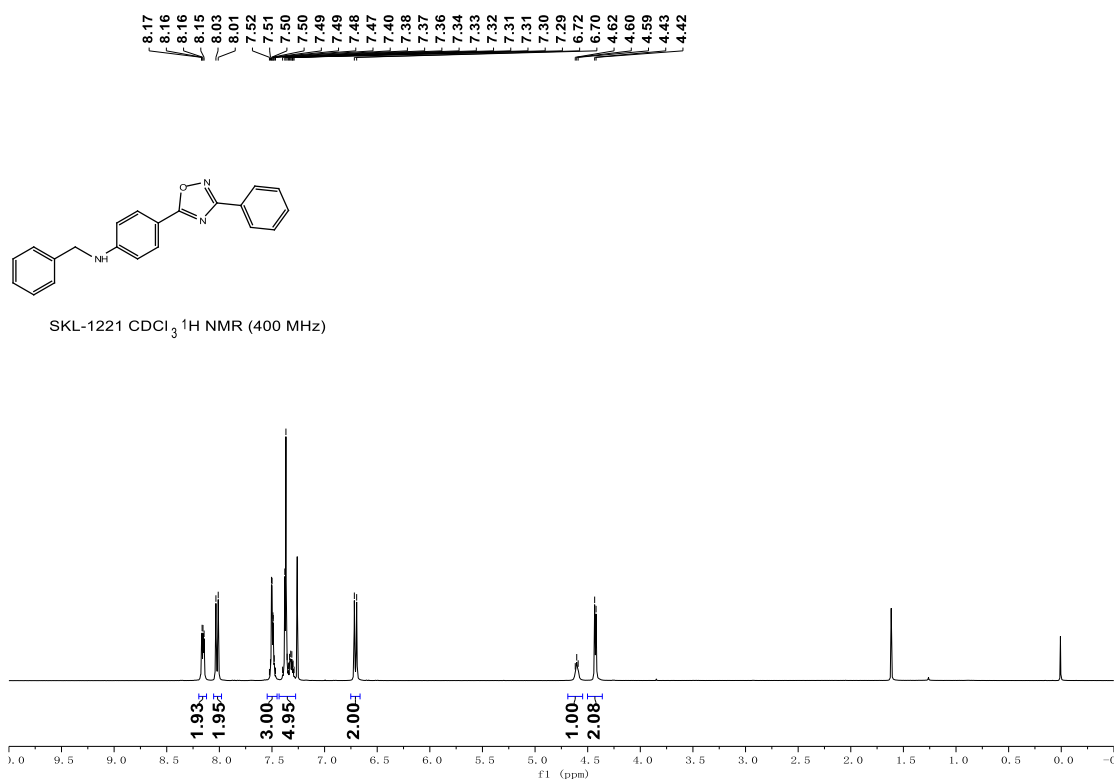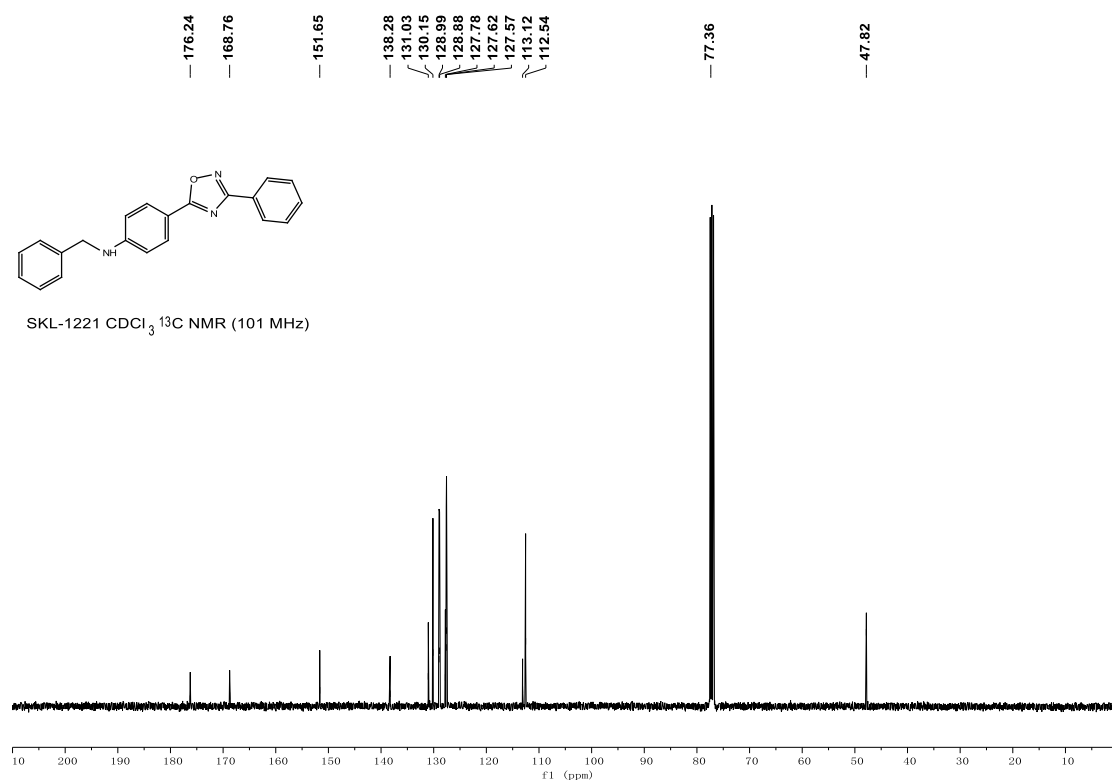

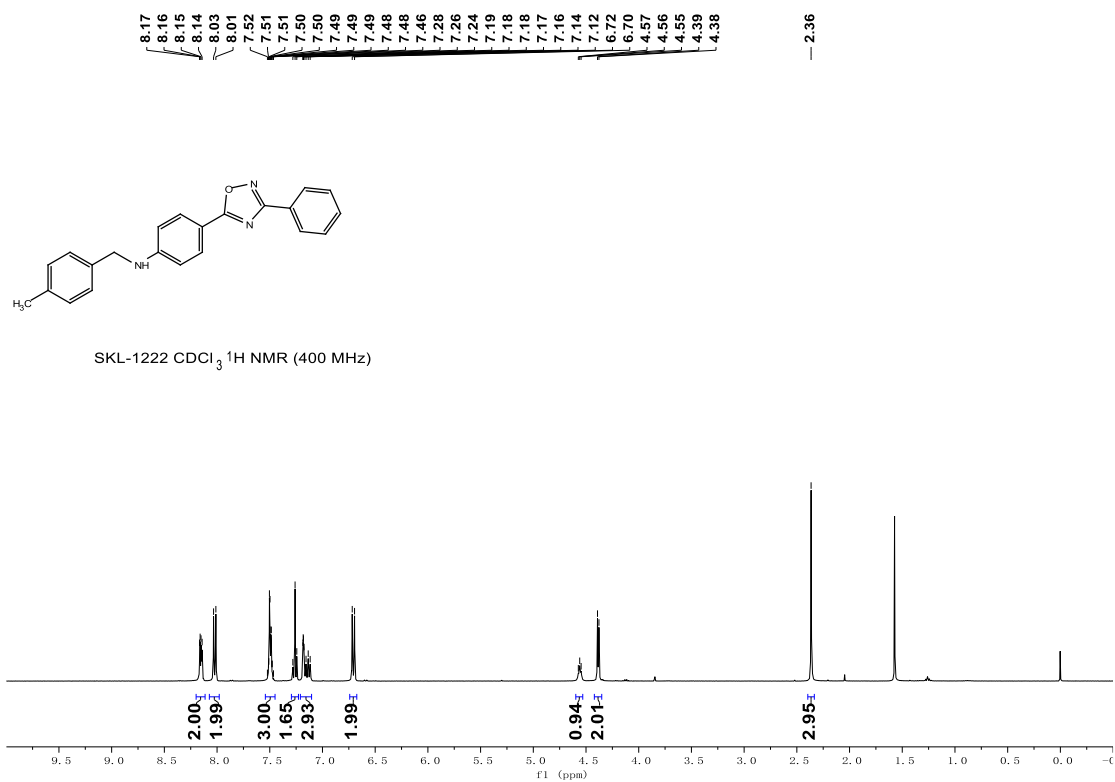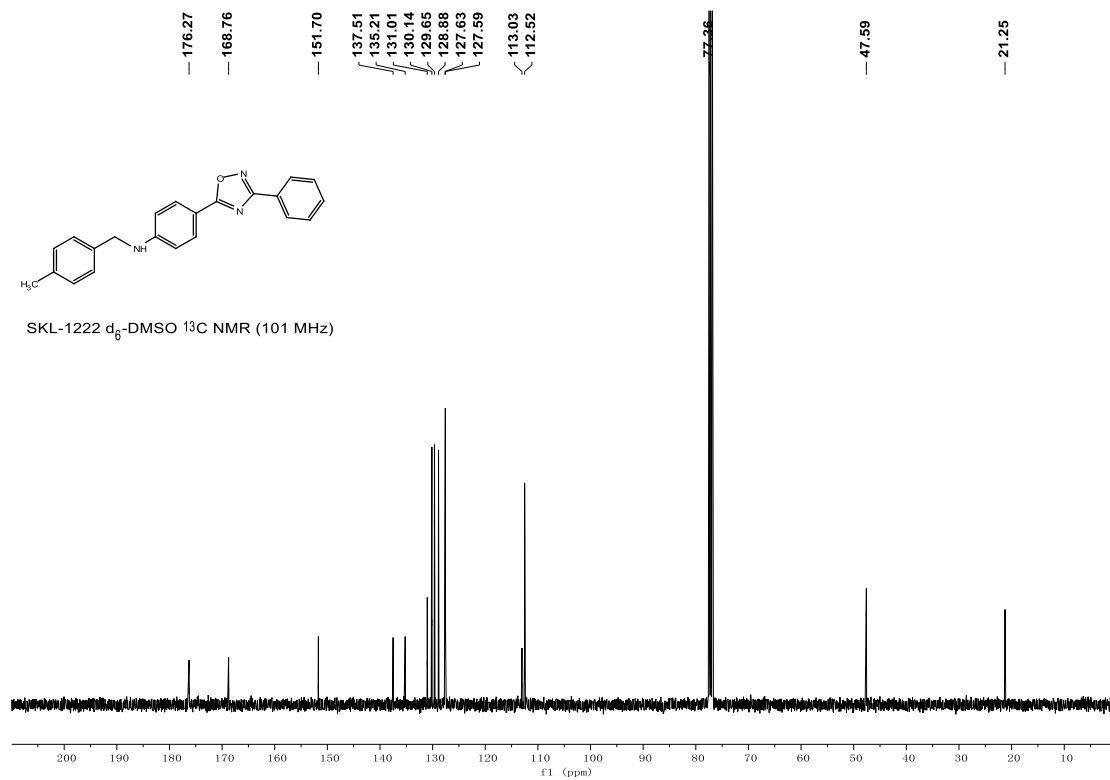

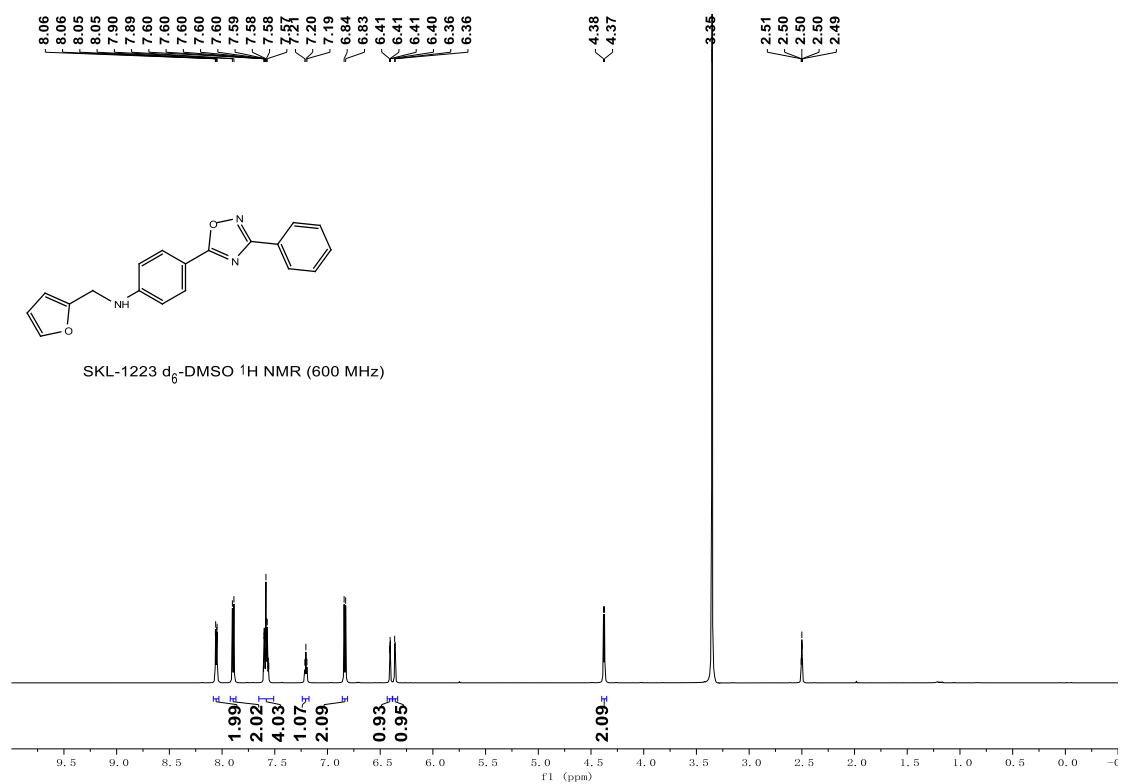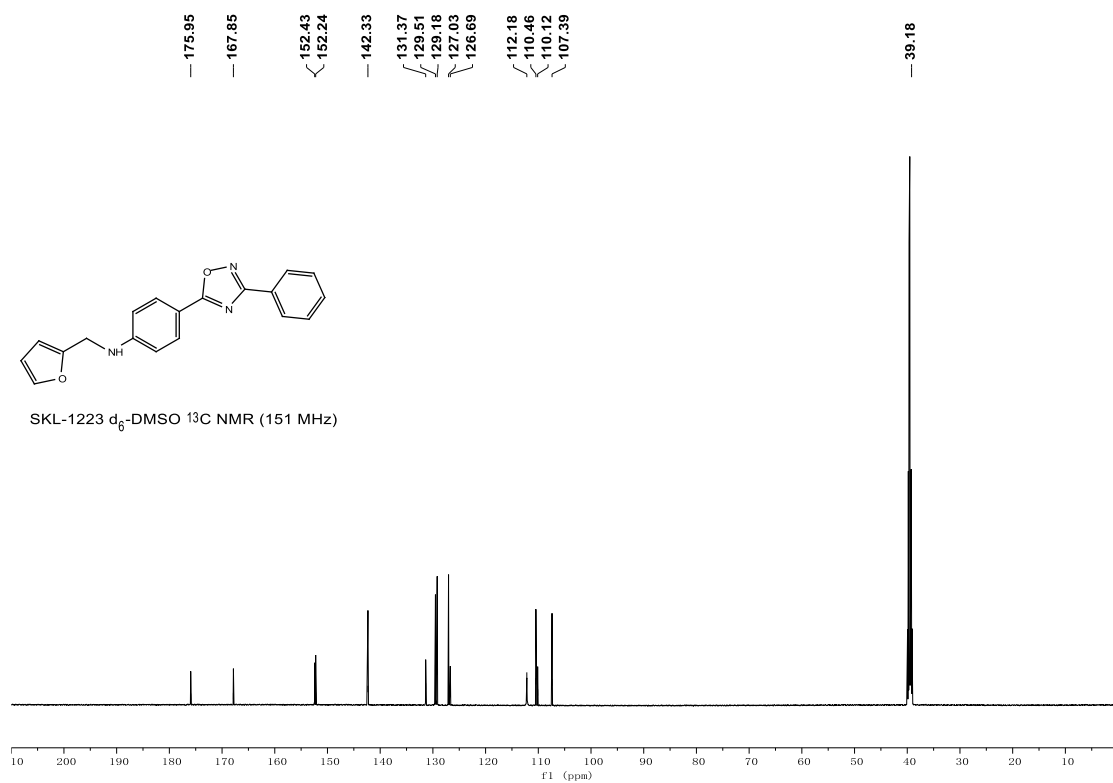

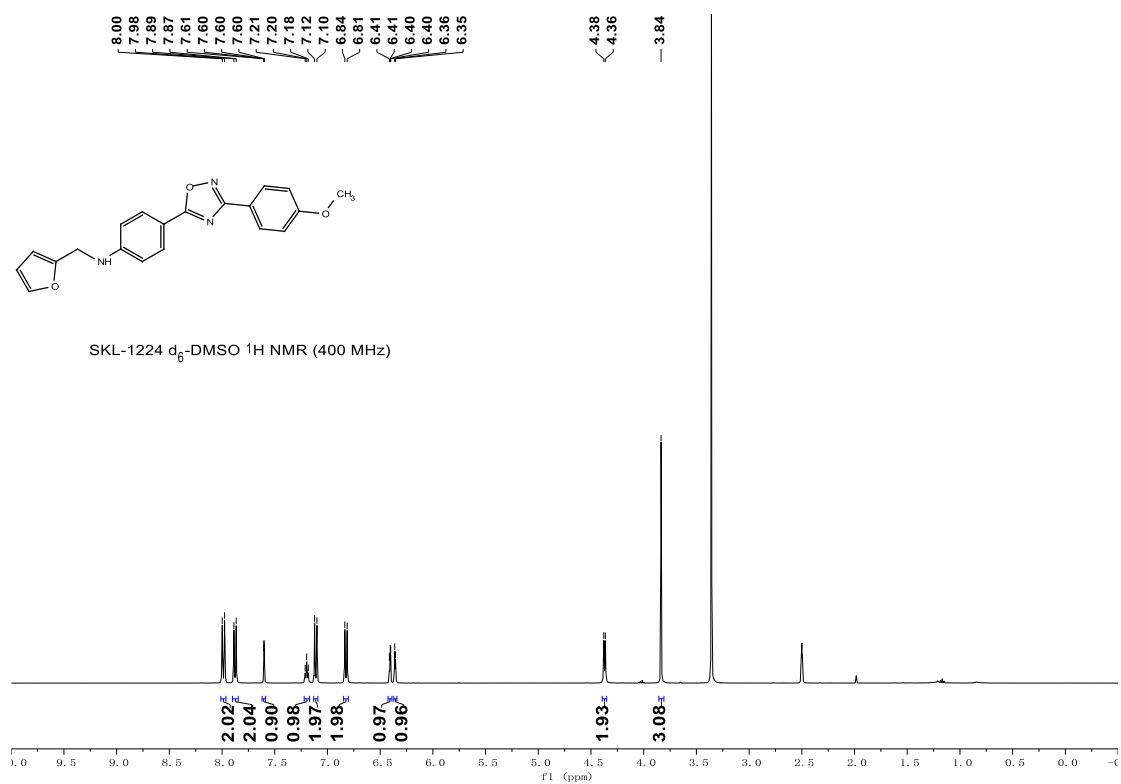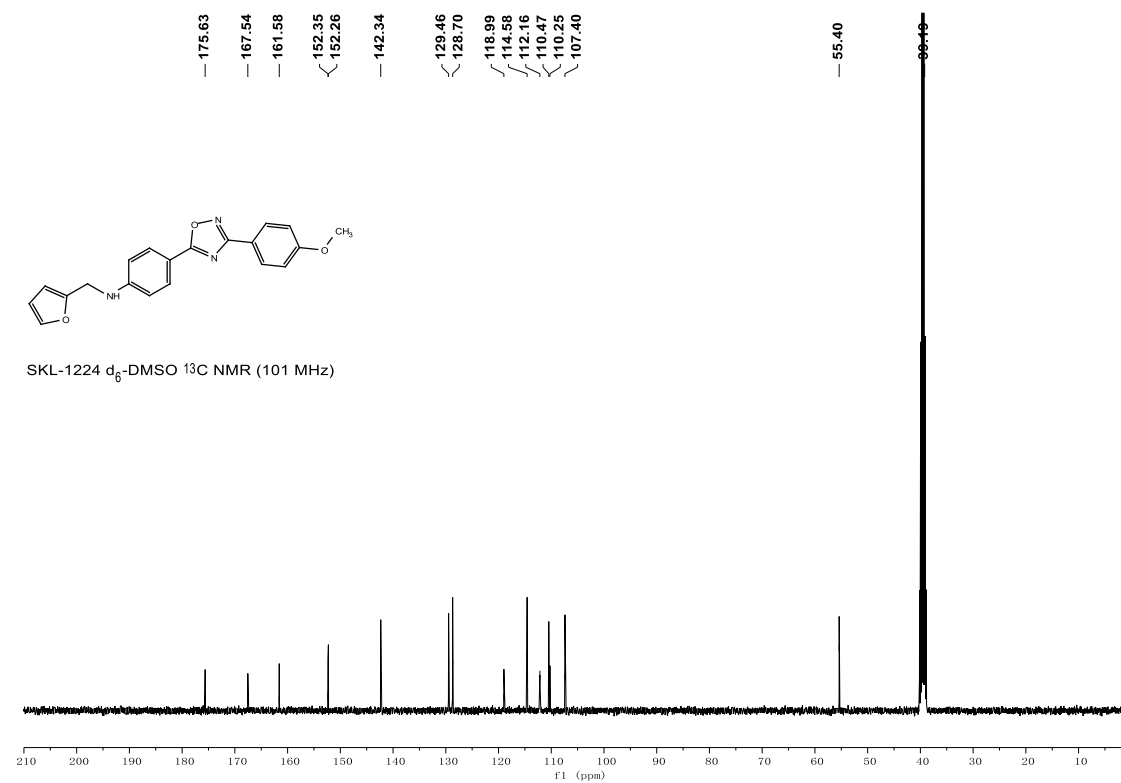

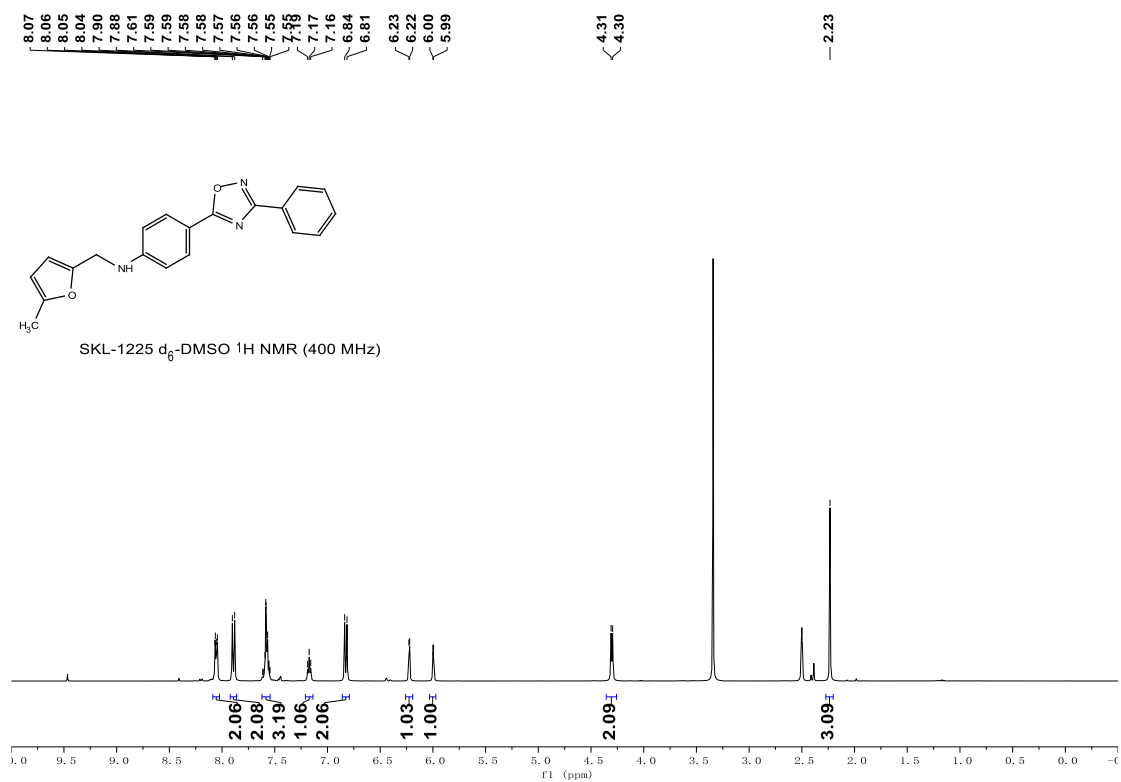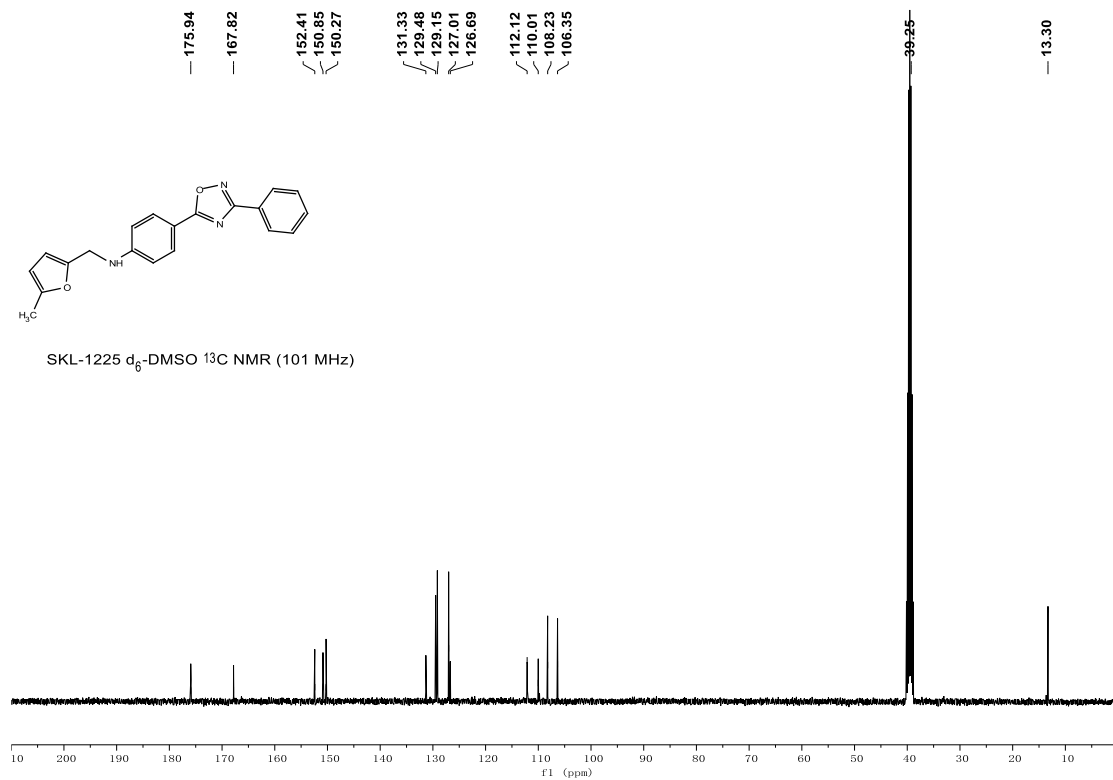

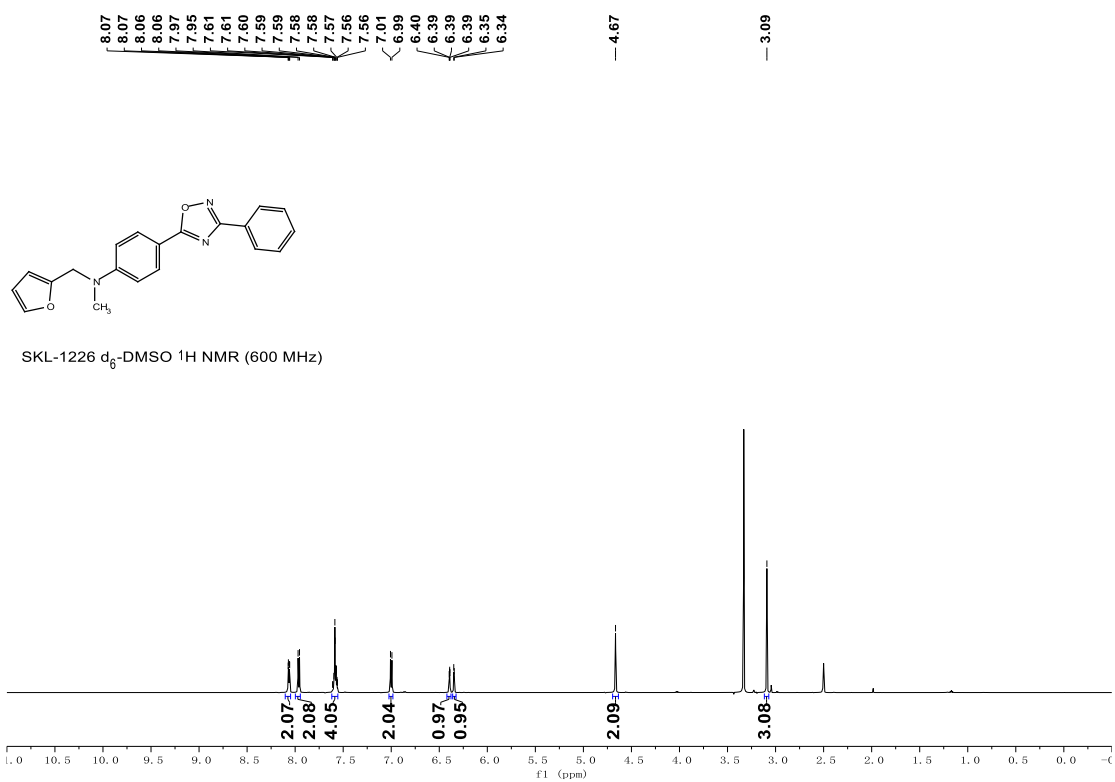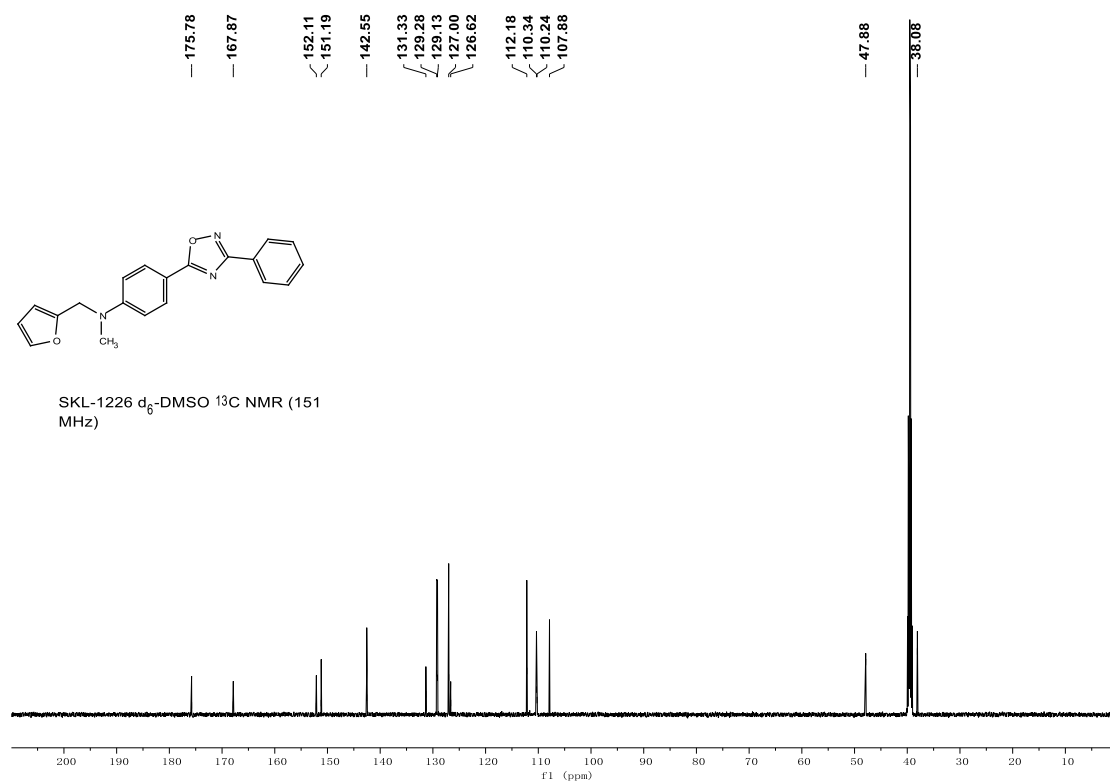

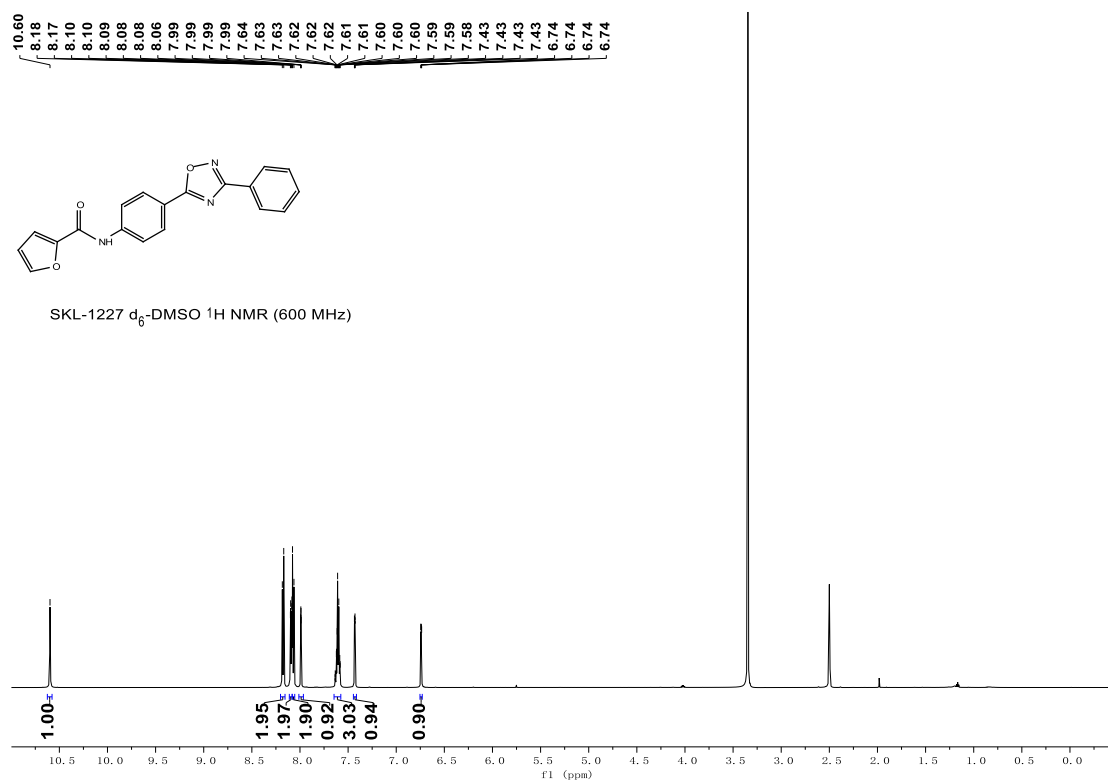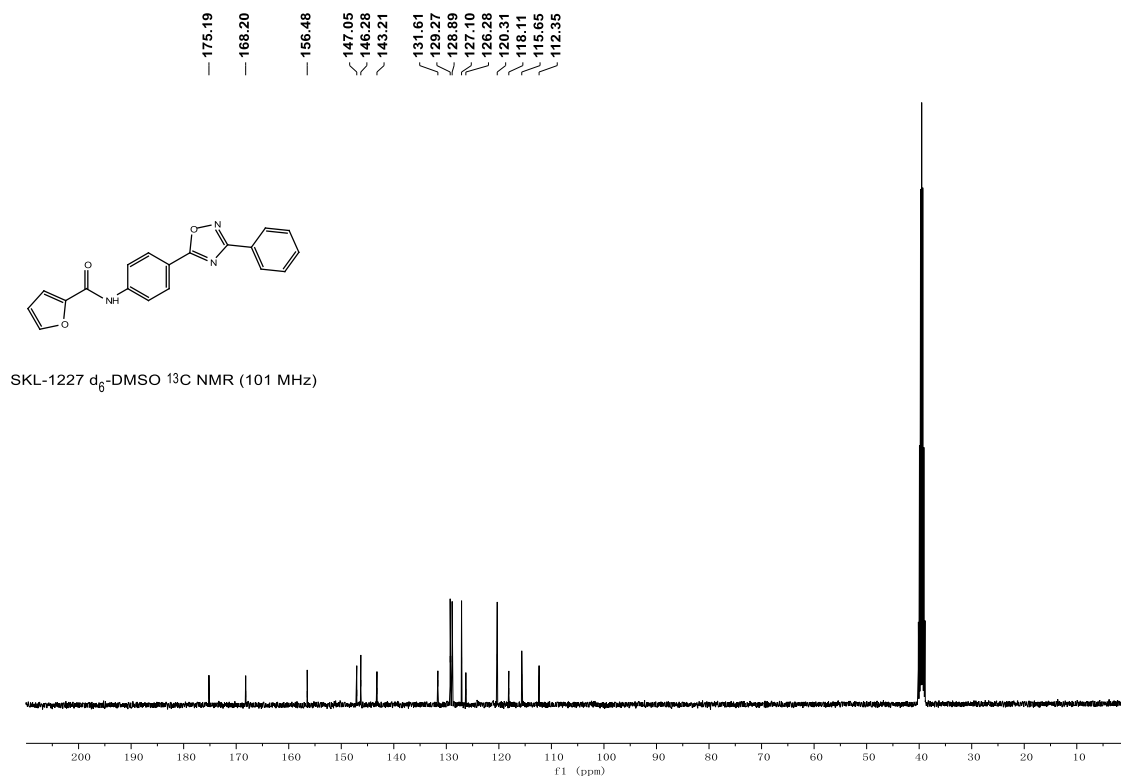



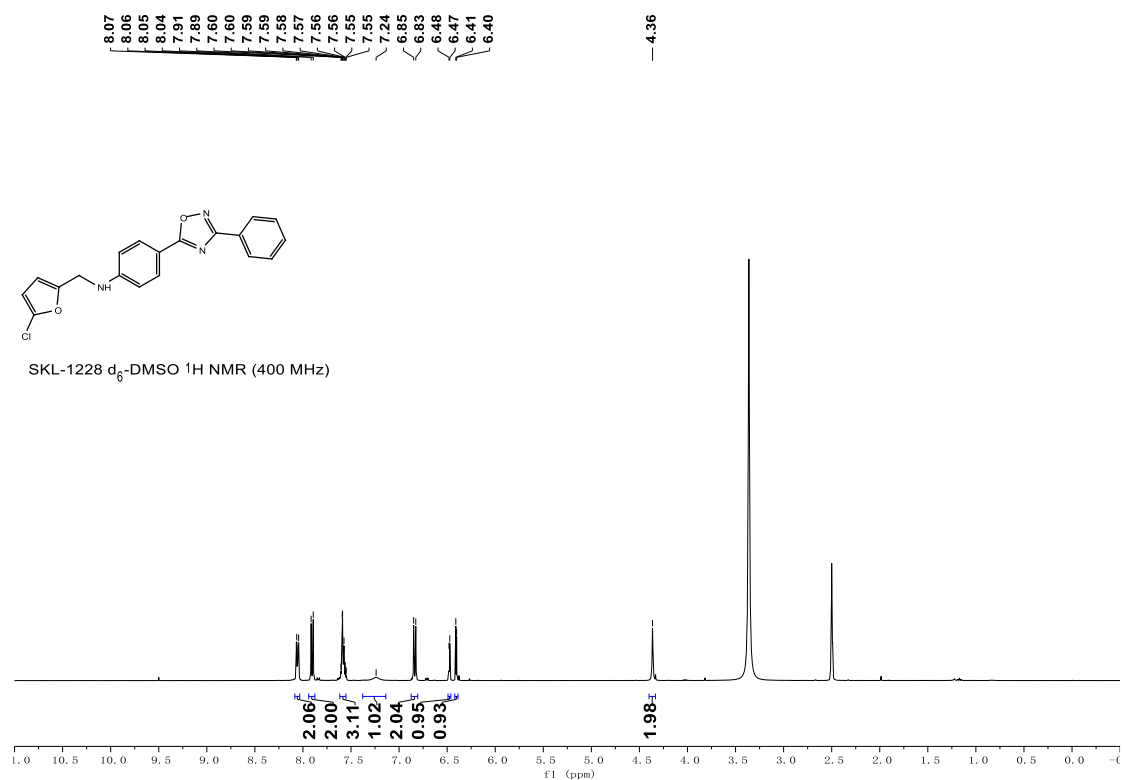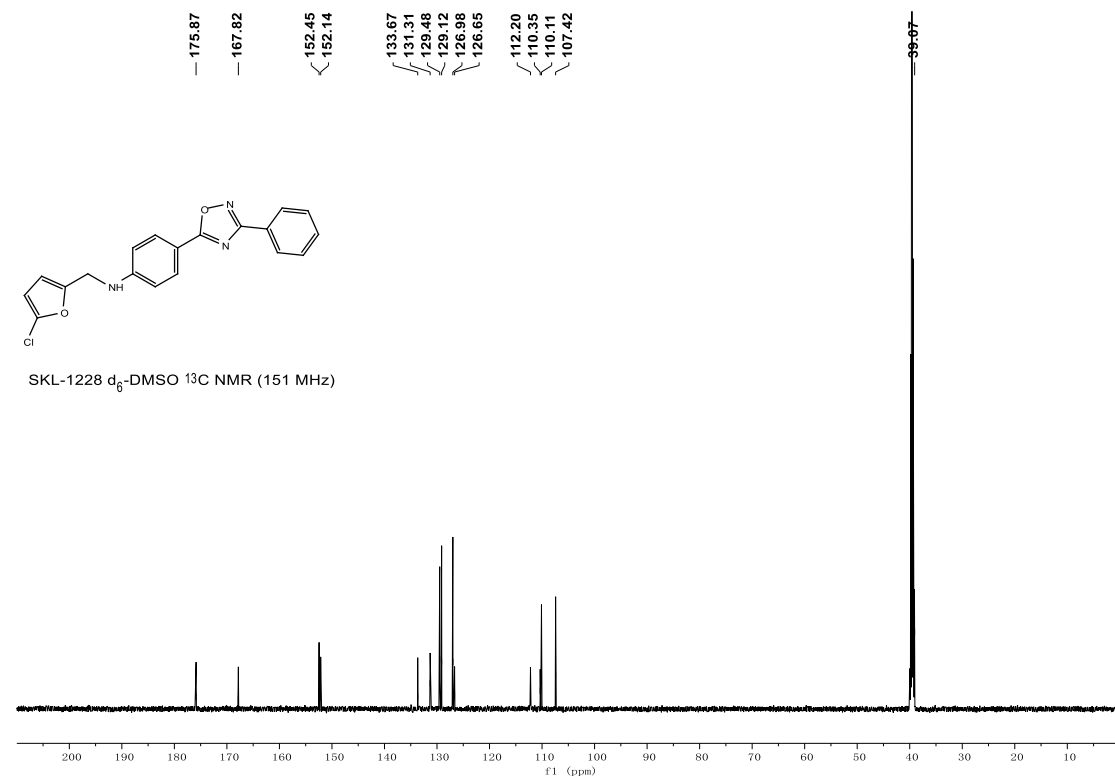

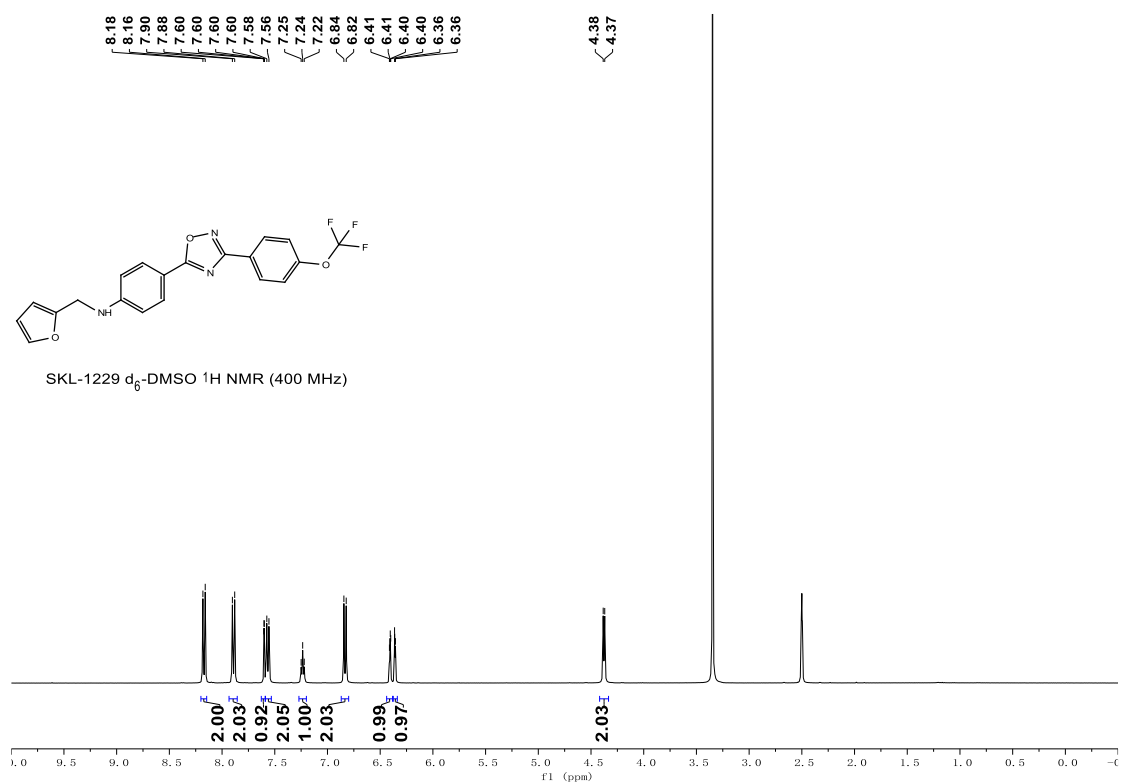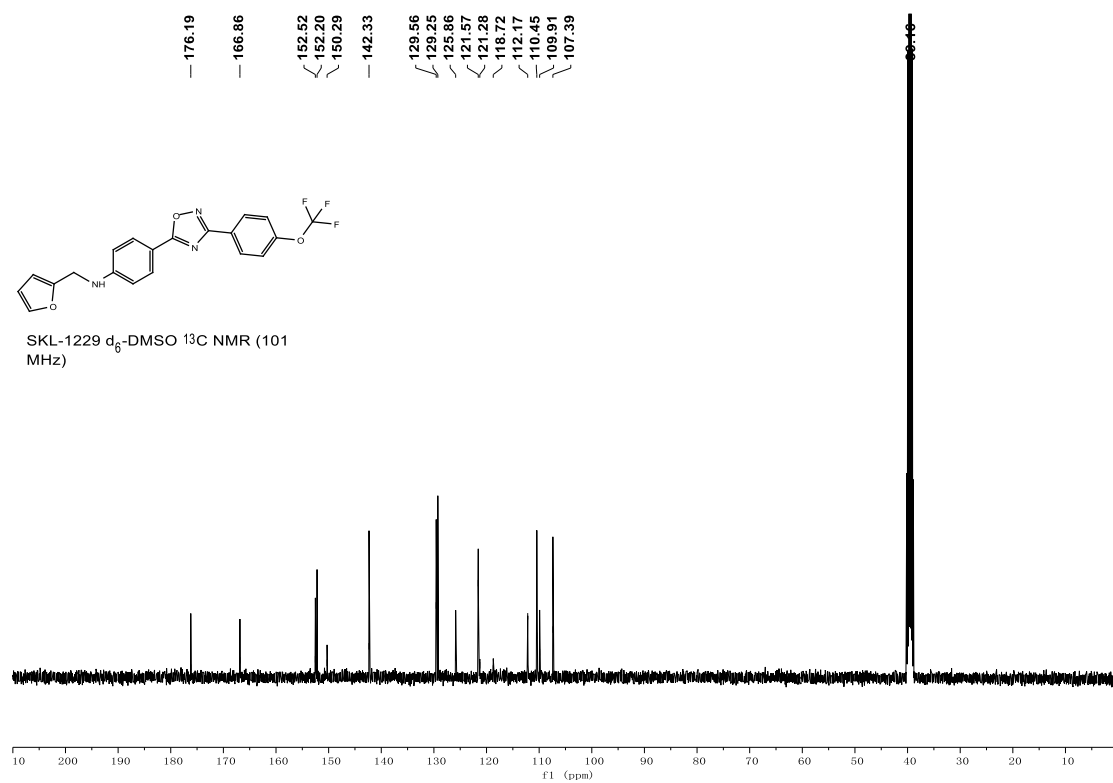

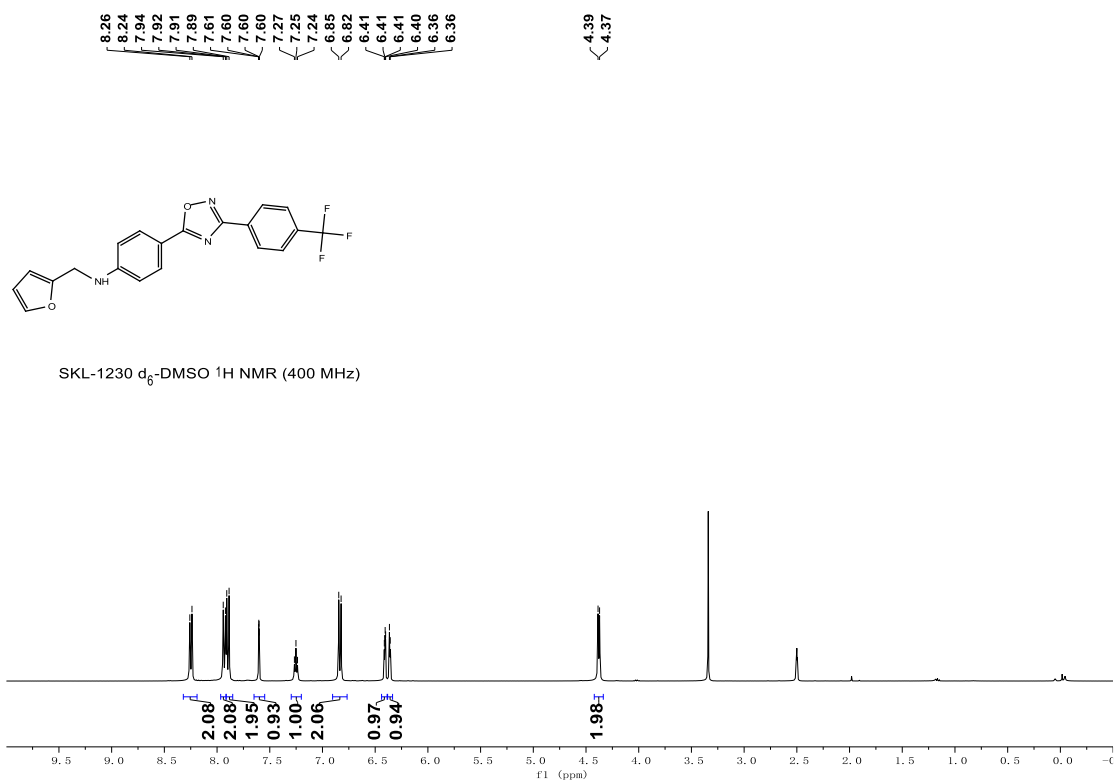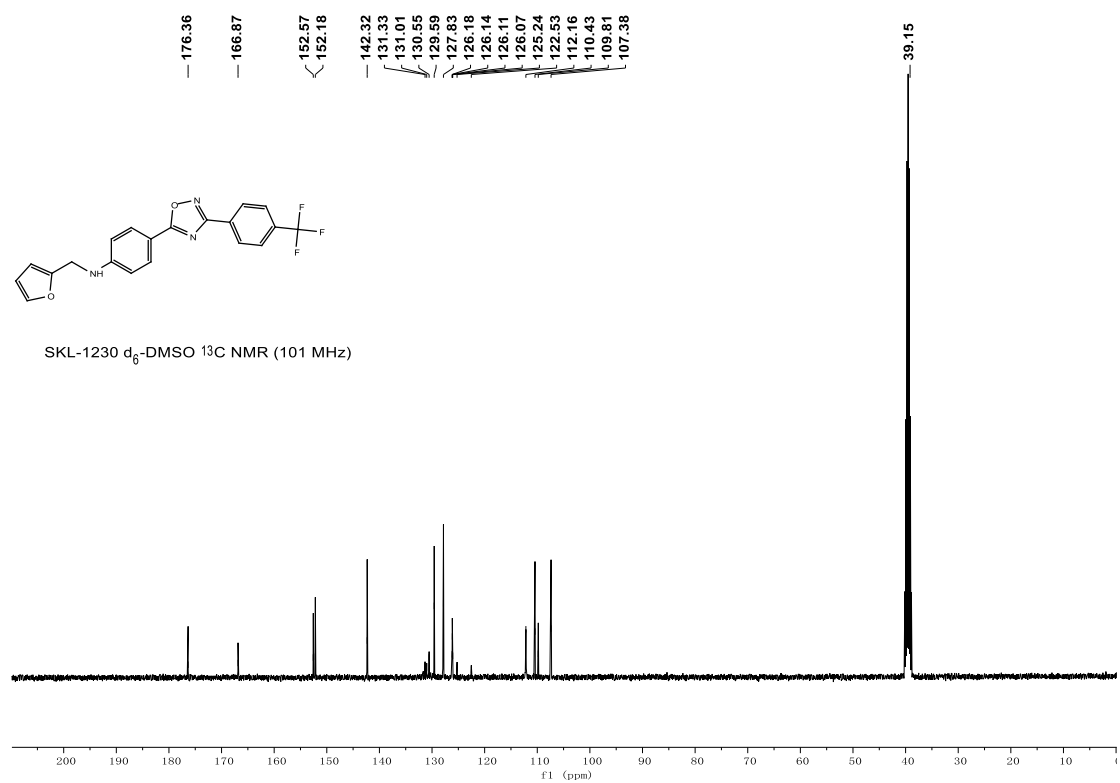

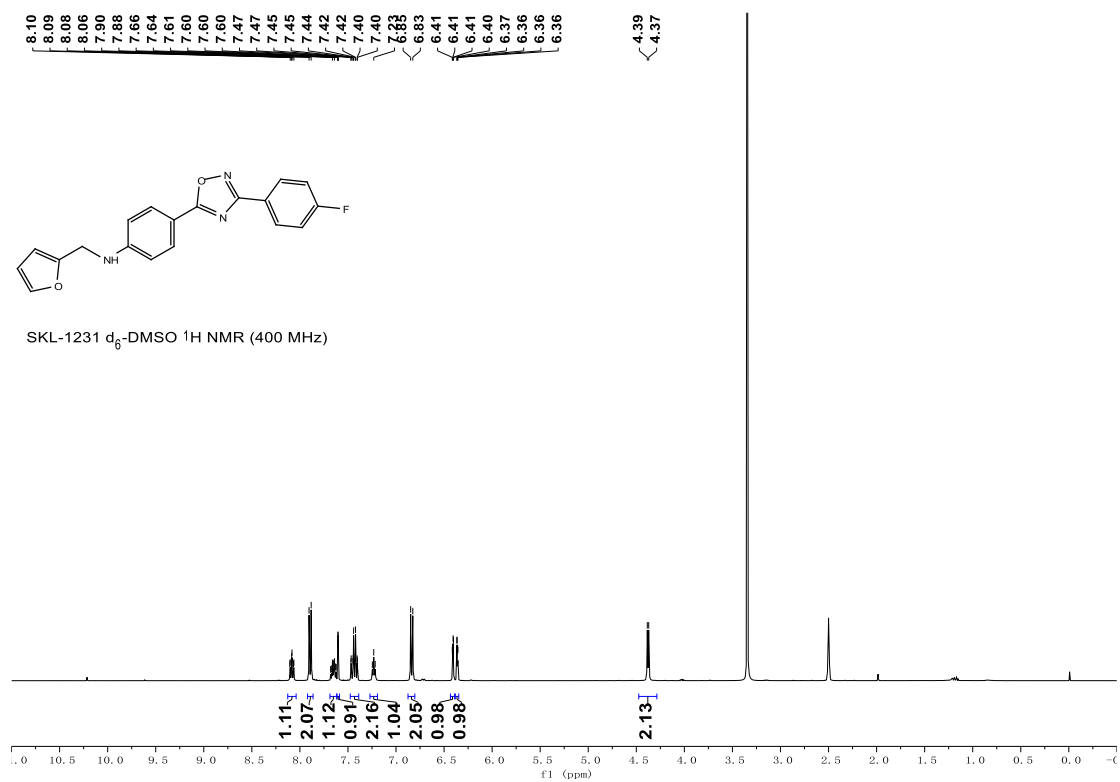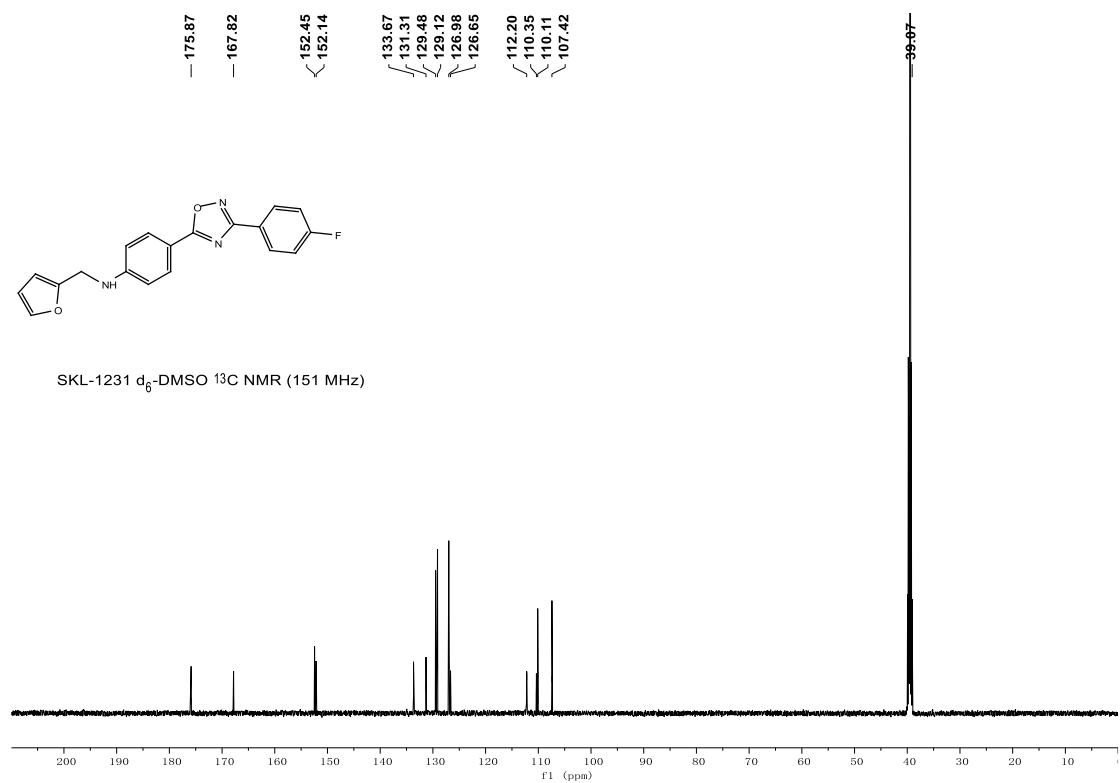

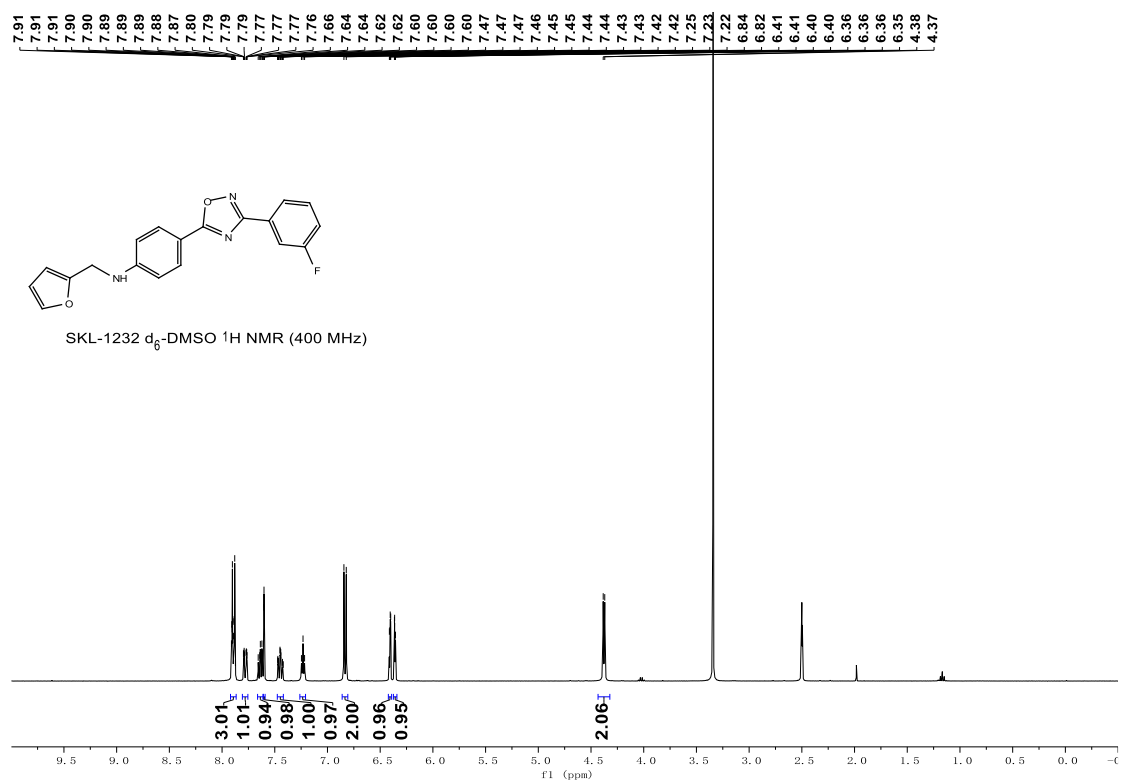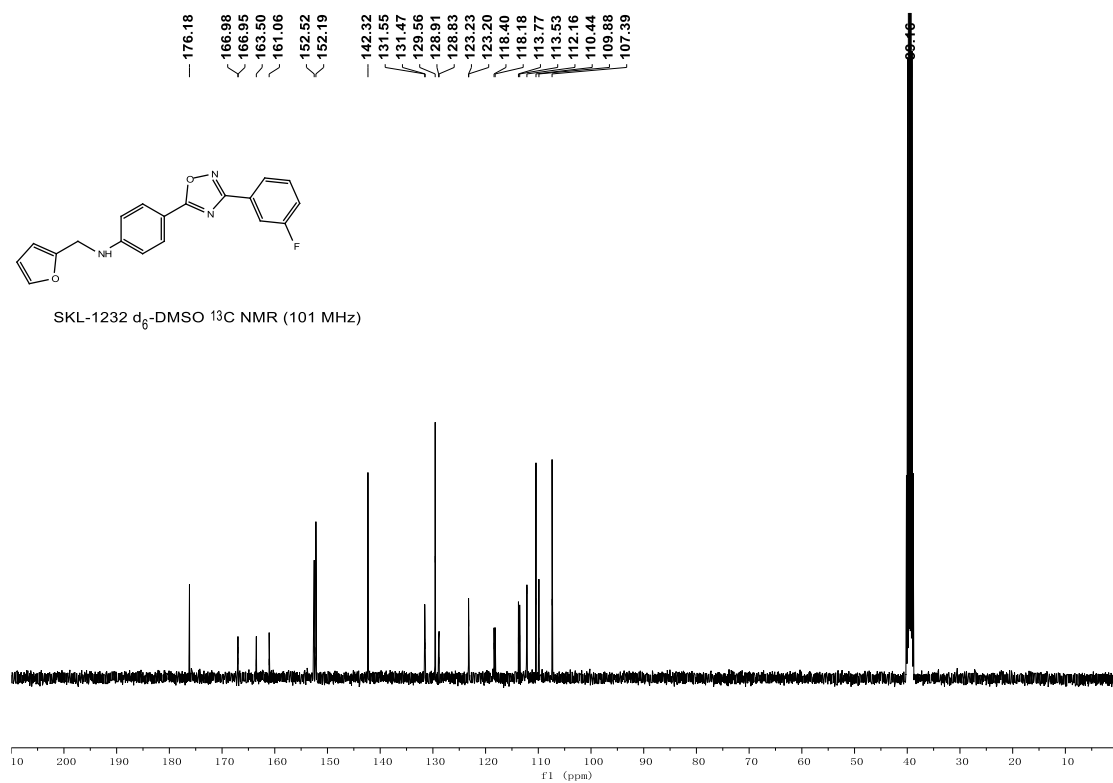

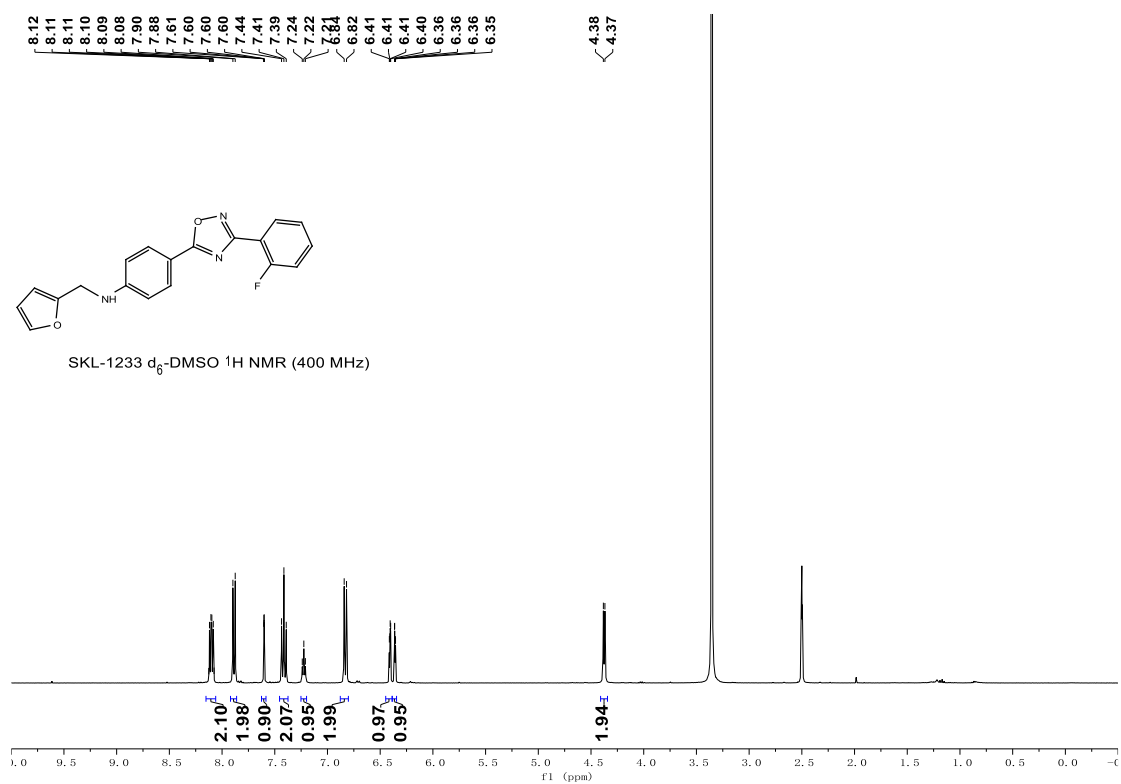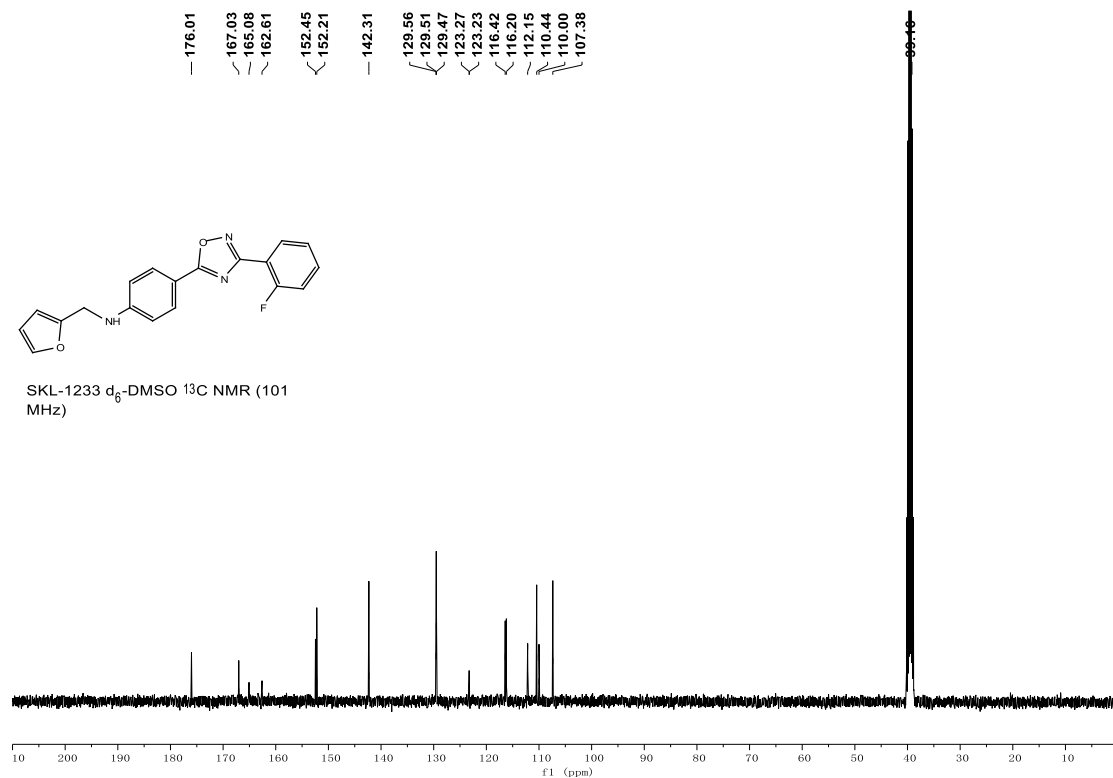

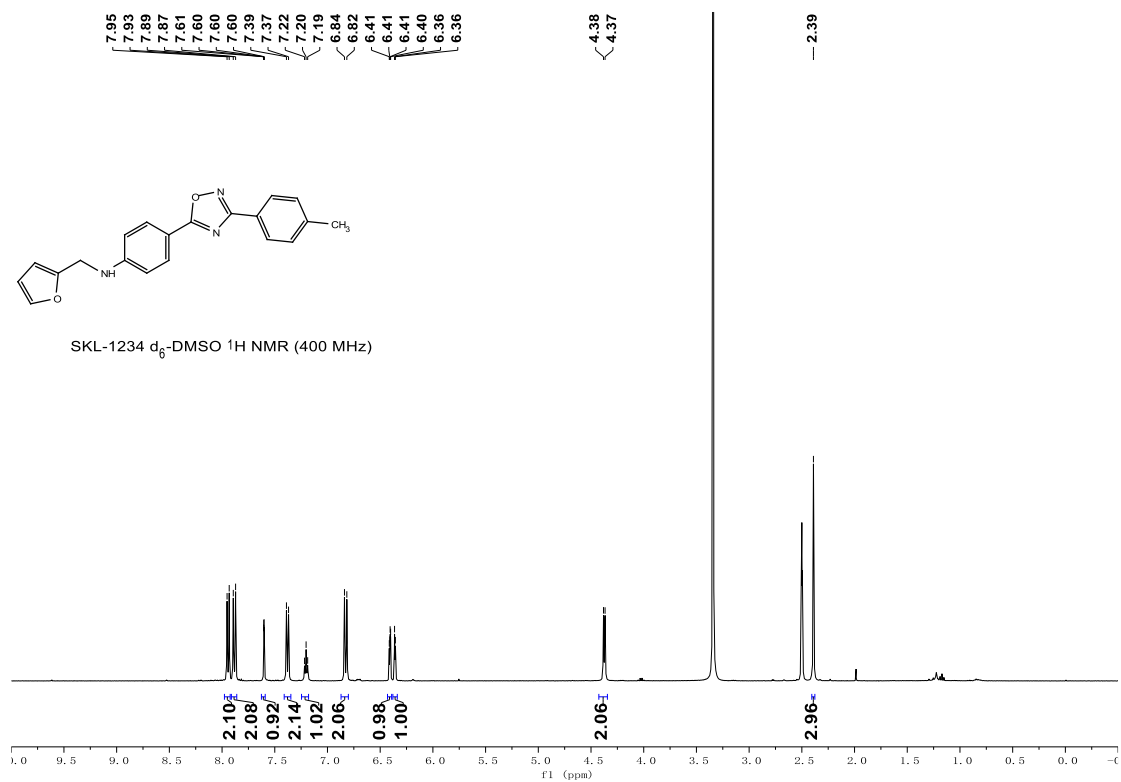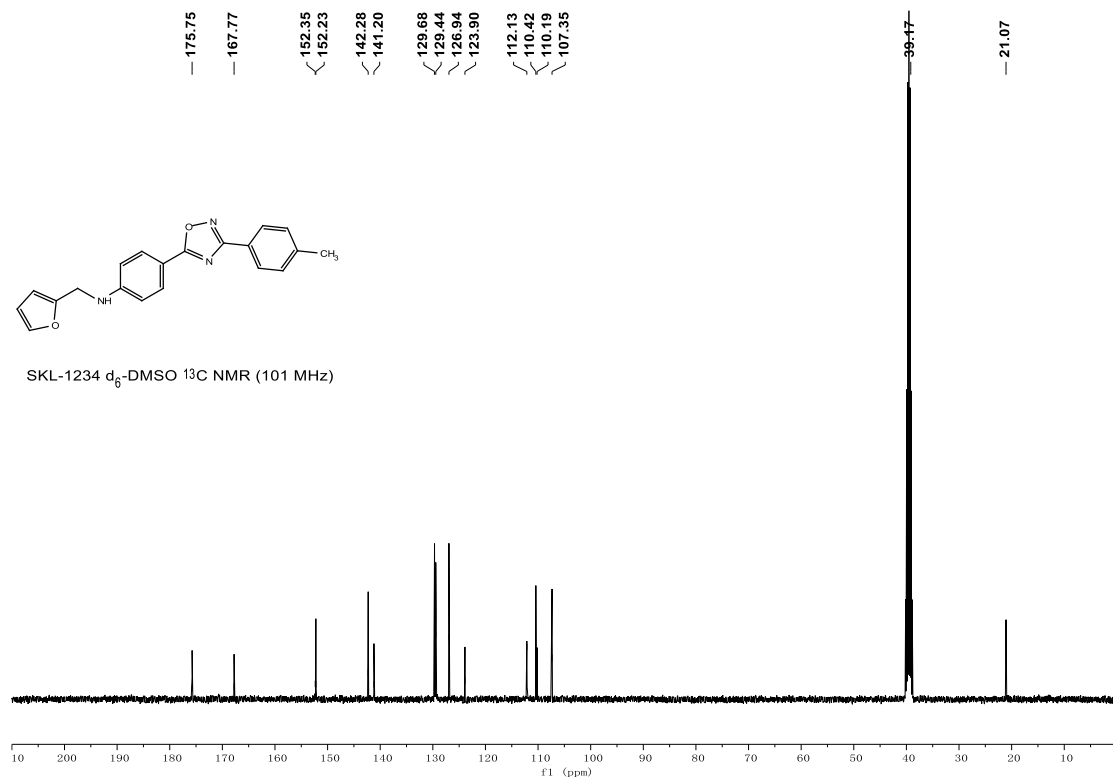

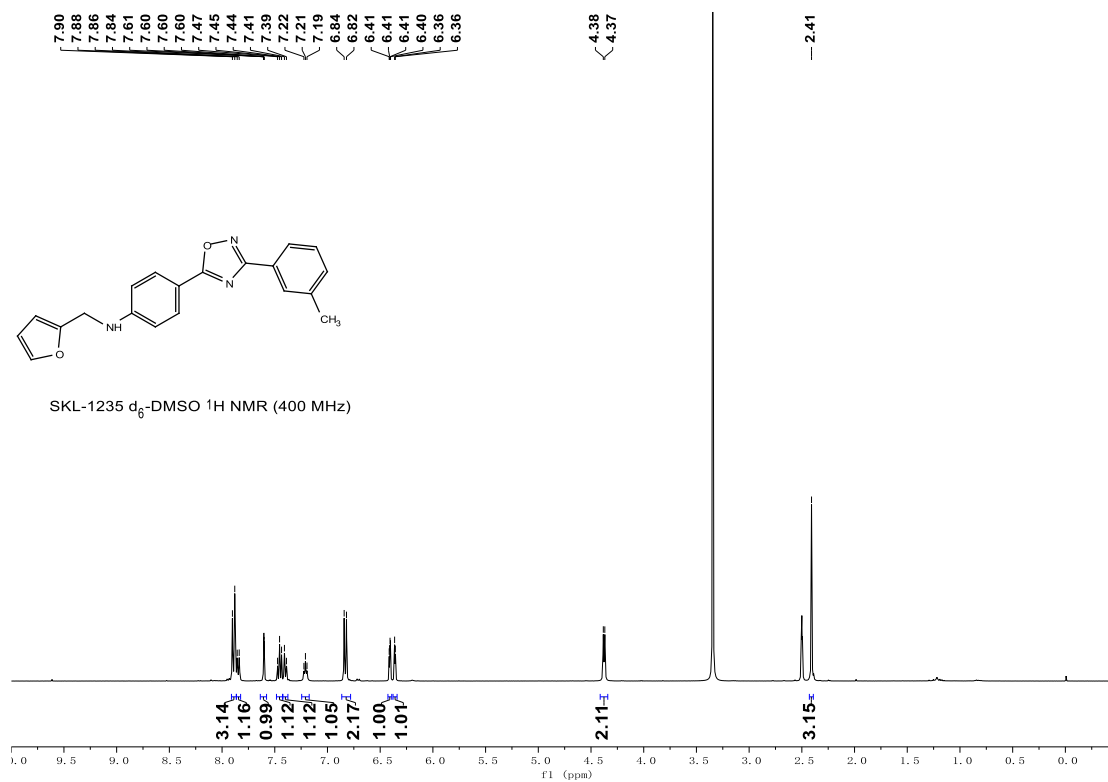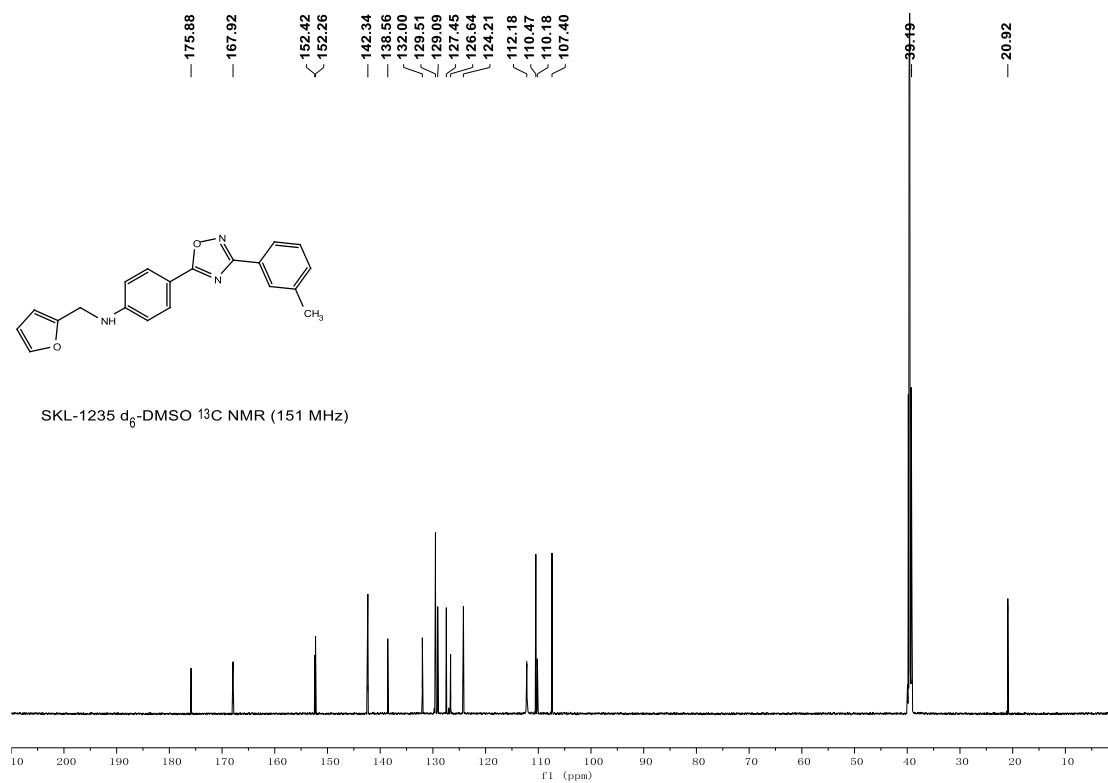



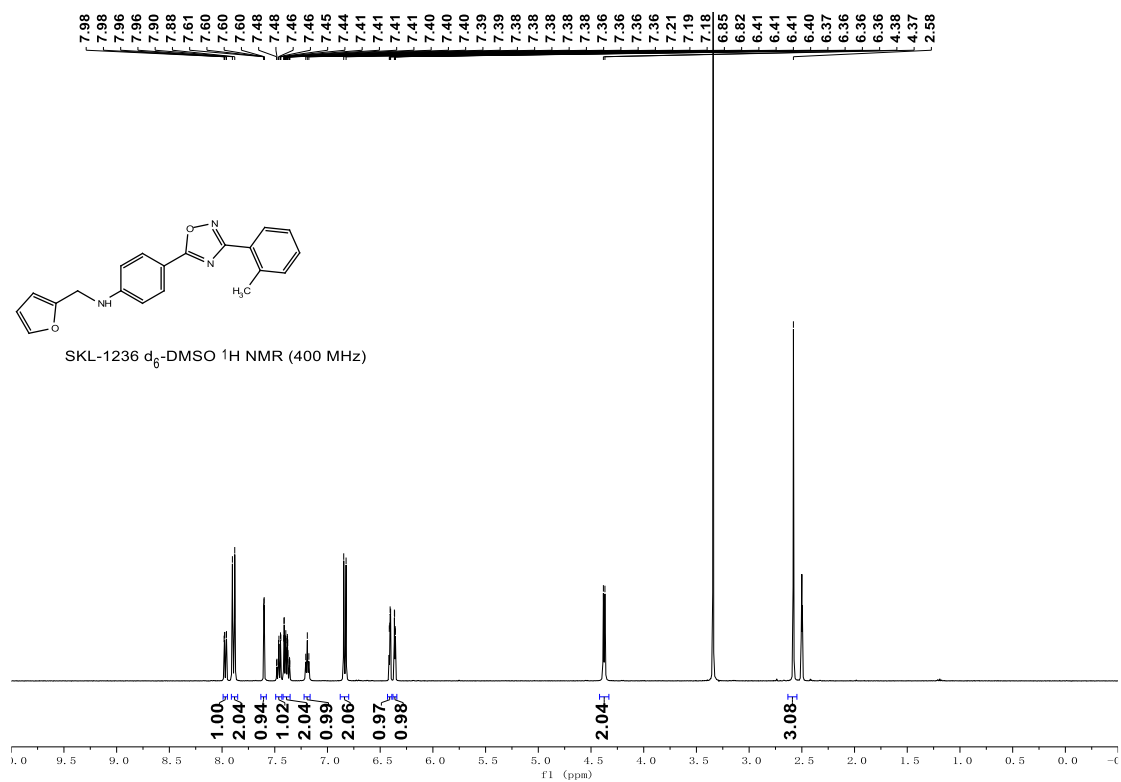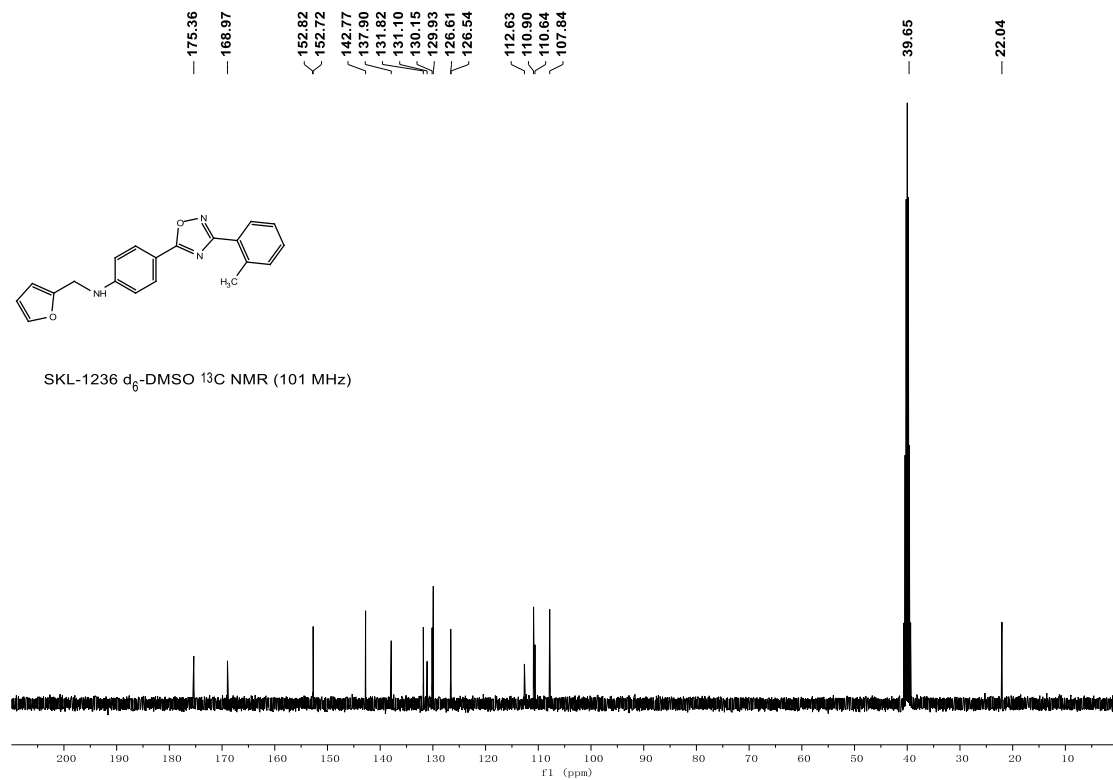

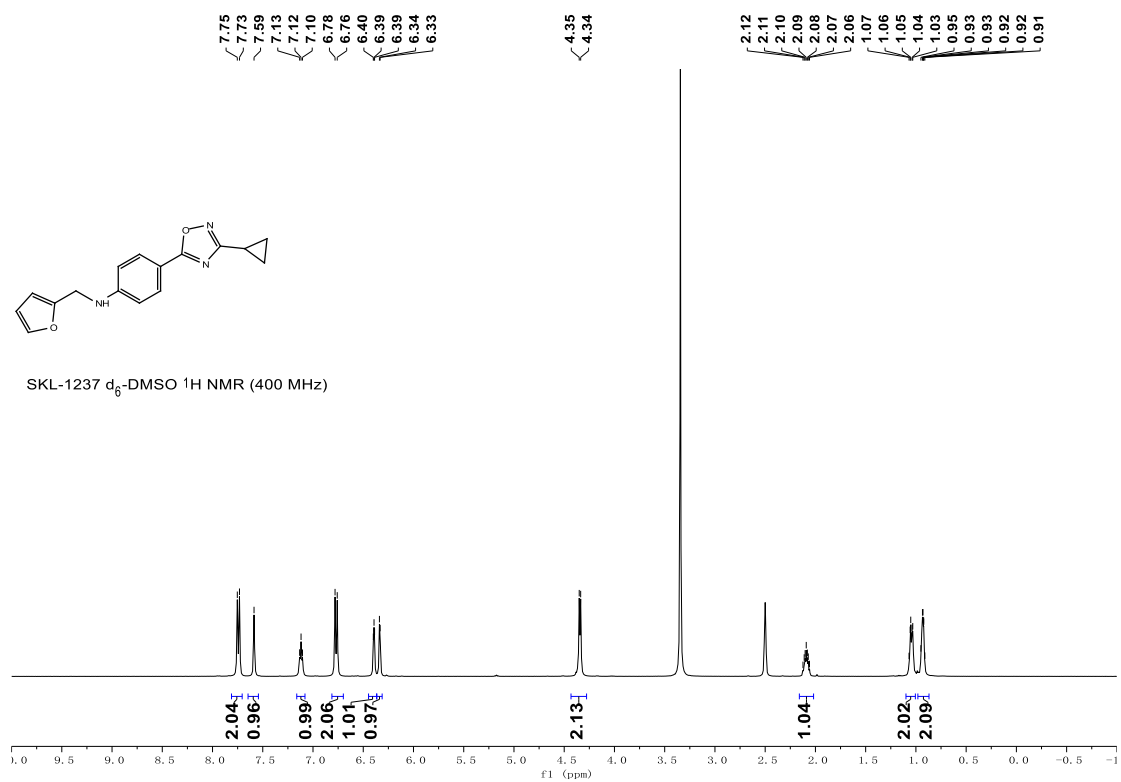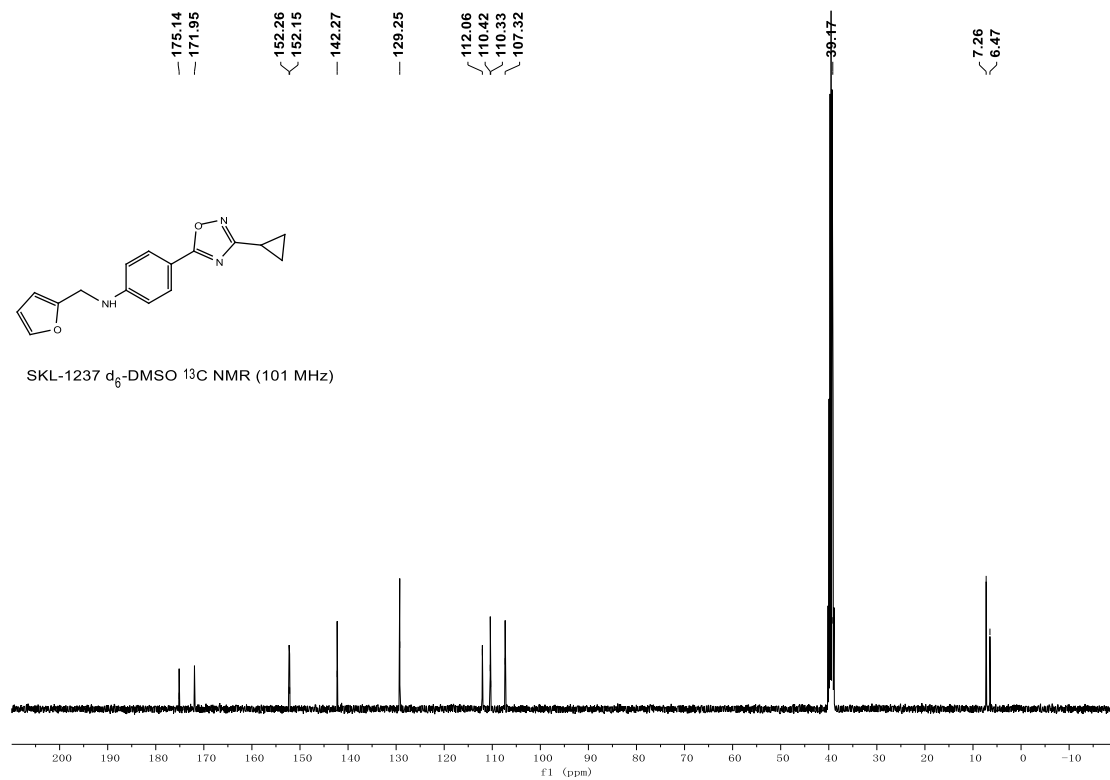

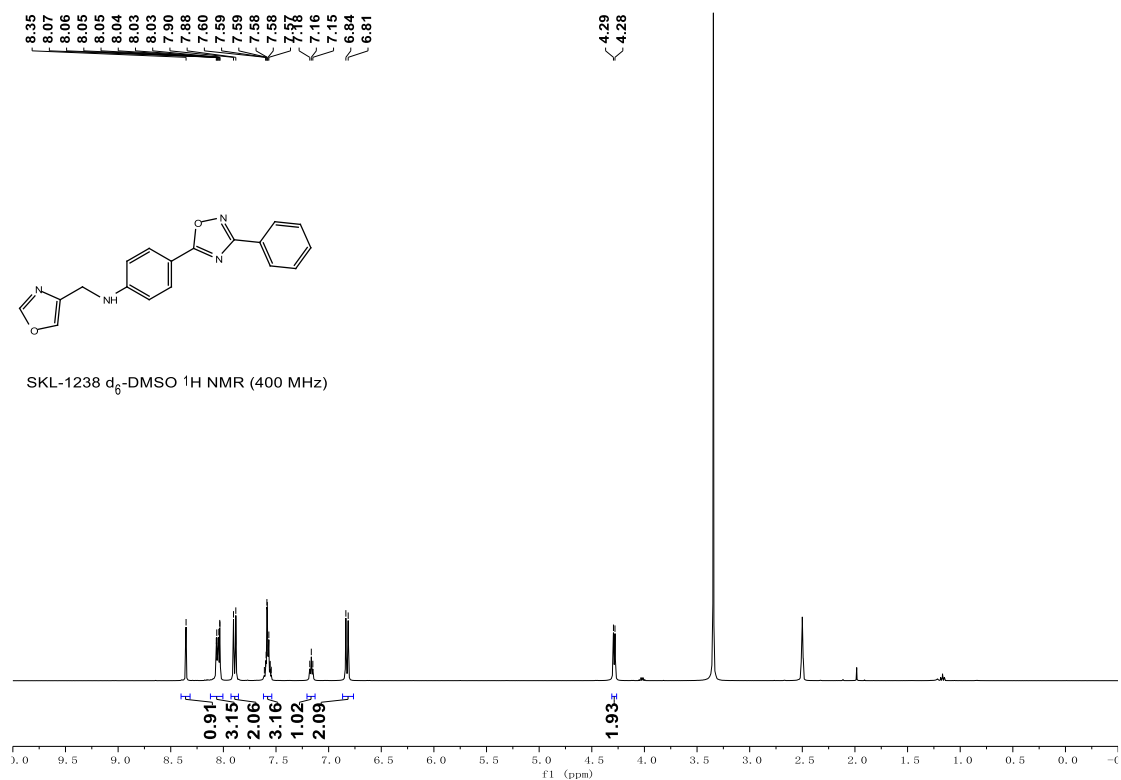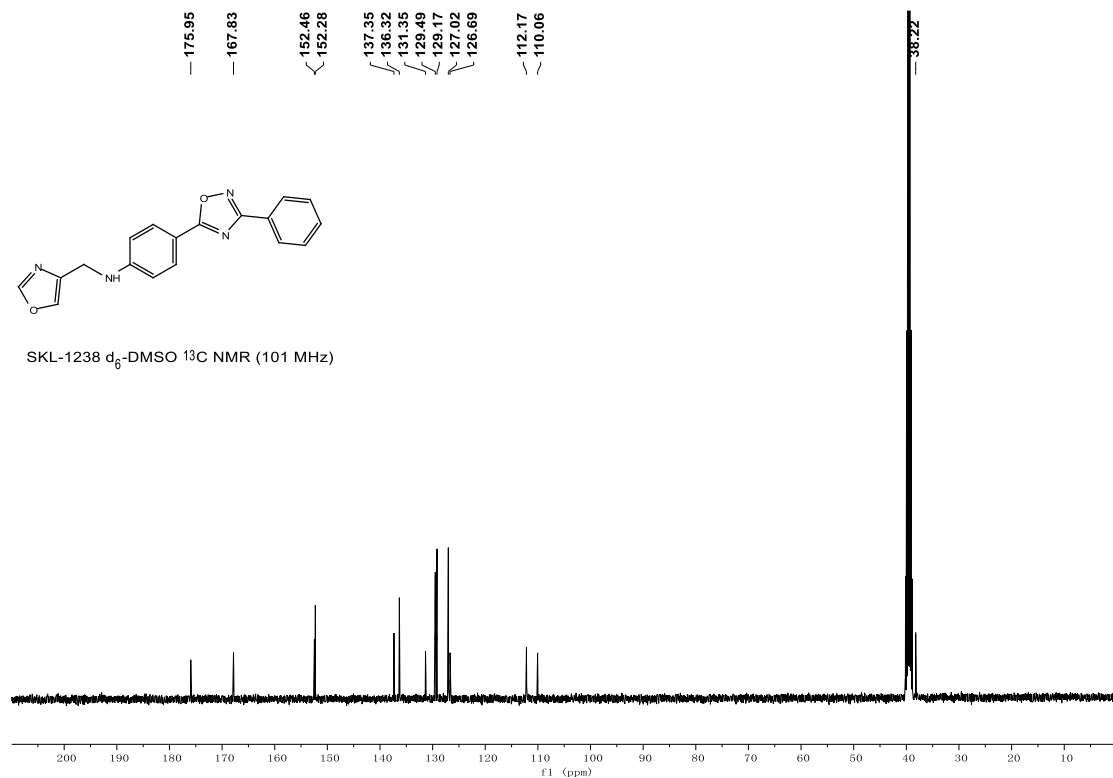

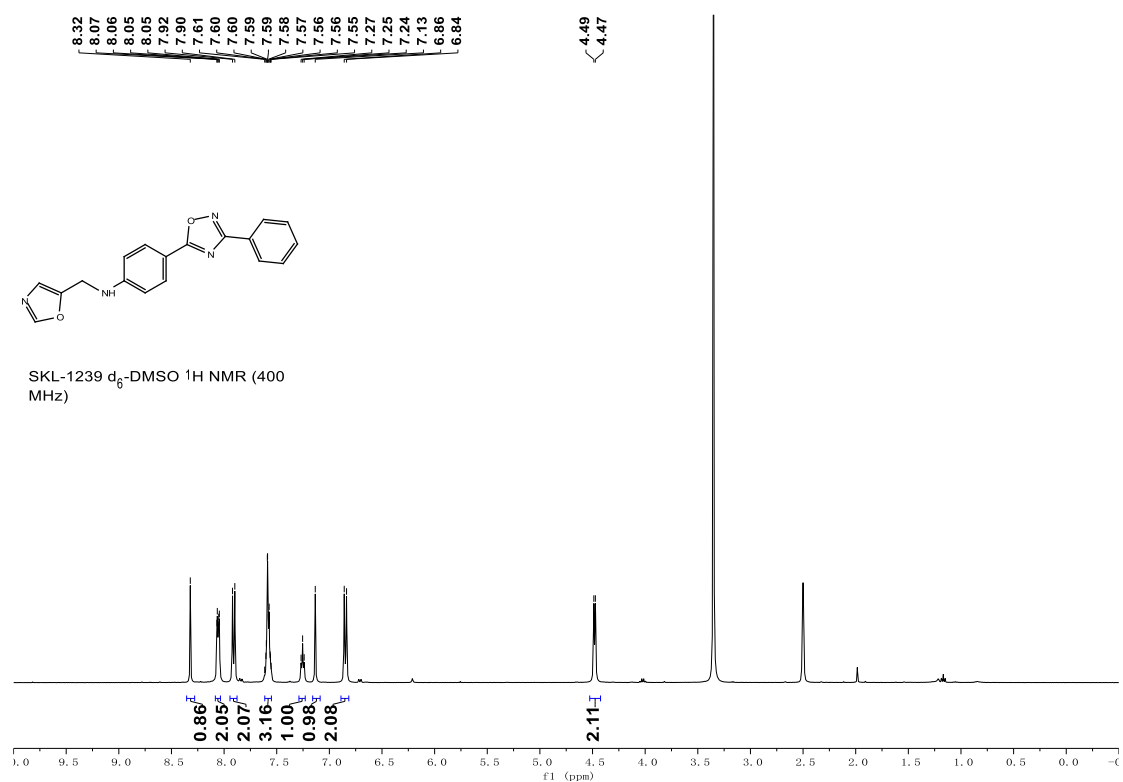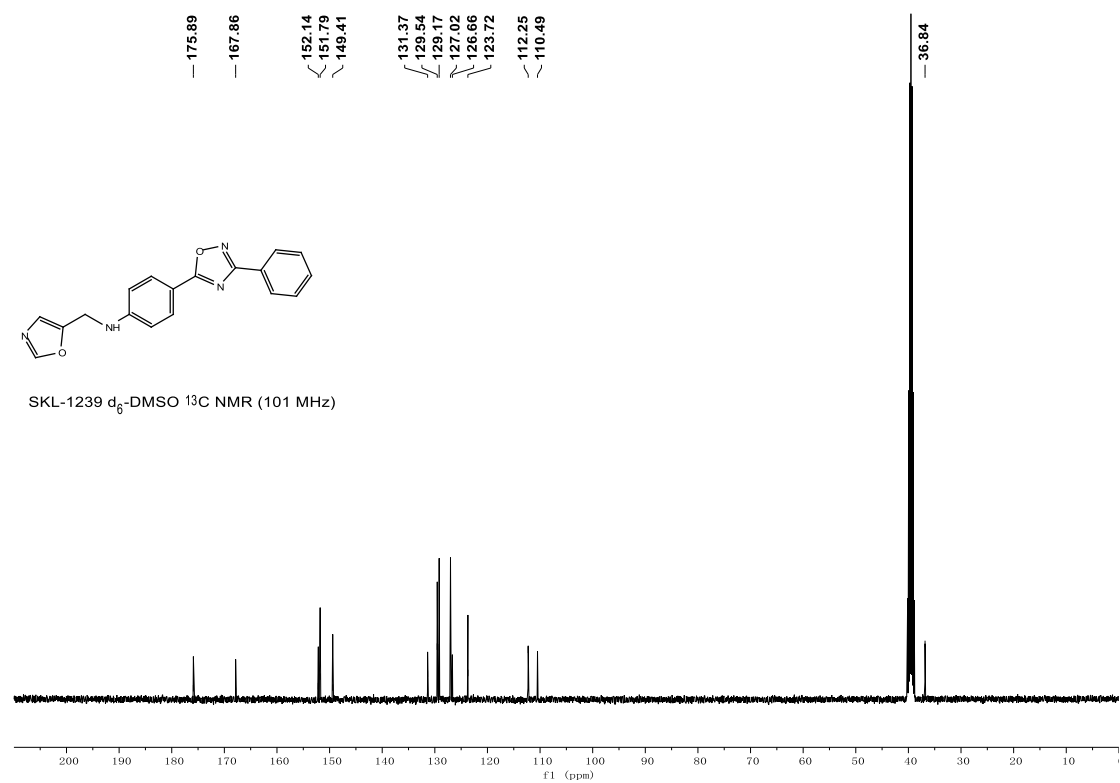

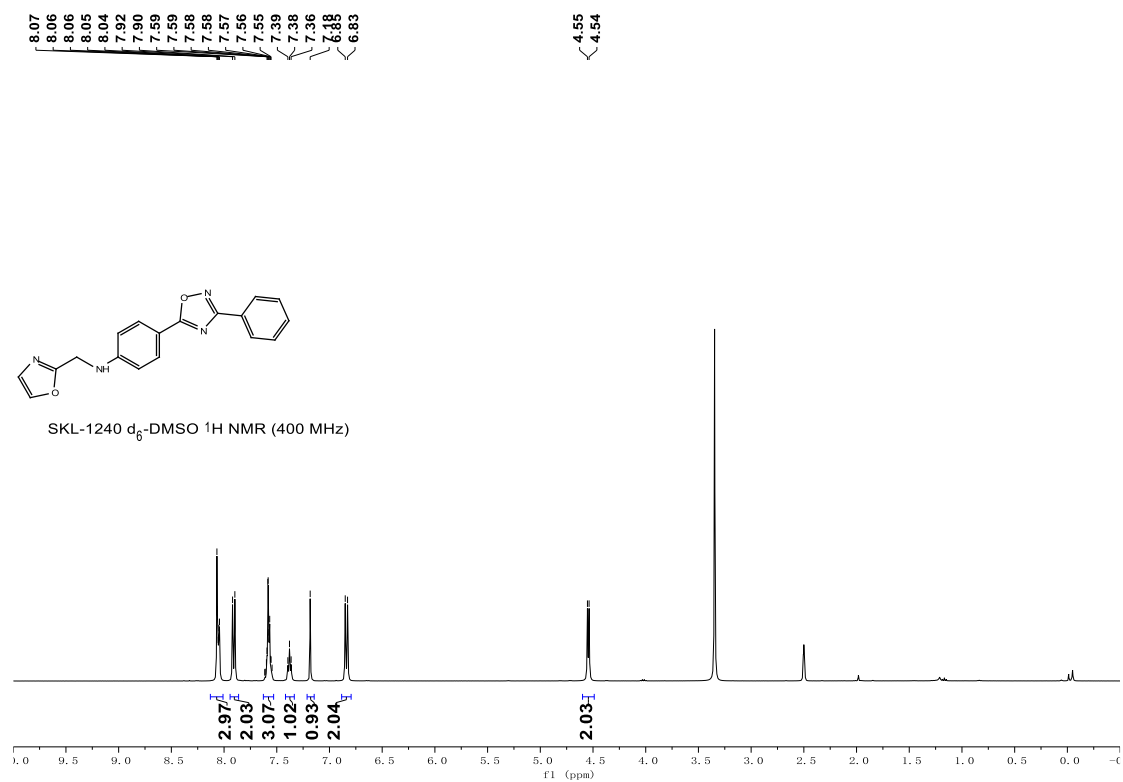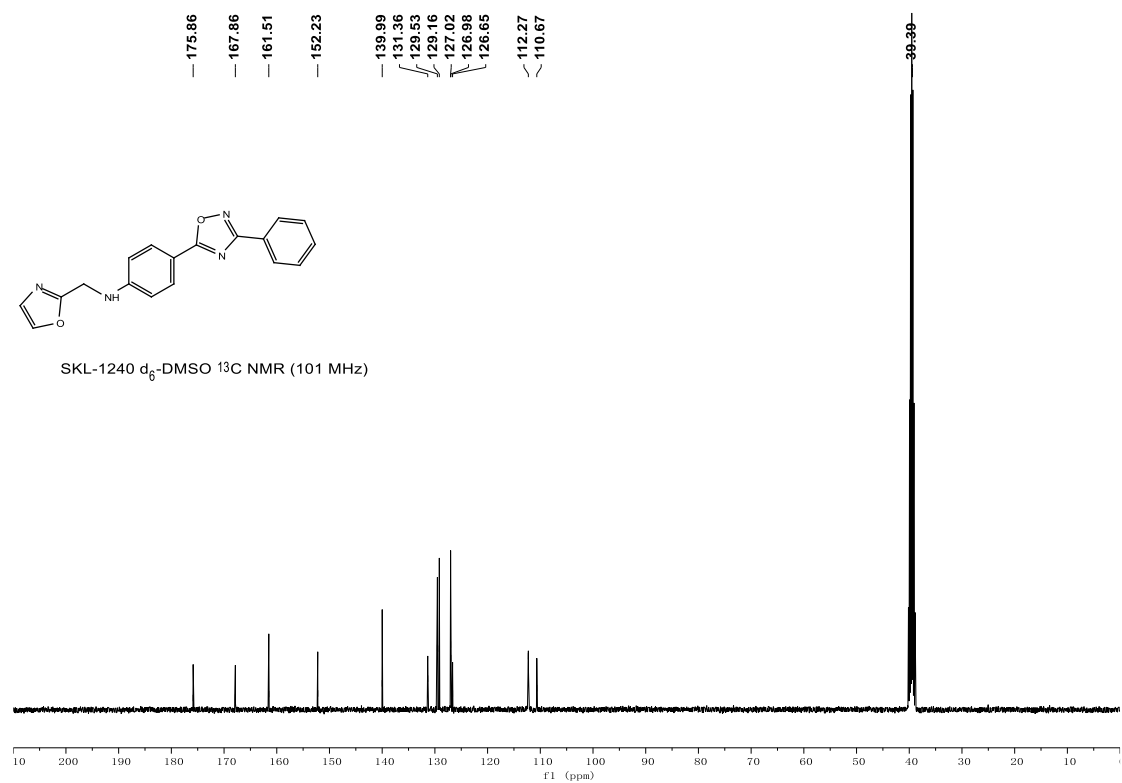

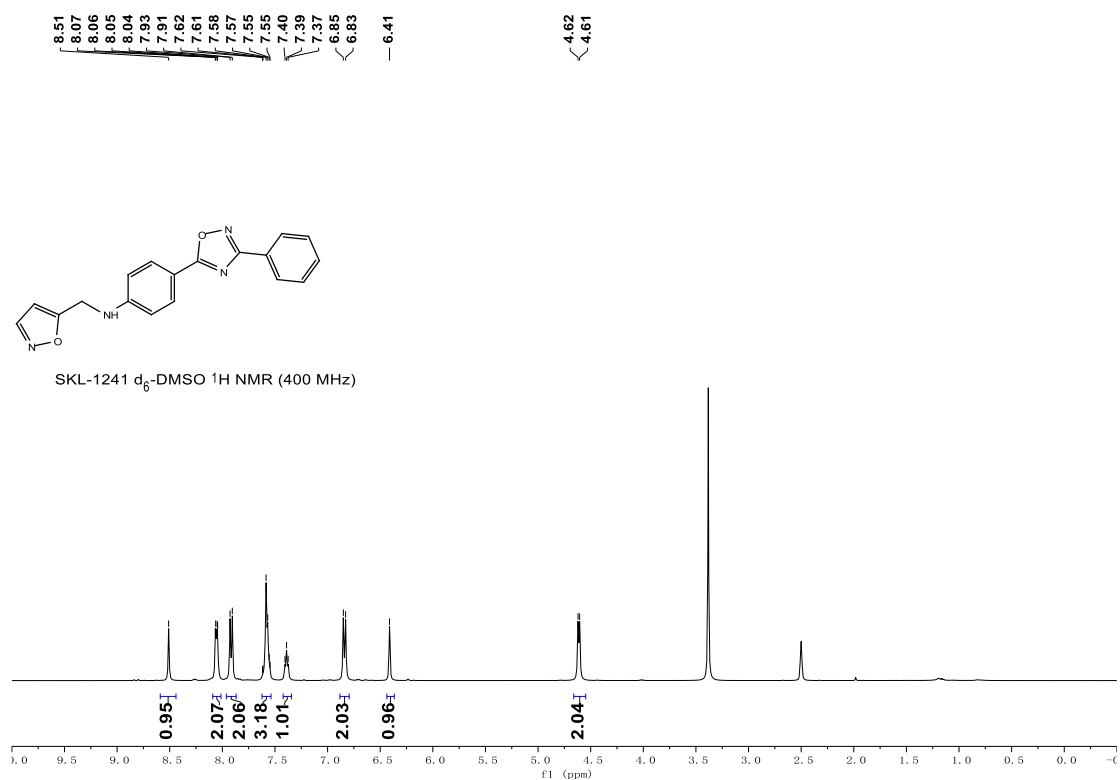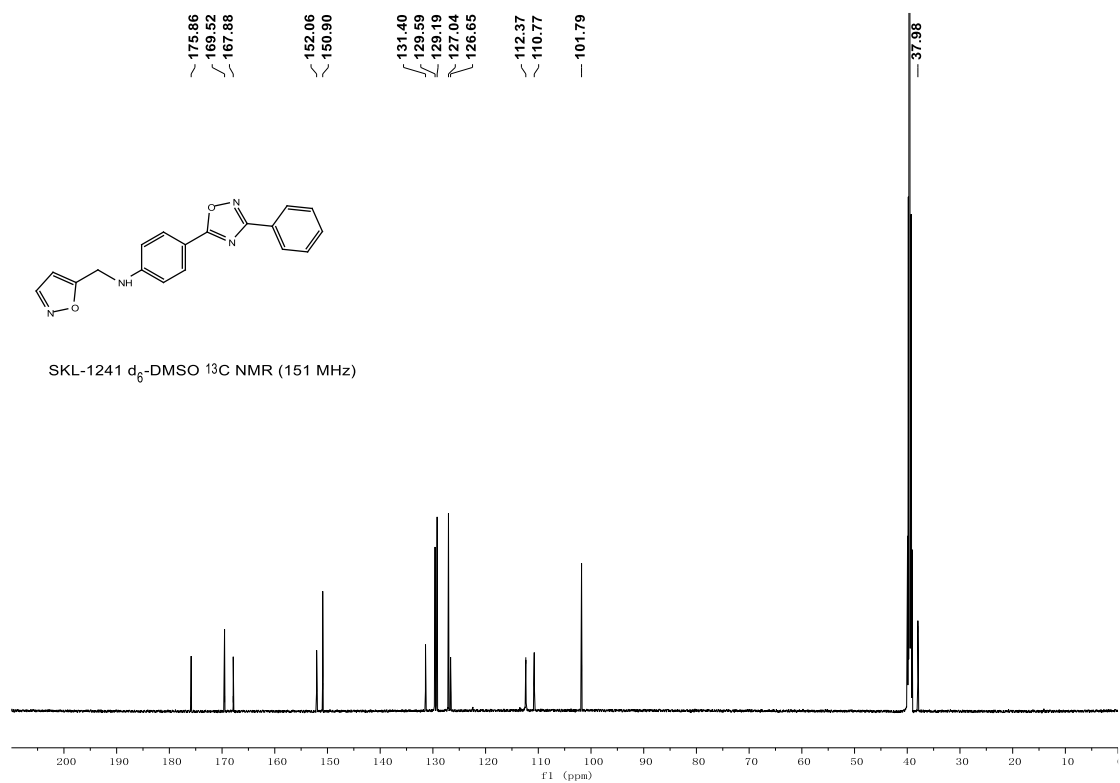

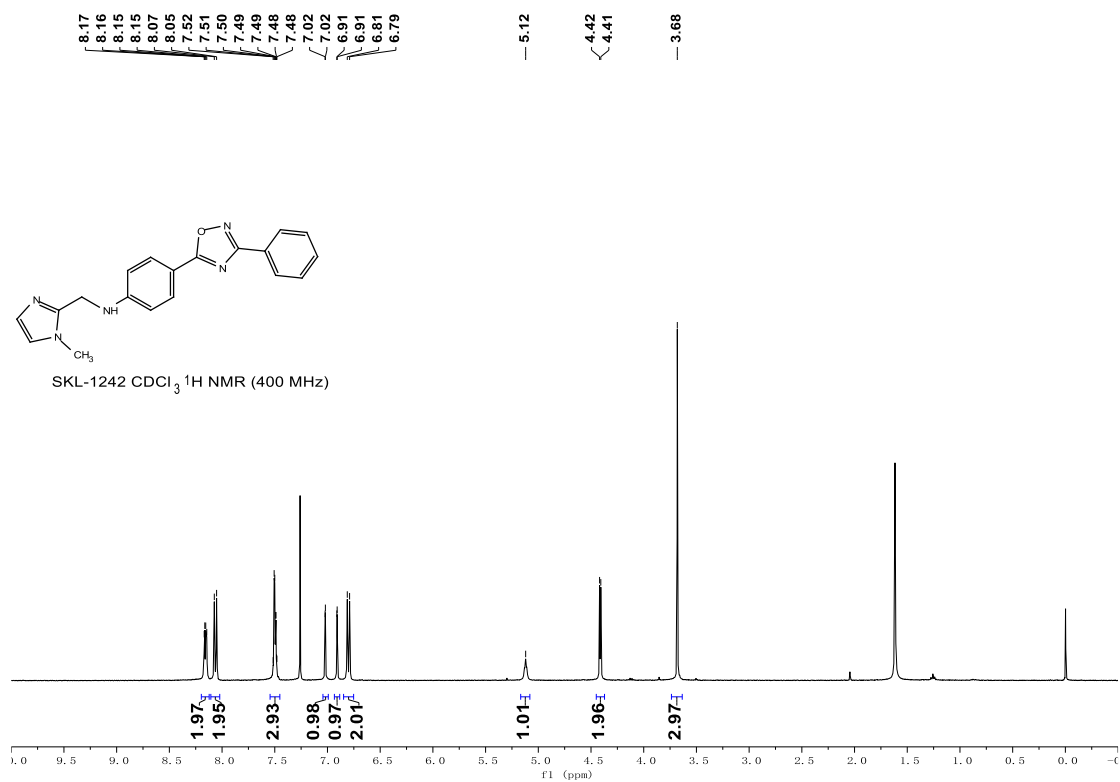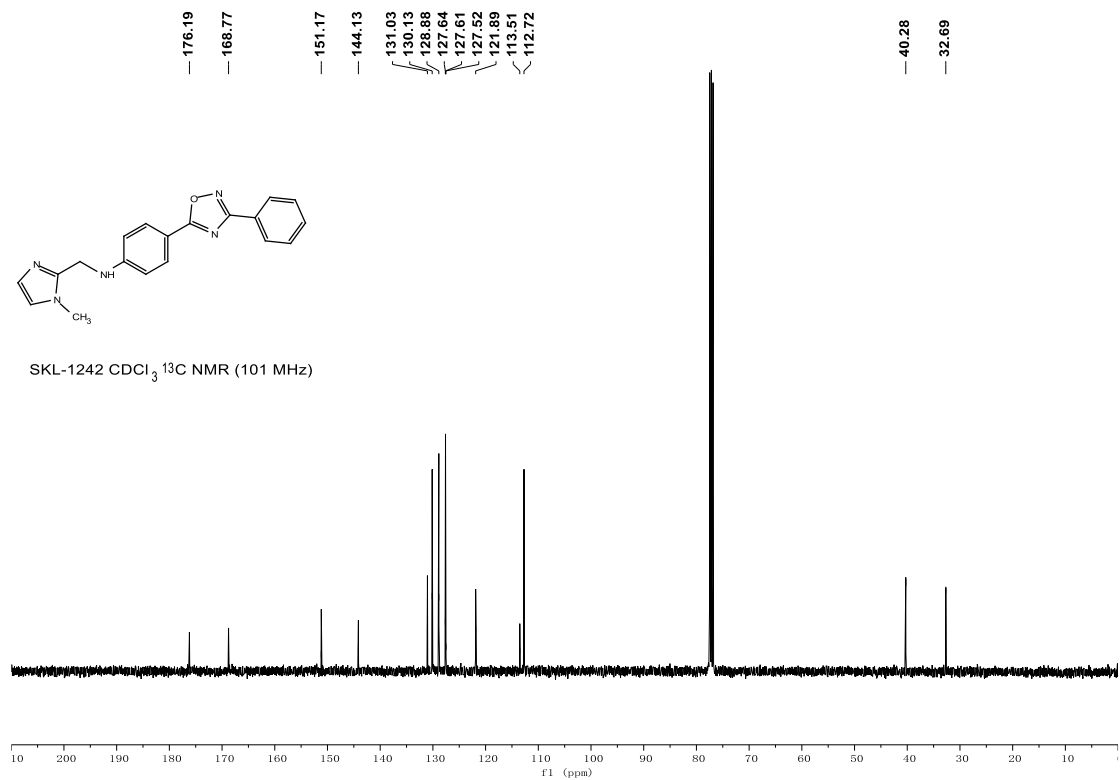

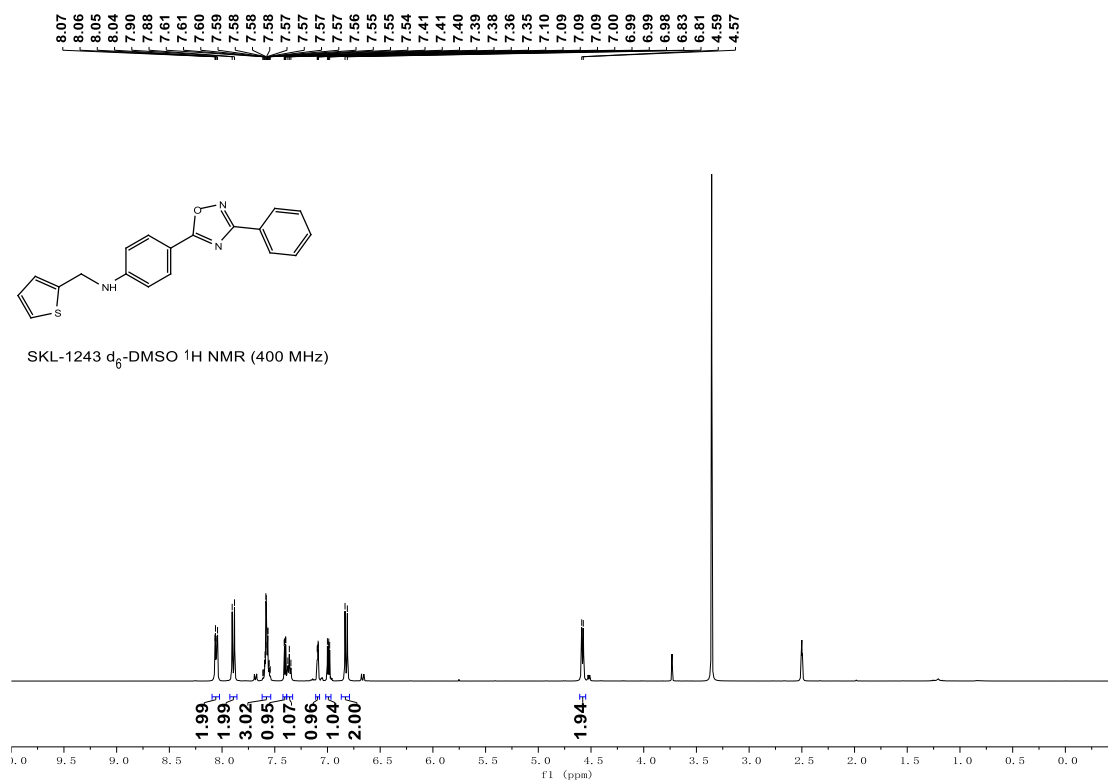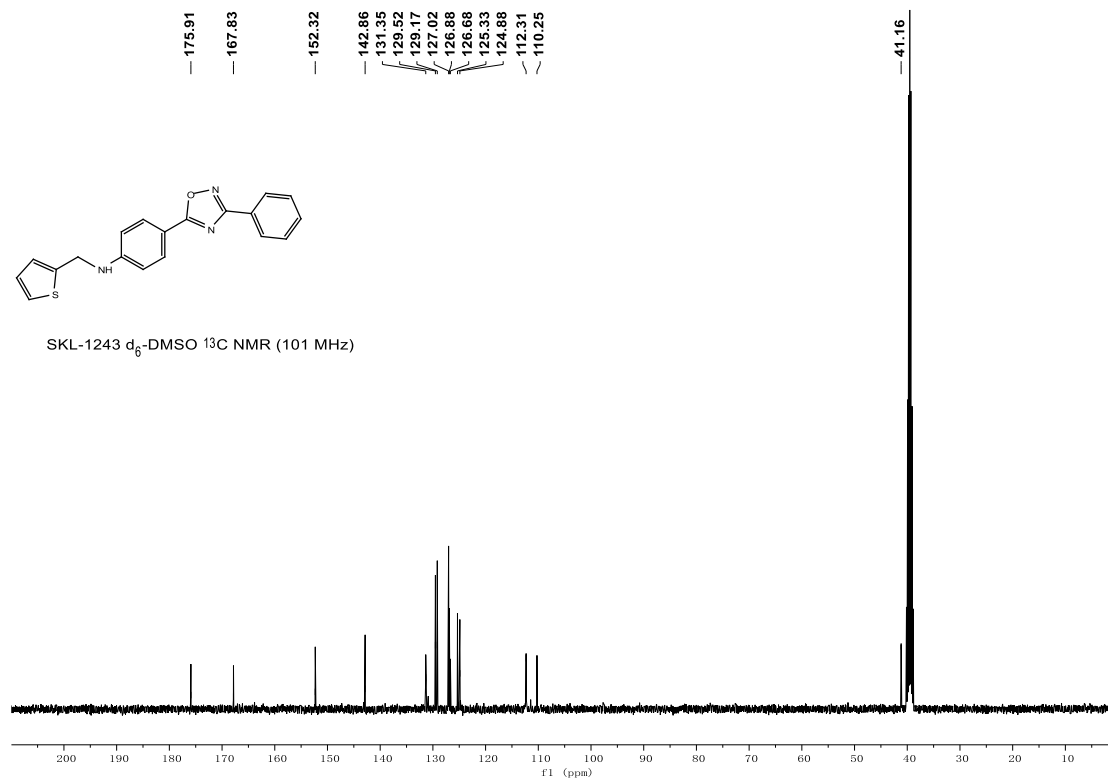



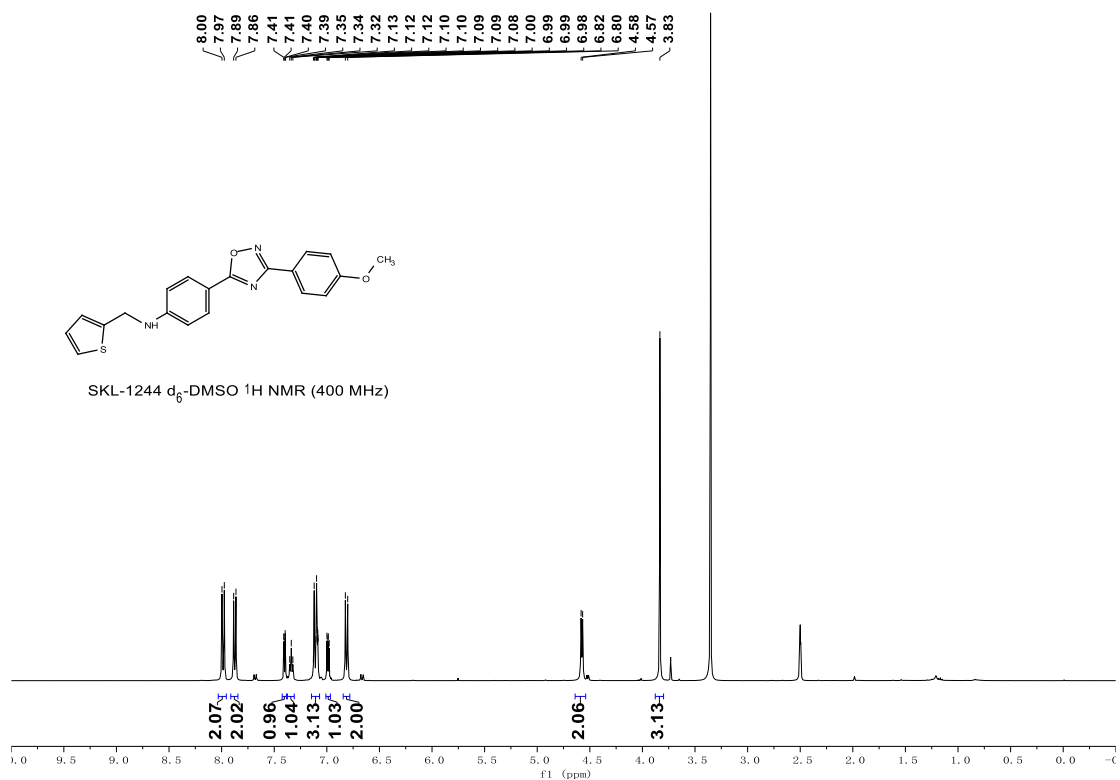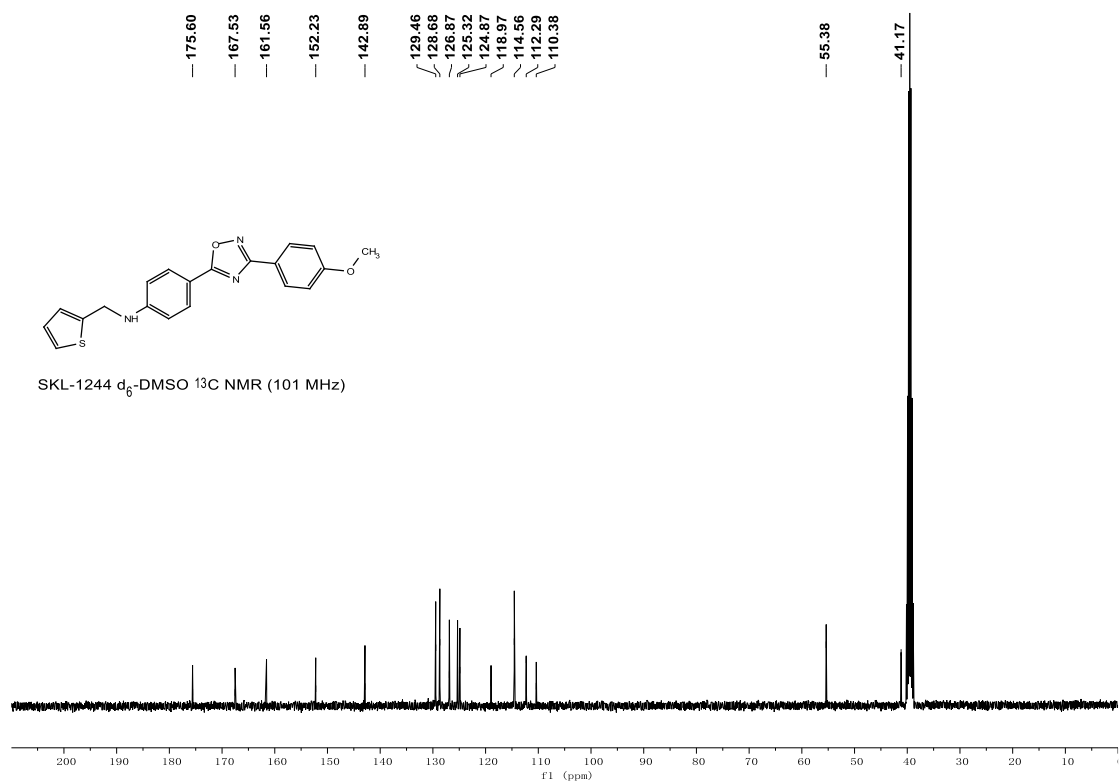

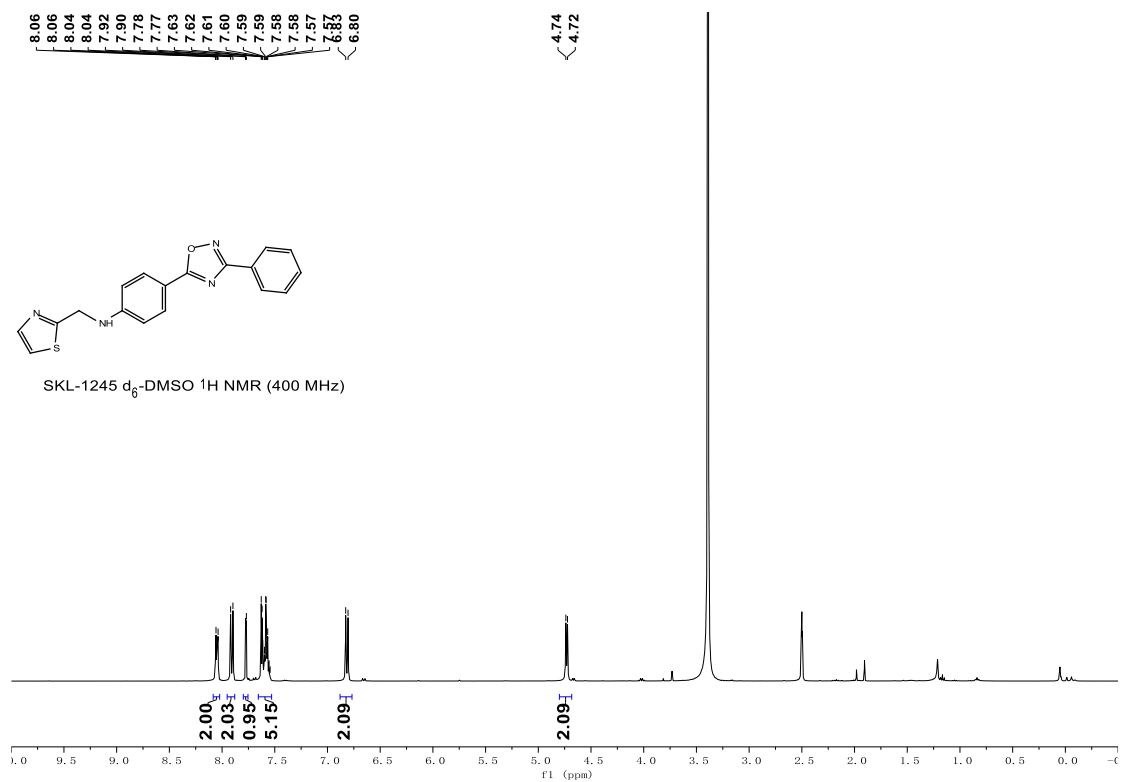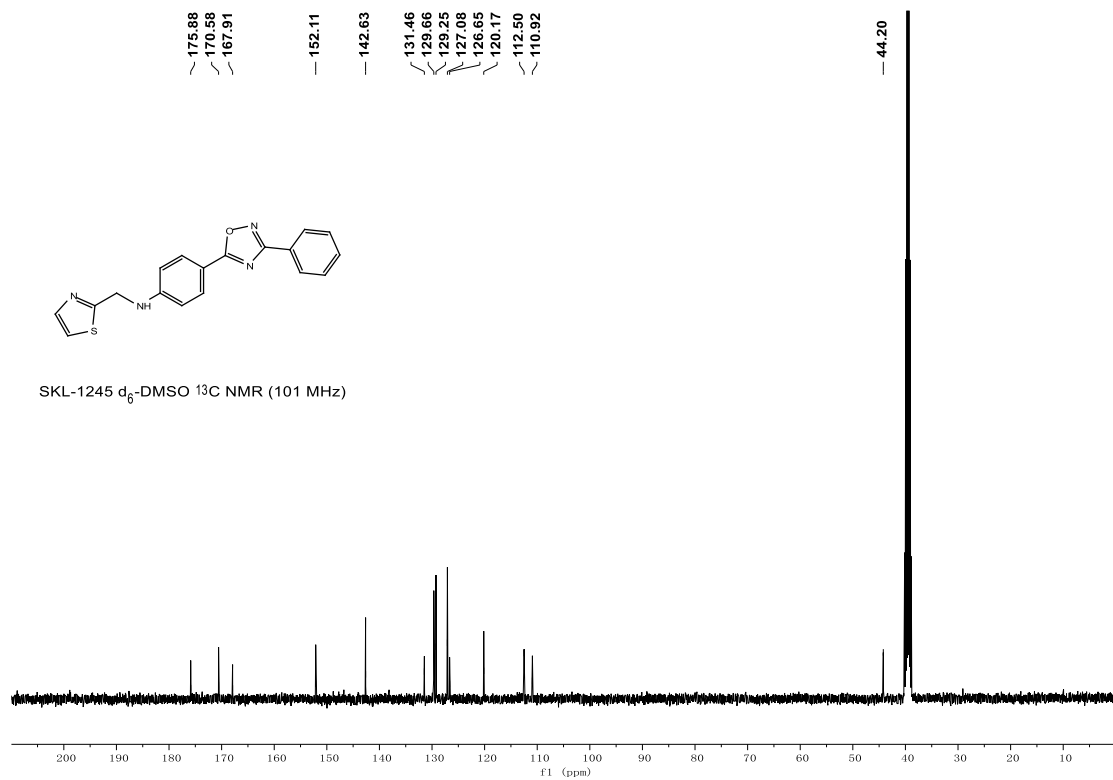

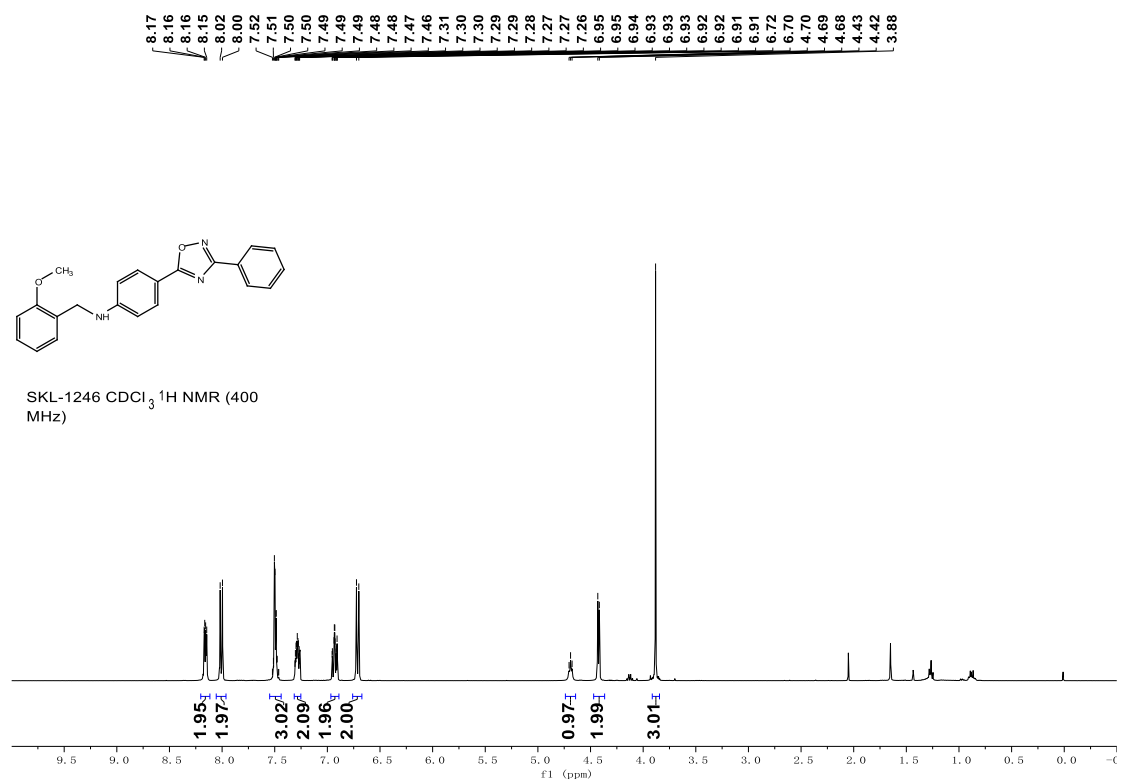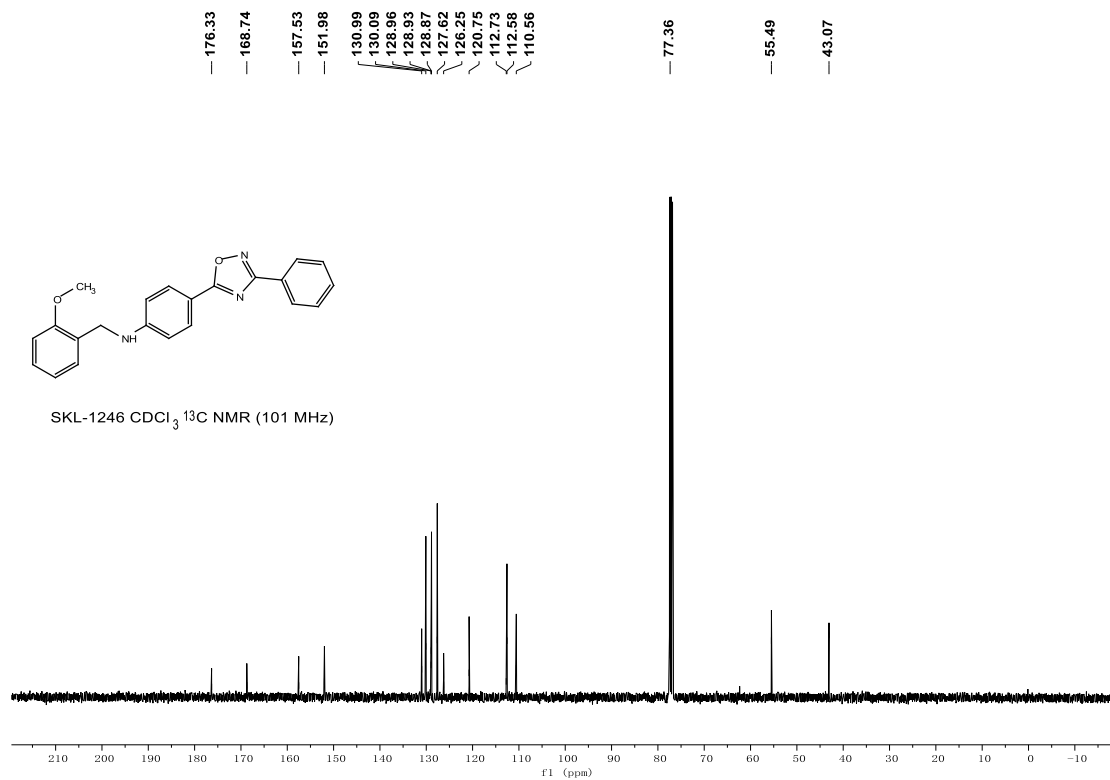

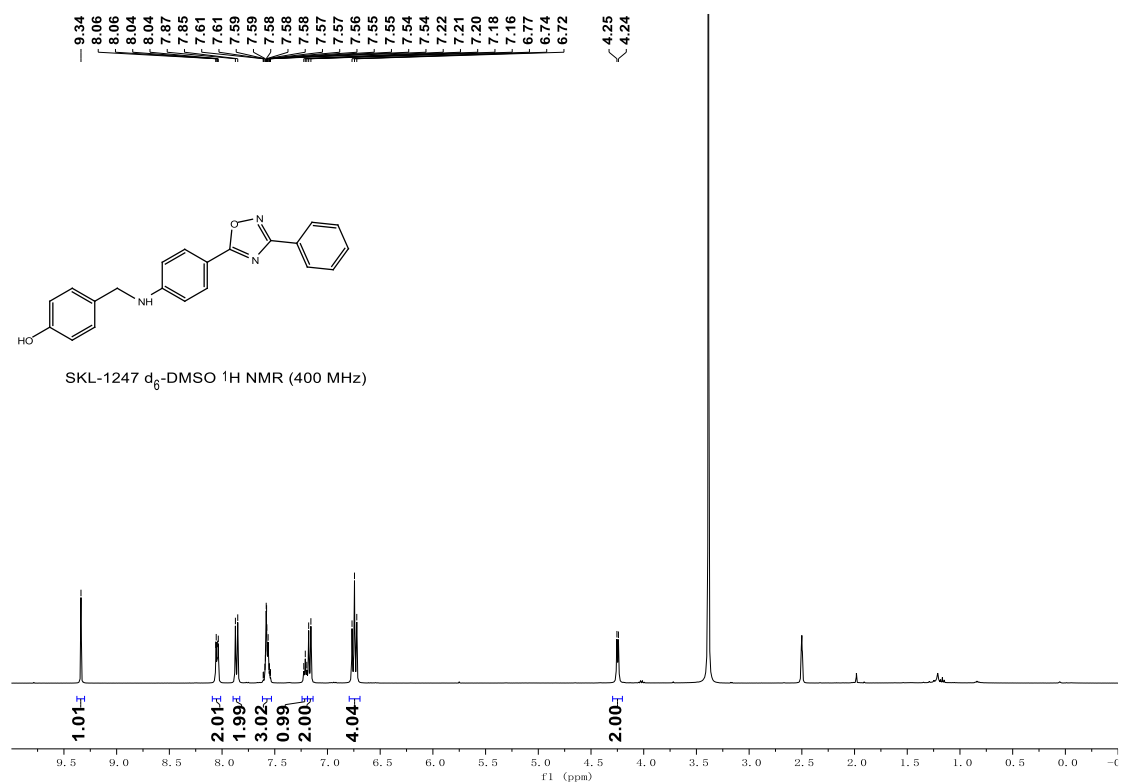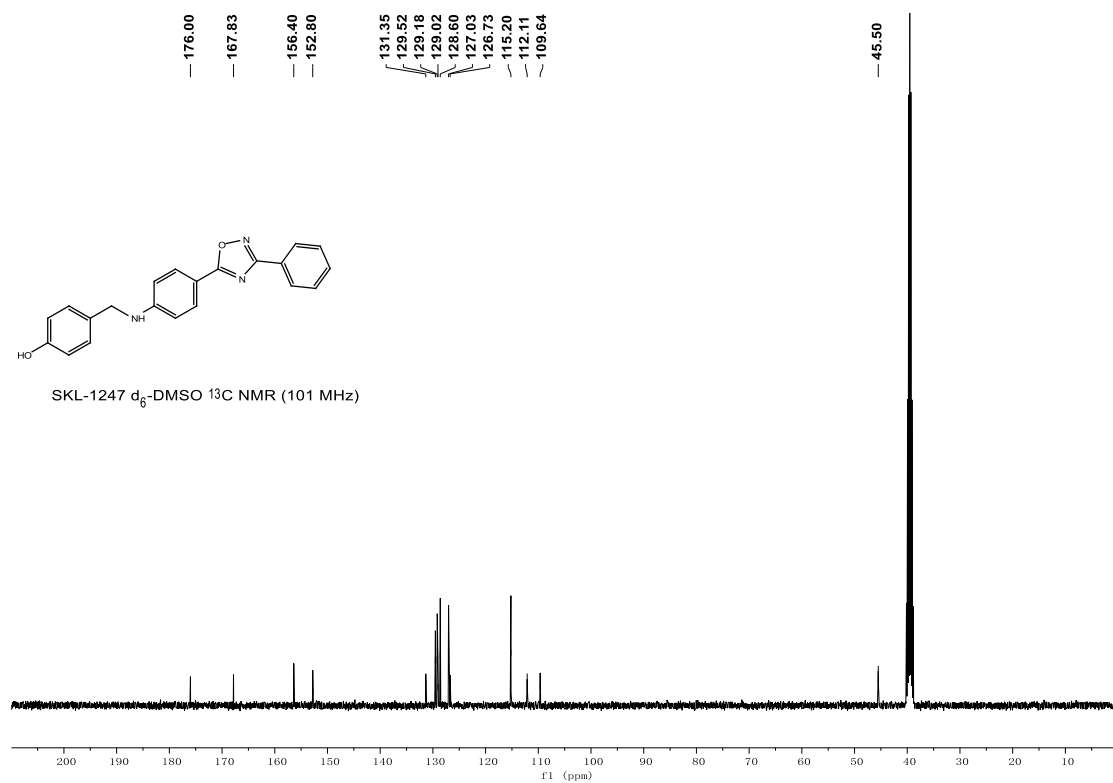

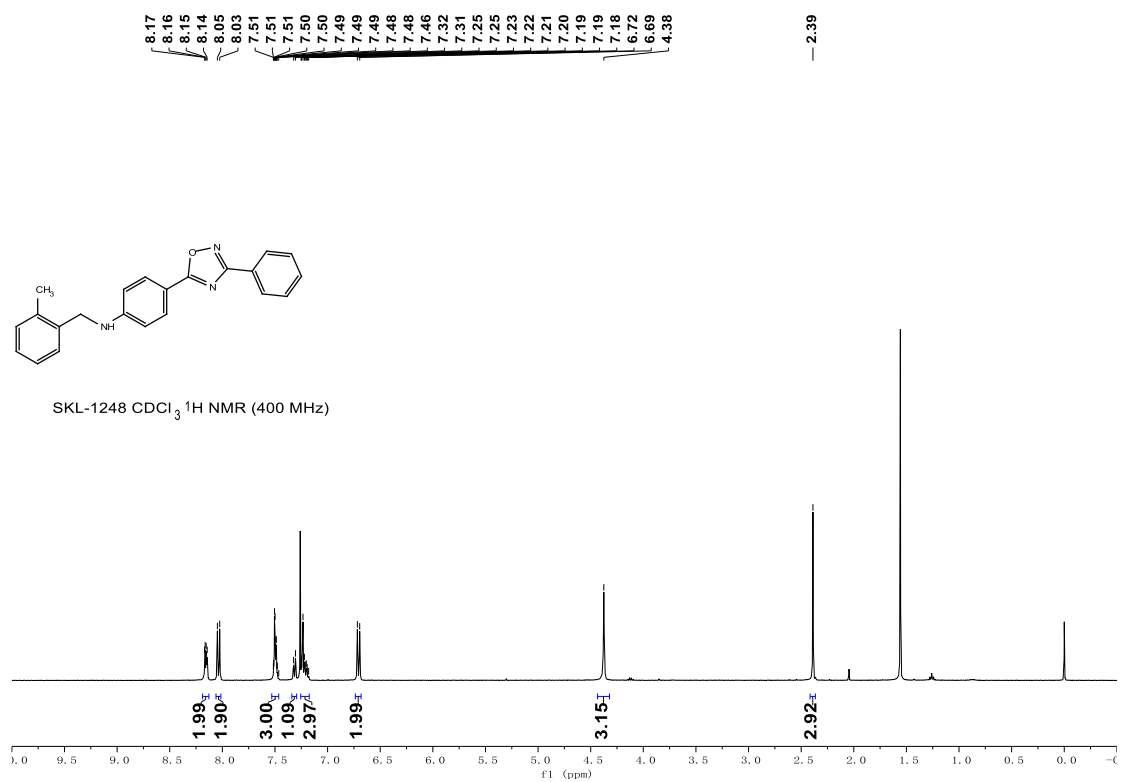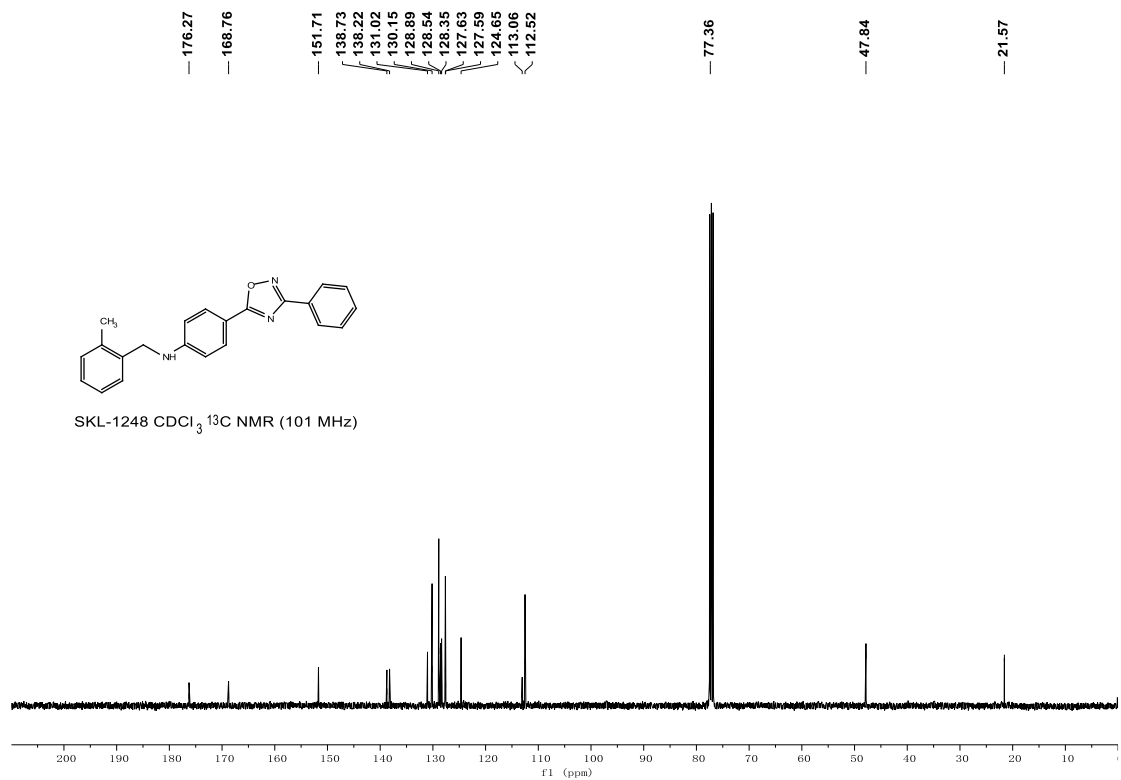

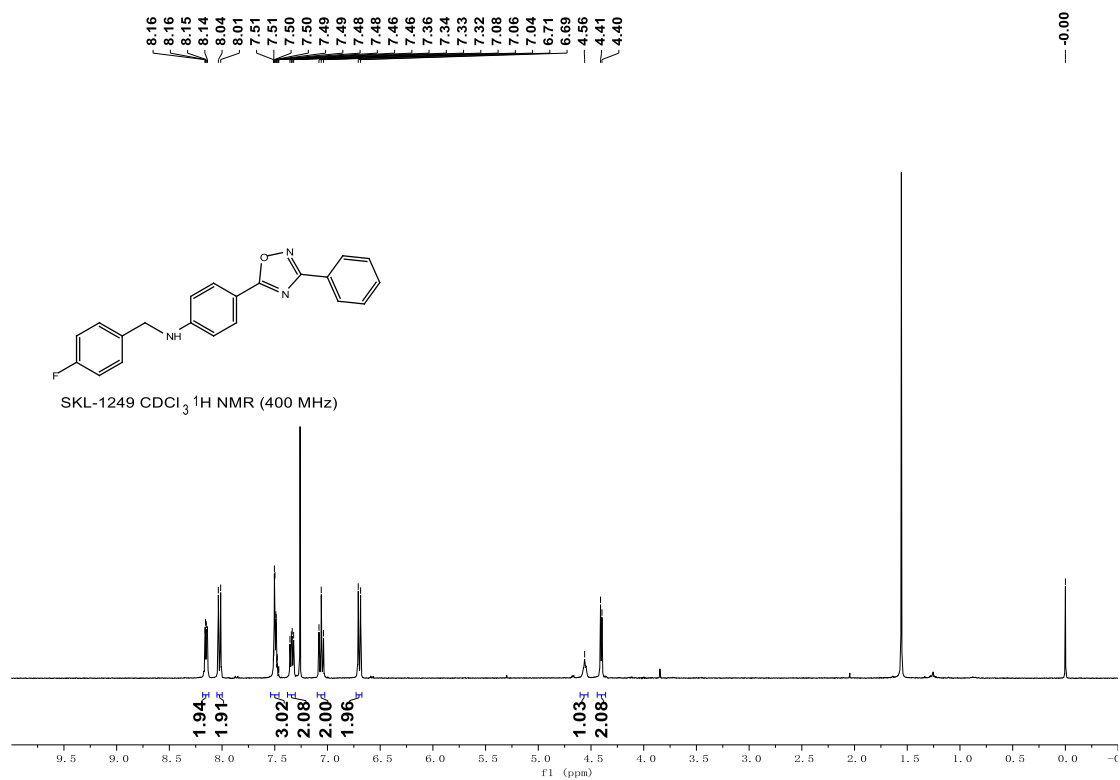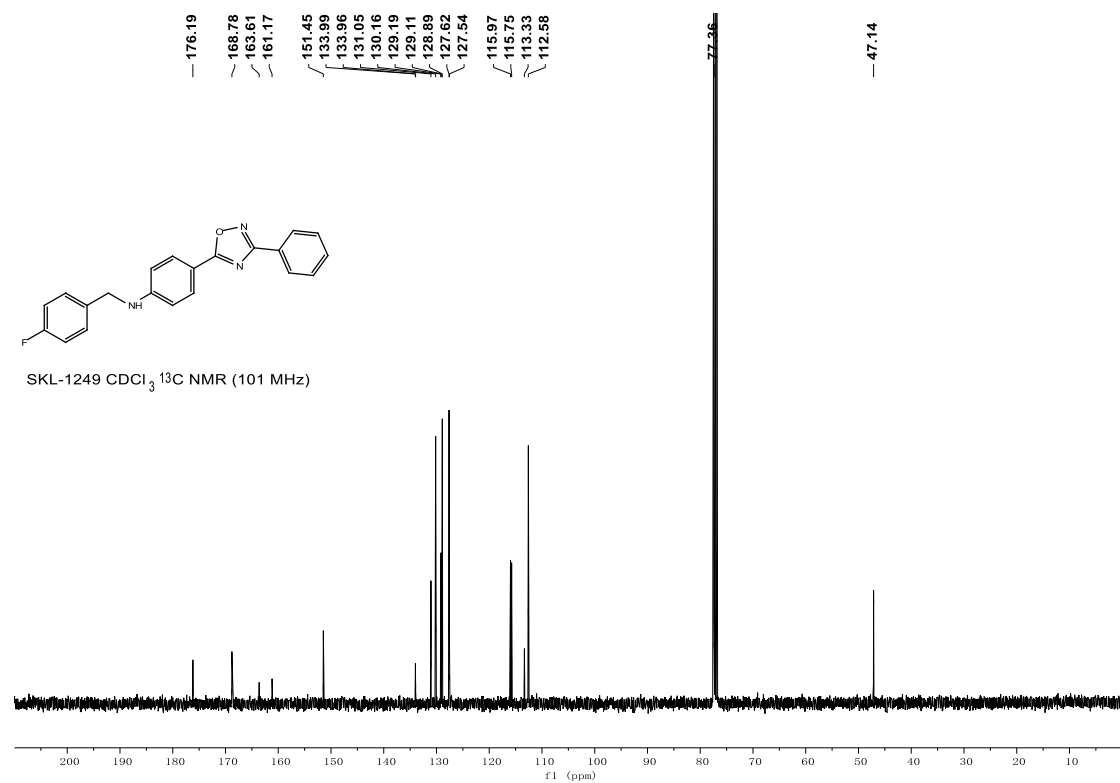

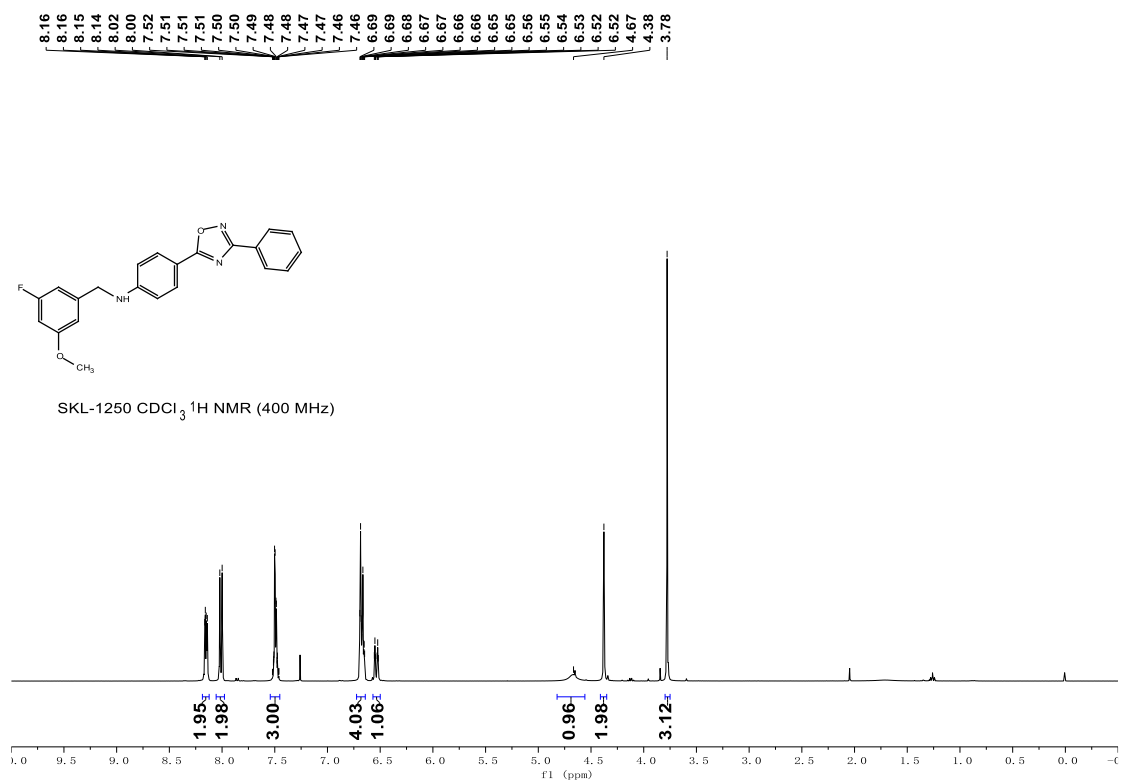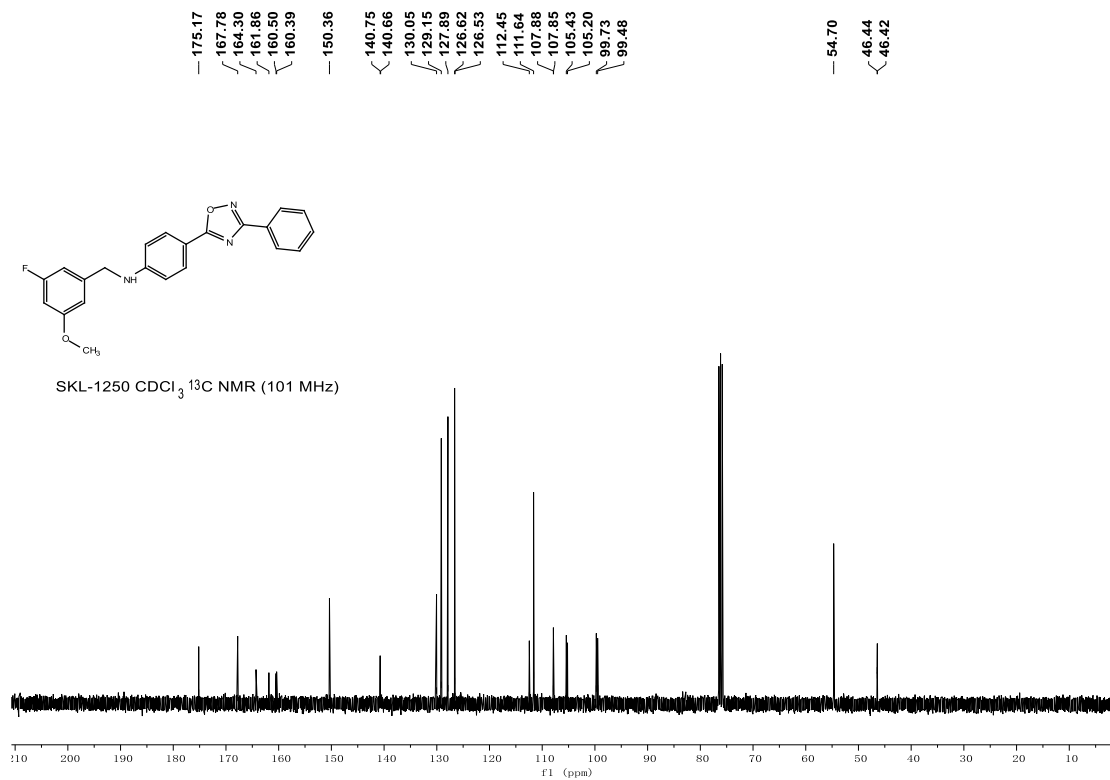

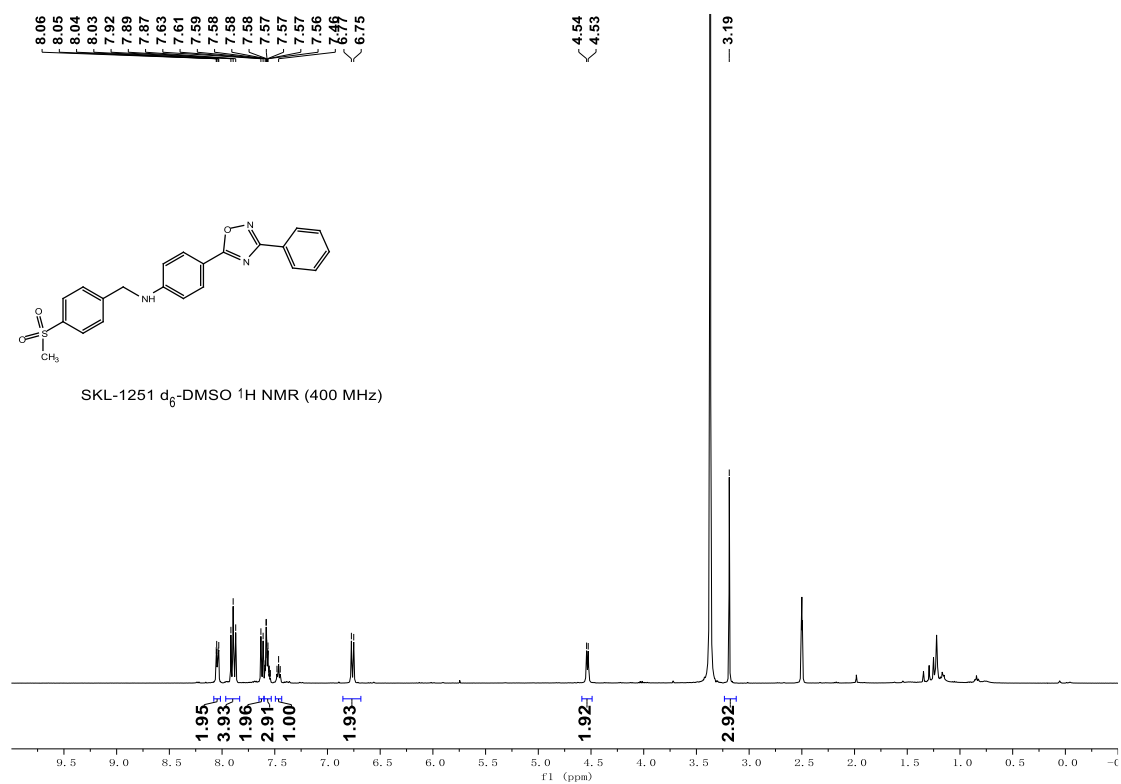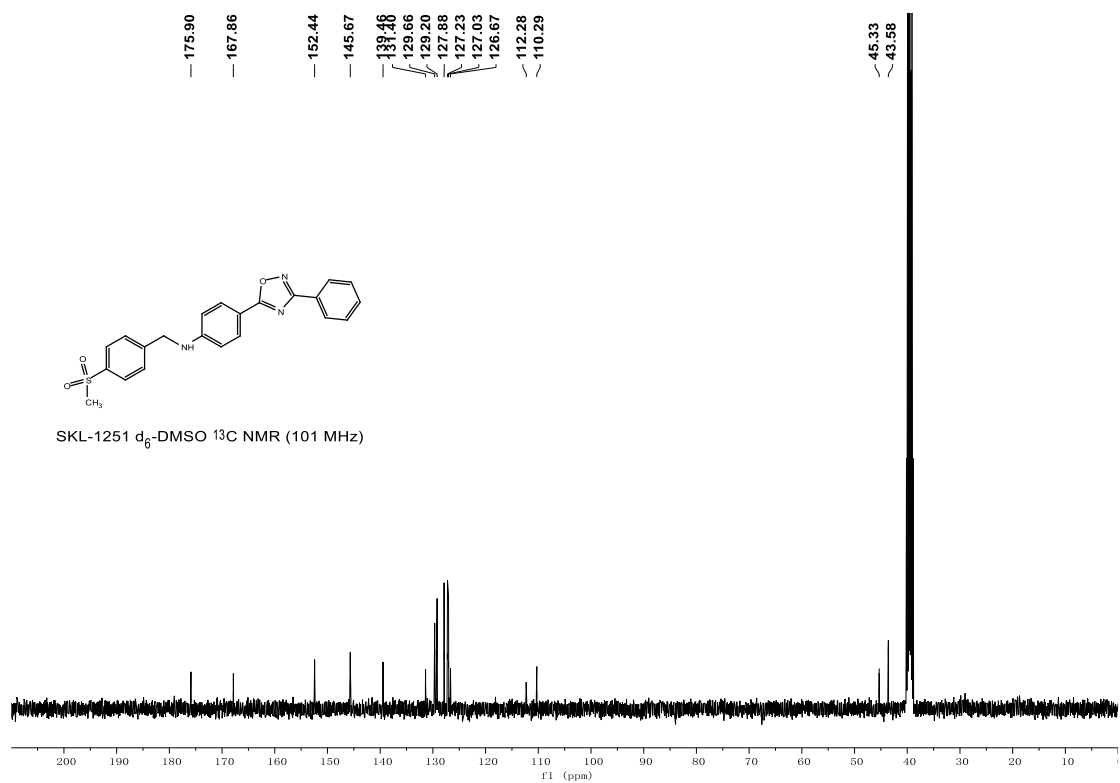



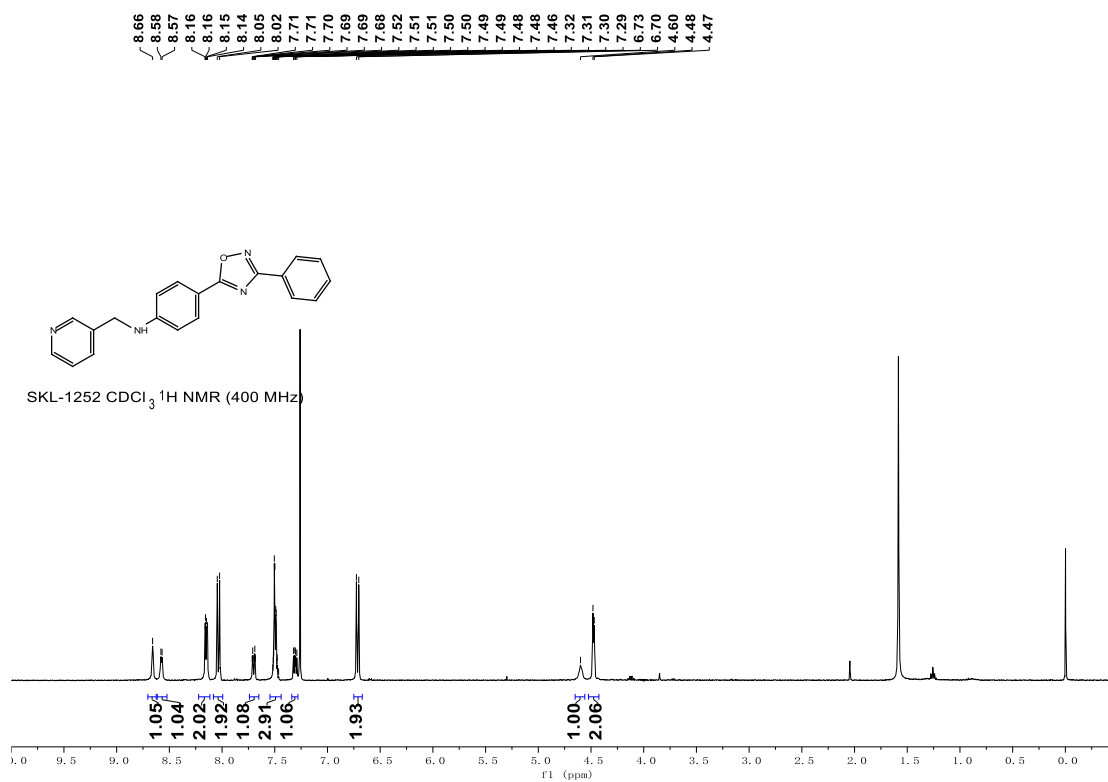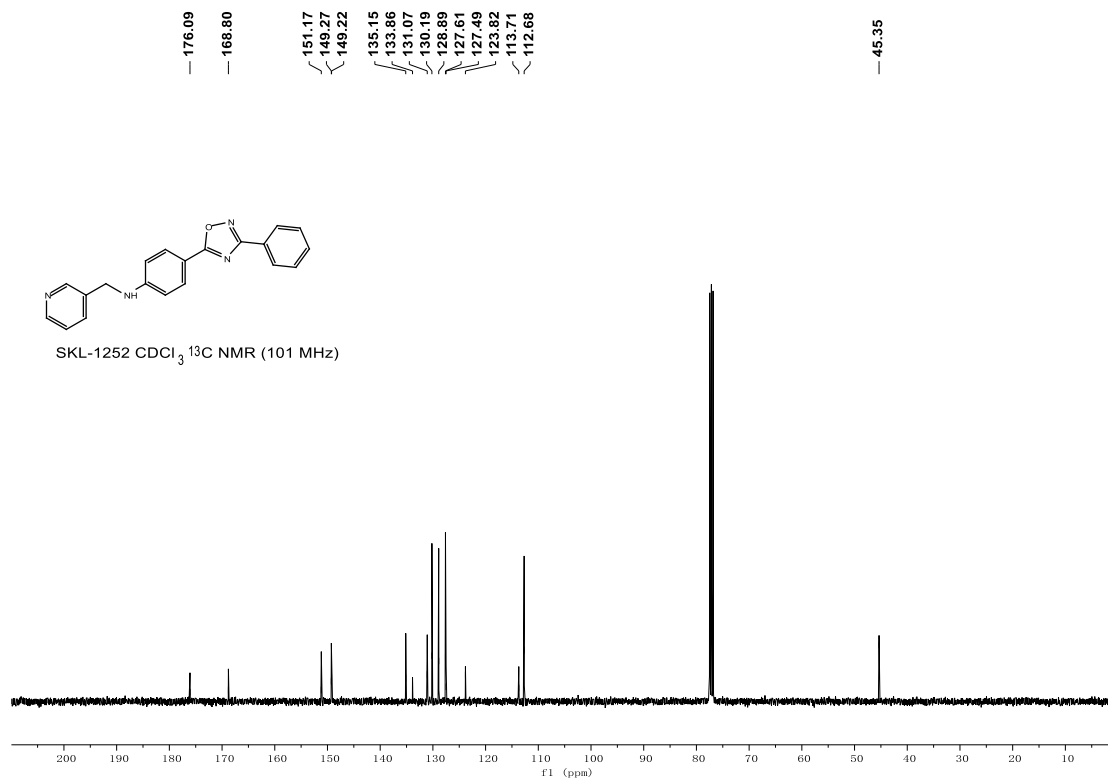

Supplement: Supplementary file 1 [file 3aee28d3777136a6bcbd7b98.pdf]
